# Supplementary material
Source: publisher figshare collection journal article supplement (https://tandf.figshare.com/articles/dataset/_/7777040)
Supplement: Supplementary file 1 [file 1]

Archive with 2 entries (2 files):
- CIF (p-cl-tpp).cif
- checkcif (p-cl-tpp).pdf
