# Supplementary material
Source: publisher figshare collection journal article supplement (https://tandf.figshare.com/articles/dataset/_/7777040)
Supplement: Supplementary file 1 [file 1 › CIF (p-cl-tpp).cif]

data_p_cl_tpp_rt_cu
_audit_creation_date              2018-08-01
_audit_creation_method
;
Olex2 1.2-ac21
(compiled 2015.09.16 svn.r134, GUI svn.r4998)
;
_publ_contact_author_address      ?
_publ_contact_author_email        ?
_publ_contact_author_name         ''
_publ_contact_author_phone        ?
_publ_section_references
;
Dolomanov, O.V., Bourhis, L.J., Gildea, R.J, Howard, J.A.K. & Puschmann, H.
 (2009), J. Appl. Cryst. 42, 339-341.

Sheldrick, G.M. (2008). Acta Cryst. A64, 112-122.

Sheldrick, G.M. (2015). Acta Cryst. A71, 3-8.
;
_chemical_name_common             ?
_chemical_name_systematic
;
 ? 
;
_chemical_formula_moiety          '2(C44 H26 Cl4 N4)'
_chemical_formula_sum             'C88 H52 Cl8 N8'
_chemical_formula_weight          1504.98
_chemical_melting_point           ?
_chemical_oxdiff_formula          'C88 H52 Cl8 N8'
loop_
  _atom_type_symbol
  _atom_type_description
  _atom_type_scat_dispersion_real
  _atom_type_scat_dispersion_imag
  _atom_type_scat_source
 'C' 'C' 0.0181 0.0091 'International Tables Vol C Tables 4.2.6.8 and 6.1.1.4'
 'H' 'H' 0.0000 0.0000 'International Tables Vol C Tables 4.2.6.8 and 6.1.1.4'
 'Cl' 'Cl' 0.3639 0.7018 'International Tables Vol C Tables 4.2.6.8 and 6.1.1.4'
 'N' 'N' 0.0311 0.0180 'International Tables Vol C Tables 4.2.6.8 and 6.1.1.4'

_space_group_crystal_system       'monoclinic'
_space_group_IT_number            14
_space_group_name_H-M_alt         'P 1 21/n 1'
_space_group_name_Hall            '-P 2yn'
loop_
  _space_group_symop_id
  _space_group_symop_operation_xyz
 1 'x, y, z'
 2 '-x+1/2, y+1/2, -z+1/2'
 3 '-x, -y, -z'
 4 'x-1/2, -y-1/2, z-1/2'

_cell_length_a                    10.1574(5)
_cell_length_b                    8.9827(4)
_cell_length_c                    20.9350(8)
_cell_angle_alpha                 90.00
_cell_angle_beta                  102.532(4)
_cell_angle_gamma                 90.00
_cell_volume                      1864.63(14)
_cell_formula_units_Z             1
_cell_measurement_reflns_used     2175
_cell_measurement_temperature     293(2)
_cell_measurement_theta_max       66.7590
_cell_measurement_theta_min       4.5050
_exptl_absorpt_coefficient_mu     3.178
_exptl_absorpt_correction_T_max   1.000
_exptl_absorpt_correction_T_min   0.468
_exptl_absorpt_correction_type    gaussian
_exptl_absorpt_process_details
;
CrysAlisPro 1.171.38.46 (Rigaku Oxford Diffraction, 2015)
Numerical absorption correction based on gaussian integration over
			a multifaceted crystal model
Empirical absorption correction using spherical harmonics,
 implemented in SCALE3 ABSPACK scaling algorithm.
;
_exptl_crystal_colour             ?
_exptl_crystal_density_diffrn     1.340
_exptl_crystal_density_meas       ?
_exptl_crystal_density_method     'not measured'
_exptl_crystal_description        monoclinic
_exptl_crystal_F_000              772
loop_
  _exptl_crystal_face_index_h
  _exptl_crystal_face_index_k
  _exptl_crystal_face_index_l
  _exptl_crystal_face_perp_dist
 1 -4 -10 0.0741
 3 -1 -13 0.0514
 -2 1 -11 0.0502
 -5 0 -7 0.1056
 -2 6 2 0.0433
 -1 1 13 0.0569
 1 4 -10 0.0509
 0 1 -13 0.0535
 2 -4 7 0.0525
 3 3 8 0.0970
 -1 6 -3 0.0476
 5 -4 -1 0.0787
 -2 4 -7 0.0557
 -3 -4 -7 0.0918
 4 -4 -8 0.0610
 -2 -2 -11 0.0689
 0 -5 7 0.0550
 -6 -2 1 0.1541
 6 2 -1 0.1173

_exptl_crystal_size_max           0.28
_exptl_crystal_size_mid           0.133
_exptl_crystal_size_min           0.107
loop_
  _exptl_oxdiff_crystal_face_indexfrac_h
  _exptl_oxdiff_crystal_face_indexfrac_k
  _exptl_oxdiff_crystal_face_indexfrac_l
  _exptl_oxdiff_crystal_face_x
  _exptl_oxdiff_crystal_face_y
  _exptl_oxdiff_crystal_face_z
 1.0000 -4.0002 -10.0022 0.1104 0.5530 0.8338
 2.9999 -0.9996 -13.0026 0.5904 0.6689 0.4625
 -2.0011 0.9997 -11.0006 0.7629 -0.1387 0.5699
 -5.0013 -0.0010 -6.9995 0.4617 -0.5288 0.7533
 -2.0009 6.0002 2.0018 0.5806 -0.6768 -0.6024
 -0.9995 0.9999 13.0020 -0.6157 -0.4106 -0.6334
 0.9992 4.0006 -10.0008 1.0025 0.0396 -0.0732
 -0.0008 1.0001 -13.0014 0.8514 0.1531 0.4921
 2.0012 -4.0000 6.9996 -0.8697 0.3981 -0.0435
 3.0006 3.0009 8.0006 -0.1587 0.0613 -0.9691
 -1.0010 6.0004 -2.9991 0.8525 -0.4641 -0.4550
 5.0012 -3.9995 -1.0022 -0.4524 0.9192 0.0727
 -2.0012 4.0000 -6.9996 0.8697 -0.3981 0.0435
 -3.0005 -4.0010 -7.0007 -0.0097 -0.0138 1.0359
 4.0007 -3.9997 -8.0027 -0.0414 0.9070 0.4842
 -2.0008 -2.0006 -11.0011 0.4283 0.0539 0.9100
 0.0009 -5.0005 7.0000 -0.9559 0.2039 0.2408
 -6.0008 -2.0013 1.0015 -0.2040 -0.6633 0.6929
 6.0008 2.0013 -1.0015 0.2040 0.6633 -0.6929

_exptl_special_details
;
 ? 
;
_diffrn_reflns_av_R_equivalents   0.0182
_diffrn_reflns_av_unetI/netI      0.0235
_diffrn_reflns_limit_h_max        11
_diffrn_reflns_limit_h_min        -12
_diffrn_reflns_limit_k_max        7
_diffrn_reflns_limit_k_min        -10
_diffrn_reflns_limit_l_max        23
_diffrn_reflns_limit_l_min        -24
_diffrn_reflns_number             5828
_diffrn_reflns_theta_full         66.78
_diffrn_reflns_theta_max          66.78
_diffrn_reflns_theta_min          4.51
_diffrn_ambient_temperature       293(2)
_diffrn_detector                  'CCD plate'
_diffrn_detector_area_resol_mean  15.9974
_diffrn_detector_type             Eos
_diffrn_measured_fraction_theta_full 0.989
_diffrn_measured_fraction_theta_max 0.989
_diffrn_measurement_details
;
List of Runs (angles in degrees, time in seconds):

  # Type    Start    End  Width  t~exp~   \w     \q     \k     \f   Frames
--------------------------------------------------------------------------
  1  \w     10.00  91.00   1.00    1.00    --   25.69  57.00  90.00   81
  2  \w     38.00 141.00   1.00    5.00    --   66.85  50.00  30.00  103
  3  \w    114.00 165.00   1.00   25.00    --  108.00  65.00  37.00   51
  4  \w    101.00 132.00   1.00    5.00    --   66.85 111.00 -60.00   31
  5  \w    105.00 149.00   1.00    5.00    --   66.85 111.00-150.00   44
  6  \w     59.00 149.00   1.00    5.00    --   66.85 178.00 -60.00   90
  7  \w     80.00 165.00   1.00   25.00    --  108.00 -11.00   0.00   85
  8  \w     87.00 144.00   1.00   25.00    --  108.00 -65.00 -30.00   57
  9  \w     55.00  80.00   1.00    1.00    --   25.69 -99.00   0.00   25
 10  \w     50.00 134.00   1.00   25.00    --  108.00 -43.00  60.00   84
 11  \w     37.00  73.00   1.00   25.00    --  108.00 -65.00 -30.00   36
 12  \w     39.00 108.00   1.00   25.00    --  108.00-104.00 -90.00   69
 13  \w     36.00 105.00   1.00   25.00    --  108.00 -54.00-120.00   69
 14  \w     28.00 169.00   1.00   25.00    --  108.00 -32.00 -60.00  141
 15  \w      6.00  79.00   1.00    1.00    --   25.69 -99.00-150.00   73
 16  \w     11.00 101.00   1.00    5.00    --   66.85 -50.00-150.00   90
 17  \w      3.00  48.00   1.00    1.00    --   25.69 -99.00   0.00   45
;
_diffrn_measurement_device        'four-circle diffractometer'
_diffrn_measurement_device_type   'SuperNova, Dual, Cu at zero, Eos'
_diffrn_measurement_method        '\w scans'
_diffrn_orient_matrix_type
'CrysAlisPro convention (1999,Acta A55,543-557)'
_diffrn_orient_matrix_UB_11       -0.0126933000
_diffrn_orient_matrix_UB_12       0.1115069000
_diffrn_orient_matrix_UB_13       -0.0569048000
_diffrn_orient_matrix_UB_21       0.1291437000
_diffrn_orient_matrix_UB_22       -0.0641539000
_diffrn_orient_matrix_UB_23       -0.0167157000
_diffrn_orient_matrix_UB_31       -0.0854350000
_diffrn_orient_matrix_UB_32       -0.1133567000
_diffrn_orient_matrix_UB_33       -0.0465634000
_diffrn_radiation_monochromator   mirror
_diffrn_radiation_probe           x-ray
_diffrn_radiation_type            CuK\a
_diffrn_radiation_wavelength      1.54184
_diffrn_source                    'micro-focus sealed X-ray tube'
_diffrn_source_type               'SuperNova (Cu) X-ray Source'
_diffrn_standards_decay_%         ?
_diffrn_standards_interval_count  ?
_diffrn_standards_interval_time   ?
_diffrn_standards_number          ?
_reflns_number_gt                 2648
_reflns_number_total              3271
_reflns_odcompleteness_completeness 98.43
_reflns_odcompleteness_iscentric  1
_reflns_odcompleteness_theta      66.97
_reflns_threshold_expression      >2sigma(I)
_computing_cell_refinement        'CrysAlisPro 1.171.38.46 (Rigaku OD, 2015)'
_computing_data_collection        'CrysAlisPro 1.171.38.46 (Rigaku OD, 2015)'
_computing_data_reduction         'CrysAlisPro 1.171.38.46 (Rigaku OD, 2015)'
_computing_molecular_graphics     'Olex2 (Dolomanov et al., 2009)'
_computing_publication_material   'Olex2 (Dolomanov et al., 2009)'
_computing_structure_refinement   'ShelXL (Sheldrick, 2008)'
_computing_structure_solution     'ShelXT (Sheldrick, 2015)'
_refine_diff_density_max          0.702
_refine_diff_density_min          -0.644
_refine_diff_density_rms          0.051
_refine_ls_extinction_coef        ?
_refine_ls_extinction_method      none
_refine_ls_goodness_of_fit_ref    1.087
_refine_ls_hydrogen_treatment     constr
_refine_ls_matrix_type            full
_refine_ls_number_parameters      235
_refine_ls_number_reflns          3271
_refine_ls_number_restraints      0
_refine_ls_R_factor_all           0.0759
_refine_ls_R_factor_gt            0.0642
_refine_ls_restrained_S_all       1.087
_refine_ls_shift/su_max           0.000
_refine_ls_shift/su_mean          0.000
_refine_ls_structure_factor_coef  Fsqd
_refine_ls_weighting_details
'calc w=1/[\s^2^(Fo^2^)+(0.1160P)^2^+0.7123P] where P=(Fo^2^+2Fc^2^)/3'
_refine_ls_weighting_scheme       calc
_refine_ls_wR_factor_gt           0.1935
_refine_ls_wR_factor_ref          0.2113
_refine_special_details
;
 Refinement of F^2^ against ALL reflections.  The weighted R-factor wR and 
 goodness of fit S are based on F^2^, conventional R-factors R are based 
 on F, with F set to zero for negative F^2^. The threshold expression of 
 F^2^ > 2sigma(F^2^) is used only for calculating R-factors(gt) etc. and is 
 not relevant to the choice of reflections for refinement.  R-factors based 
 on F^2^ are statistically about twice as large as those based on F, and R- 
 factors based on ALL data will be even larger. 
;
_olex2_refinement_description
;
1. Fixed Uiso
 At 1.2 times of:
  All C(H) groups, All N(H) groups
2.a Aromatic/amide H refined with riding coordinates:
 N2(H2), C9(H9), C15(H15), C16(H16), C10(H10), C3(H3), C2(H2A), C18(H18),
 C5(H5), C19(H19), C6(H6), C22(H22), C21(H21)
;
_atom_sites_solution_hydrogens    geom
_atom_sites_solution_primary      direct
_atom_sites_solution_secondary    difmap
loop_
  _atom_site_label
  _atom_site_type_symbol
  _atom_site_fract_x
  _atom_site_fract_y
  _atom_site_fract_z
  _atom_site_U_iso_or_equiv
  _atom_site_adp_type
  _atom_site_occupancy
  _atom_site_calc_flag
  _atom_site_disorder_assembly
  _atom_site_disorder_group
  _atom_site_refinement_flags_posn
 Cl1 Cl 0.31840(14) 0.86846(14) 0.06782(5) 0.1089(5) Uani 1 d . . .
 Cl2 Cl 0.9578(2) -0.31233(17) 0.36140(11) 0.1592(8) Uani 1 d . . .
 N1 N 0.5480(2) 0.4333(3) 0.41459(12) 0.0598(6) Uani 1 d . . .
 N2 N 0.5968(2) 0.3131(3) 0.54633(12) 0.0591(6) Uani 1 d . . .
 H2 H 0.5565 0.3901 0.5268 0.071 Uiso 1 calc . . R
 C14 C 0.6112(3) 0.2824(3) 0.61127(14) 0.0617(7) Uani 1 d . . .
 C13 C 0.6556(3) 0.2037(3) 0.51697(15) 0.0611(7) Uani 1 d . . .
 C7 C 0.4362(3) 0.6333(3) 0.34247(14) 0.0617(7) Uani 1 d . . .
 C11 C 0.6137(3) 0.3057(3) 0.40390(15) 0.0618(7) Uani 1 d . . .
 C8 C 0.5094(3) 0.5008(3) 0.35503(14) 0.0627(7) Uani 1 d . . .
 C12 C 0.6658(3) 0.1992(3) 0.45139(15) 0.0606(7) Uani 1 d . . .
 C17 C 0.7390(3) 0.0694(3) 0.43099(14) 0.0614(7) Uani 1 d . . .
 C4 C 0.4067(3) 0.6931(3) 0.27414(14) 0.0633(7) Uani 1 d . . .
 C9 C 0.5541(4) 0.4141(4) 0.30535(16) 0.0728(8) Uani 1 d . . .
 H9 H 0.5414 0.4372 0.2611 0.087 Uiso 1 calc . . R
 C15 C 0.6814(4) 0.1443(4) 0.62348(16) 0.0722(8) Uani 1 d . . .
 H15 H 0.7047 0.0959 0.6636 0.087 Uiso 1 calc . . R
 C16 C 0.7081(3) 0.0962(4) 0.56643(16) 0.0713(8) Uani 1 d . . .
 H16 H 0.7527 0.0087 0.5604 0.086 Uiso 1 calc . . R
 C10 C 0.6176(4) 0.2936(4) 0.33554(16) 0.0732(8) Uani 1 d . . .
 H10 H 0.6567 0.2171 0.3161 0.088 Uiso 1 calc . . R
 C3 C 0.2794(4) 0.6809(4) 0.23428(17) 0.0749(8) Uani 1 d . . .
 H3 H 0.2112 0.6349 0.2504 0.090 Uiso 1 calc . . R
 C2 C 0.2514(4) 0.7352(4) 0.17136(17) 0.0798(9) Uani 1 d . . .
 H2A H 0.1655 0.7253 0.1450 0.096 Uiso 1 calc . . R
 C1 C 0.3516(4) 0.8039(4) 0.14811(16) 0.0756(9) Uani 1 d . . .
 C18 C 0.6885(3) -0.0748(4) 0.43046(17) 0.0734(8) Uani 1 d . . .
 H18 H 0.6081 -0.0920 0.4436 0.088 Uiso 1 calc . . R
 C5 C 0.5063(4) 0.7635(4) 0.24937(16) 0.0788(9) Uani 1 d . . .
 H5 H 0.5925 0.7725 0.2755 0.095 Uiso 1 calc . . R
 C19 C 0.7578(4) -0.1930(4) 0.41038(19) 0.0830(10) Uani 1 d . . .
 H19 H 0.7252 -0.2897 0.4107 0.100 Uiso 1 calc . . R
 C6 C 0.4799(4) 0.8205(4) 0.18652(18) 0.0828(10) Uani 1 d . . .
 H6 H 0.5469 0.8689 0.1705 0.099 Uiso 1 calc . . R
 C22 C 0.8588(4) 0.0901(4) 0.4119(2) 0.0871(11) Uani 1 d . . .
 H22 H 0.8953 0.1853 0.4131 0.105 Uiso 1 calc . . R
 C20 C 0.8748(4) -0.1652(5) 0.3900(2) 0.0876(11) Uani 1 d . . .
 C21 C 0.9258(4) -0.0271(5) 0.3910(3) 0.1009(13) Uani 1 d . . .
 H21 H 1.0061 -0.0108 0.3775 0.121 Uiso 1 calc . . R

loop_
  _atom_site_aniso_label
  _atom_site_aniso_U_11
  _atom_site_aniso_U_22
  _atom_site_aniso_U_33
  _atom_site_aniso_U_23
  _atom_site_aniso_U_13
  _atom_site_aniso_U_12
 Cl1 0.1513(10) 0.1061(8) 0.0634(5) 0.0178(5) 0.0102(5) 0.0224(7)
 Cl2 0.1598(14) 0.0967(9) 0.235(2) -0.0374(11) 0.0731(13) 0.0410(9)
 N1 0.0653(13) 0.0510(12) 0.0628(13) 0.0023(10) 0.0130(10) 0.0035(10)
 N2 0.0666(13) 0.0480(12) 0.0622(13) 0.0048(10) 0.0125(10) 0.0060(10)
 C14 0.0697(16) 0.0506(14) 0.0622(16) 0.0023(12) 0.0089(12) 0.0032(12)
 C13 0.0626(15) 0.0523(15) 0.0672(16) 0.0024(12) 0.0111(12) 0.0051(12)
 C7 0.0705(16) 0.0541(15) 0.0586(15) 0.0034(12) 0.0095(12) 0.0002(13)
 C11 0.0641(15) 0.0551(15) 0.0665(16) 0.0018(12) 0.0149(12) 0.0057(12)
 C8 0.0711(16) 0.0547(15) 0.0619(16) 0.0015(12) 0.0136(13) 0.0024(13)
 C12 0.0588(14) 0.0558(15) 0.0669(16) 0.0008(12) 0.0130(12) 0.0033(12)
 C17 0.0632(15) 0.0553(15) 0.0631(15) 0.0009(12) 0.0081(12) 0.0071(12)
 C4 0.0768(18) 0.0507(14) 0.0596(15) 0.0014(12) 0.0085(13) 0.0045(13)
 C9 0.089(2) 0.0692(19) 0.0618(17) 0.0049(14) 0.0205(15) 0.0130(16)
 C15 0.091(2) 0.0585(17) 0.0629(17) 0.0072(13) 0.0086(15) 0.0162(15)
 C16 0.0821(19) 0.0579(17) 0.0716(19) 0.0040(13) 0.0115(15) 0.0170(15)
 C10 0.087(2) 0.0674(19) 0.0681(18) -0.0008(14) 0.0236(15) 0.0169(16)
 C3 0.079(2) 0.076(2) 0.0679(18) -0.0025(15) 0.0105(15) 0.0015(16)
 C2 0.083(2) 0.079(2) 0.0696(19) -0.0044(16) -0.0011(16) 0.0110(18)
 C1 0.105(2) 0.0564(17) 0.0612(17) -0.0003(13) 0.0086(16) 0.0167(17)
 C18 0.0730(18) 0.0632(18) 0.082(2) -0.0069(15) 0.0131(15) -0.0030(14)
 C5 0.085(2) 0.078(2) 0.0675(19) 0.0114(16) 0.0050(16) -0.0059(17)
 C19 0.096(2) 0.0562(18) 0.088(2) -0.0114(16) 0.0008(19) 0.0018(17)
 C6 0.098(2) 0.075(2) 0.073(2) 0.0146(17) 0.0151(18) -0.0053(19)
 C22 0.075(2) 0.066(2) 0.126(3) -0.003(2) 0.033(2) 0.0047(16)
 C20 0.087(2) 0.073(2) 0.101(3) -0.0108(19) 0.017(2) 0.0196(19)
 C21 0.080(2) 0.086(3) 0.145(4) -0.009(3) 0.042(2) 0.015(2)

_geom_special_details
;
 All esds (except the esd in the dihedral angle between two l.s. planes) 
 are estimated using the full covariance matrix.  The cell esds are taken 
 into account individually in the estimation of esds in distances, angles 
 and torsion angles; correlations between esds in cell parameters are only 
 used when they are defined by crystal symmetry.  An approximate (isotropic) 
 treatment of cell esds is used for estimating esds involving l.s. planes. 
;
loop_
  _geom_bond_atom_site_label_1
  _geom_bond_atom_site_label_2
  _geom_bond_distance
  _geom_bond_site_symmetry_2
  _geom_bond_publ_flag
 Cl1 C1 1.740(3) . ?
 Cl2 C20 1.743(4) . ?
 N1 C11 1.369(4) . ?
 N1 C8 1.365(4) . ?
 N2 H2 0.8600 . ?
 N2 C14 1.364(4) . ?
 N2 C13 1.364(4) . ?
 C14 C7 1.395(4) 3_666 ?
 C14 C15 1.426(4) . ?
 C13 C12 1.400(4) . ?
 C13 C16 1.431(4) . ?
 C7 C14 1.395(4) 3_666 ?
 C7 C8 1.398(4) . ?
 C7 C4 1.496(4) . ?
 C11 C12 1.398(4) . ?
 C11 C10 1.444(4) . ?
 C8 C9 1.449(4) . ?
 C12 C17 1.494(4) . ?
 C17 C18 1.391(5) . ?
 C17 C22 1.374(5) . ?
 C4 C3 1.383(5) . ?
 C4 C5 1.385(5) . ?
 C9 H9 0.9300 . ?
 C9 C10 1.345(5) . ?
 C15 H15 0.9300 . ?
 C15 C16 1.352(5) . ?
 C16 H16 0.9300 . ?
 C10 H10 0.9300 . ?
 C3 H3 0.9300 . ?
 C3 C2 1.375(5) . ?
 C2 H2A 0.9300 . ?
 C2 C1 1.367(6) . ?
 C1 C6 1.383(6) . ?
 C18 H18 0.9300 . ?
 C18 C19 1.389(5) . ?
 C5 H5 0.9300 . ?
 C5 C6 1.383(5) . ?
 C19 H19 0.9300 . ?
 C19 C20 1.369(6) . ?
 C6 H6 0.9300 . ?
 C22 H22 0.9300 . ?
 C22 C21 1.376(5) . ?
 C20 C21 1.343(6) . ?
 C21 H21 0.9300 . ?

loop_
  _geom_angle_atom_site_label_1
  _geom_angle_atom_site_label_2
  _geom_angle_atom_site_label_3
  _geom_angle
  _geom_angle_site_symmetry_1
  _geom_angle_site_symmetry_3
  _geom_angle_publ_flag
 C8 N1 C11 106.0(2) . . ?
 C14 N2 H2 125.1 . . ?
 C14 N2 C13 109.9(2) . . ?
 C13 N2 H2 125.1 . . ?
 N2 C14 C7 127.1(3) . 3_666 ?
 N2 C14 C15 107.2(3) . . ?
 C7 C14 C15 125.6(3) 3_666 . ?
 N2 C13 C12 126.5(3) . . ?
 N2 C13 C16 106.9(3) . . ?
 C12 C13 C16 126.5(3) . . ?
 C14 C7 C8 125.6(3) 3_666 . ?
 C14 C7 C4 116.2(3) 3_666 . ?
 C8 C7 C4 118.3(3) . . ?
 N1 C11 C12 125.4(3) . . ?
 N1 C11 C10 110.1(3) . . ?
 C12 C11 C10 124.5(3) . . ?
 N1 C8 C7 125.8(3) . . ?
 N1 C8 C9 110.1(3) . . ?
 C7 C8 C9 124.0(3) . . ?
 C13 C12 C17 116.7(3) . . ?
 C11 C12 C13 125.5(3) . . ?
 C11 C12 C17 117.8(3) . . ?
 C18 C17 C12 121.6(3) . . ?
 C22 C17 C12 120.3(3) . . ?
 C22 C17 C18 118.2(3) . . ?
 C3 C4 C7 121.0(3) . . ?
 C3 C4 C5 118.3(3) . . ?
 C5 C4 C7 120.7(3) . . ?
 C8 C9 H9 126.6 . . ?
 C10 C9 C8 106.8(3) . . ?
 C10 C9 H9 126.6 . . ?
 C14 C15 H15 126.0 . . ?
 C16 C15 C14 107.9(3) . . ?
 C16 C15 H15 126.0 . . ?
 C13 C16 H16 126.0 . . ?
 C15 C16 C13 108.0(3) . . ?
 C15 C16 H16 126.0 . . ?
 C11 C10 H10 126.5 . . ?
 C9 C10 C11 107.0(3) . . ?
 C9 C10 H10 126.5 . . ?
 C4 C3 H3 119.3 . . ?
 C2 C3 C4 121.5(4) . . ?
 C2 C3 H3 119.3 . . ?
 C3 C2 H2A 120.5 . . ?
 C1 C2 C3 119.0(3) . . ?
 C1 C2 H2A 120.5 . . ?
 C2 C1 Cl1 119.4(3) . . ?
 C2 C1 C6 121.5(3) . . ?
 C6 C1 Cl1 119.1(3) . . ?
 C17 C18 H18 119.9 . . ?
 C19 C18 C17 120.3(3) . . ?
 C19 C18 H18 119.9 . . ?
 C4 C5 H5 119.4 . . ?
 C6 C5 C4 121.3(3) . . ?
 C6 C5 H5 119.4 . . ?
 C18 C19 H19 120.5 . . ?
 C20 C19 C18 119.0(3) . . ?
 C20 C19 H19 120.5 . . ?
 C1 C6 H6 120.8 . . ?
 C5 C6 C1 118.5(4) . . ?
 C5 C6 H6 120.8 . . ?
 C17 C22 H22 119.3 . . ?
 C17 C22 C21 121.3(4) . . ?
 C21 C22 H22 119.3 . . ?
 C19 C20 Cl2 119.1(3) . . ?
 C21 C20 Cl2 119.4(3) . . ?
 C21 C20 C19 121.5(3) . . ?
 C22 C21 H21 120.2 . . ?
 C20 C21 C22 119.7(4) . . ?
 C20 C21 H21 120.2 . . ?

_iucr_refine_instructions_details
;
TITL p_cl_tpp_rt_cu_a.res in P2(1)/n
REM Old TITL P_CL_TPP_RT_CU in P21/n #14
REM SHELXT solution in P2(1)/n
REM R1 0.231, Rweak 0.136, Alpha 0.029, Orientation as input
REM Formula found by SHELXT: C22 N2 Cl2
CELL 1.54184 10.1574 8.982729 20.935015 90 102.5315 90
ZERR 1 0.000478 0.000361 0.000848 0 0.0044 0
LATT 1
SYMM 0.5-X,0.5+Y,0.5-Z
SFAC C H Cl N
UNIT 88 52 8 8
 
L.S. 10
PLAN  20
BOND $H
LIST 6
fmap 2
ACTA
REM <olex2.extras>
REM <HklSrc "%.\\P_CL_TPP_RT_CU.hkl">
REM </olex2.extras>
 
WGHT    0.116000    0.712300
FVAR       4.43560
CL1   3    0.318397    0.868461    0.067824    11.00000    0.15133    0.10613 =
         0.06342    0.01780    0.01018    0.02239
CL2   3    0.957837   -0.312330    0.361400    11.00000    0.15983    0.09670 =
         0.23492   -0.03743    0.07312    0.04101
N1    4    0.547996    0.433312    0.414588    11.00000    0.06528    0.05097 =
         0.06282    0.00228    0.01301    0.00346
N2    4    0.596760    0.313144    0.546326    11.00000    0.06656    0.04798 =
         0.06217    0.00484    0.01245    0.00602
AFIX  43
H2    2    0.556517    0.390085    0.526781    11.00000   -1.20000
AFIX   0
C14   1    0.611233    0.282402    0.611265    11.00000    0.06973    0.05061 =
         0.06217    0.00231    0.00888    0.00325
C13   1    0.655625    0.203676    0.516970    11.00000    0.06263    0.05229 =
         0.06717    0.00242    0.01113    0.00506
C7    1    0.436155    0.633285    0.342475    11.00000    0.07046    0.05415 =
         0.05859    0.00336    0.00953    0.00020
C11   1    0.613741    0.305681    0.403905    11.00000    0.06408    0.05515 =
         0.06650    0.00176    0.01489    0.00565
C8    1    0.509416    0.500818    0.355026    11.00000    0.07110    0.05468 =
         0.06192    0.00153    0.01357    0.00242
C12   1    0.665811    0.199202    0.451386    11.00000    0.05880    0.05582 =
         0.06689    0.00077    0.01303    0.00329
C17   1    0.738954    0.069353    0.430986    11.00000    0.06320    0.05527 =
         0.06314    0.00088    0.00806    0.00709
C4    1    0.406710    0.693128    0.274142    11.00000    0.07677    0.05071 =
         0.05957    0.00139    0.00849    0.00450
C9    1    0.554128    0.414065    0.305350    11.00000    0.08930    0.06922 =
         0.06182    0.00490    0.02049    0.01301
AFIX  43
H9    2    0.541369    0.437203    0.261131    11.00000   -1.20000
AFIX   0
C15   1    0.681414    0.144328    0.623479    11.00000    0.09142    0.05853 =
         0.06294    0.00716    0.00862    0.01623
AFIX  43
H15   2    0.704716    0.095911    0.663616    11.00000   -1.20000
AFIX   0
C16   1    0.708110    0.096204    0.566431    11.00000    0.08214    0.05790 =
         0.07161    0.00399    0.01153    0.01698
AFIX  43
H16   2    0.752736    0.008654    0.560382    11.00000   -1.20000
AFIX   0
C10   1    0.617647    0.293617    0.335538    11.00000    0.08720    0.06745 =
         0.06813   -0.00075    0.02364    0.01688
AFIX  43
H10   2    0.656658    0.217123    0.316091    11.00000   -1.20000
AFIX   0
C3    1    0.279410    0.680904    0.234280    11.00000    0.07859    0.07584 =
         0.06788   -0.00252    0.01048    0.00148
AFIX  43
H3    2    0.211234    0.634945    0.250381    11.00000   -1.20000
AFIX   0
C2    1    0.251369    0.735194    0.171357    11.00000    0.08260    0.07917 =
         0.06955   -0.00436   -0.00111    0.01101
AFIX  43
H2A   2    0.165460    0.725314    0.144996    11.00000   -1.20000
AFIX   0
C1    1    0.351606    0.803900    0.148112    11.00000    0.10482    0.05638 =
         0.06116   -0.00033    0.00856    0.01666
C18   1    0.688504   -0.074763    0.430461    11.00000    0.07301    0.06322 =
         0.08235   -0.00689    0.01314   -0.00296
AFIX  43
H18   2    0.608065   -0.091976    0.443611    11.00000   -1.20000
AFIX   0
C5    1    0.506258    0.763458    0.249369    11.00000    0.08537    0.07830 =
         0.06754    0.01143    0.00500   -0.00586
AFIX  43
H5    2    0.592479    0.772490    0.275498    11.00000   -1.20000
AFIX   0
C19   1    0.757793   -0.192981    0.410377    11.00000    0.09578    0.05619 =
         0.08823   -0.01139    0.00082    0.00185
AFIX  43
H19   2    0.725213   -0.289666    0.410729    11.00000   -1.20000
AFIX   0
C6    1    0.479909    0.820510    0.186525    11.00000    0.09840    0.07504 =
         0.07336    0.01460    0.01511   -0.00531
AFIX  43
H6    2    0.546923    0.868931    0.170464    11.00000   -1.20000
AFIX   0
C22   1    0.858779    0.090093    0.411869    11.00000    0.07456    0.06611 =
         0.12588   -0.00279    0.03325    0.00468
AFIX  43
H22   2    0.895296    0.185260    0.413087    11.00000   -1.20000
AFIX   0
C20   1    0.874774   -0.165160    0.390047    11.00000    0.08675    0.07303 =
         0.10133   -0.01084    0.01692    0.01958
C21   1    0.925843   -0.027094    0.390959    11.00000    0.08002    0.08637 =
         0.14456   -0.00866    0.04226    0.01502
AFIX  43
H21   2    1.006117   -0.010770    0.377528    11.00000   -1.20000
HKLF 4
 
REM  p_cl_tpp_rt_cu_a.res in P2(1)/n
REM R1 =  0.0642 for   2648 Fo > 4sig(Fo)  and  0.0759 for all   3271 data
REM    235 parameters refined using      0 restraints
 
END  
     
WGHT      0.1161      0.7113 
REM Highest difference peak  0.702,  deepest hole -0.644,  1-sigma level  0.051
Q1    1   0.9592 -0.3512  0.4129  11.00000  0.05    0.70
Q2    1   0.9600 -0.0394  0.4390  11.00000  0.05    0.23
Q3    1   0.6821  0.2071  0.4869  11.00000  0.05    0.20
Q4    1   0.5426  0.4745  0.4471  11.00000  0.05    0.20
Q5    1   0.4204  0.6500  0.3089  11.00000  0.05    0.18
Q6    1   0.2205  0.7898  0.0581  11.00000  0.05    0.17
Q7    1   0.6801  0.1697  0.5250  11.00000  0.05    0.17
Q8    1   0.8640  0.0826  0.4528  11.00000  0.05    0.15
Q9    1   0.4815  0.4197  0.2654  11.00000  0.05    0.15
Q10   1   0.8681 -0.1970  0.4237  11.00000  0.05    0.15
Q11   1   0.4067  0.9333  0.0572  11.00000  0.05    0.14
Q12   1   0.4390  0.8031  0.2647  11.00000  0.05    0.14
Q13   1   0.3794  0.8171  0.1564  11.00000  0.05    0.14
Q14   1   0.6630  0.2744  0.4307  11.00000  0.05    0.14
Q15   1   0.3438  0.6352  0.2419  11.00000  0.05    0.13
Q16   1   0.5242  0.4773  0.3305  11.00000  0.05    0.13
Q17   1   0.5029  0.7593  0.2231  11.00000  0.05    0.13
Q18   1   0.6783  0.0173  0.3546  11.00000  0.05    0.11
Q19   1   0.5211  0.5437  0.3540  11.00000  0.05    0.11
Q20   1   0.5025  0.5725  0.3534  11.00000  0.05    0.11

REM The information below was added by Olex2.
REM
REM R1 = 0.0642 for 2648 Fo > 4sig(Fo) and 0.0759 for all 6127 data
REM n/a parameters refined using n/a restraints
REM Highest difference peak 0.70, deepest hole -0.64
REM Mean Shift 0, Max Shift 0.000.

REM +++ Tabular Listing of Refinement Information +++
REM R1_all = 0.0759
REM R1_gt = 0.0642
REM wR_ref = 0.2113
REM GOOF = 1.087
REM Shift_max = 0.000
REM Shift_mean = 0
REM Reflections_all = 6127
REM Reflections_gt = 2648
REM Parameters = n/a
REM Hole = -0.64
REM Peak = 0.70
REM Flack = n/a

;
_olex2_date_sample_data_collection 2018-01-01
_olex2_submission_special_instructions 'No special instructions were received'
_oxdiff_exptl_absorpt_empirical_details
;
Empirical correction (ABSPACK) includes:
- Absorption correction using spherical harmonics
- Frame scaling
;
_oxdiff_exptl_absorpt_empirical_full_max 1.263
_oxdiff_exptl_absorpt_empirical_full_min 0.826
loop_
  _refln_index_h
  _refln_index_k
  _refln_index_l
  _refln_F_squared_meas
  _refln_F_squared_sigma
  _refln_scale_group_code
 0 0 -3 32.615 42.7251 17
 0 0 -4 494733 2566.58 17
 0 0 -5 26.2399 57.9821 17
 0 0 -6 200078 2035.6 17
 0 0 -7 9.42422 77.4325 17
 0 0 -8 38431 1056.03 17
 0 0 -9 -11.0459 97.0765 17
 0 0 10 43570.1 529.125 2
 0 0 -10 44554.8 1307.31 17
 0 0 11 9.04027 27.0303 2
 0 0 -11 -70.2811 96.9091 17
 0 0 -12 27100.1 1163.11 17
 0 0 12 27021.6 472.229 2
 0 0 13 -0.196 29.9393 2
 0 0 14 6337.69 255.8 2
 0 0 15 8.85931 37.7447 2
 0 0 16 2401.97 174.586 2
 0 0 17 101.305 51.6196 2
 0 0 -18 259.848 33.52 14
 0 0 -18 268.886 34.0154 11
 0 0 -19 -20.5104 22.1151 11
 0 0 -19 -22.3903 23.8233 14
 0 0 19 33.7957 55.9155 2
 0 0 -20 23.2094 22.6418 11
 0 0 -20 0.60075 19.1157 14
 0 0 -21 -9.02858 19.2153 14
 0 0 -21 -54.9061 26.8098 11
 0 0 -22 1604.78 65.8751 11
 0 0 -22 1367.08 57.9256 14
 0 0 -23 -1.23937 17.1539 11
 0 0 -23 12.1452 15.2093 14
 0 0 -24 889.866 40.4657 11
 0 1 0 -0.04147 14.8991 1
 0 1 1 1075.92 74.2083 1
 0 -1 -1 1039.23 86.5077 15
 0 1 2 2821.82 143.584 1
 0 -1 -2 2876.56 146.27 15
 0 -1 -3 89701.8 878.574 15
 0 -1 -4 15226.7 404.7 15
 0 -1 -5 27555.1 722.737 17
 0 -1 -6 96186.9 1465.88 17
 0 -1 -7 6765.6 426.15 17
 0 1 -7 5957.8 402.997 17
 0 -1 -8 336.179 122.785 17
 0 1 -8 218.309 120.861 17
 0 -1 9 13691.2 287.096 2
 0 1 -9 12104.6 659.616 17
 0 -1 -9 12873.4 673.887 17
 0 -1 -10 116577 2153.95 17
 0 -1 10 116565 892.737 2
 0 1 10 112261 824.333 2
 0 1 -10 113238 2131.13 17
 0 1 11 15.1775 25.8278 2
 0 -1 11 5.70548 29.5706 2
 0 -1 -11 -2.41795 116.801 17
 0 1 -11 -23.0973 126.852 17
 0 -1 12 2810.72 159.462 2
 0 1 12 2483.34 142.488 2
 0 -1 13 3617.98 189.866 2
 0 1 13 3376.65 173.268 2
 0 1 14 41.5859 30.1412 2
 0 -1 14 3.75281 37.5712 2
 0 -1 15 328.452 74.4983 2
 0 1 15 194.378 60.0783 2
 0 -1 16 136.93 64.6021 2
 0 -1 17 3070.26 206.553 2
 0 1 -18 942.894 54.8446 14
 0 1 -18 931.489 56.9076 11
 0 -1 -18 973.376 58.9115 11
 0 -1 18 1070.67 126.351 2
 0 -1 19 -21.4271 42.9344 2
 0 -1 -19 16.1669 21.9713 11
 0 1 -19 15.1997 20.4883 14
 0 1 -19 -32.0773 23.2011 11
 0 -1 -20 170.318 31.4815 11
 0 1 -20 120.368 26.4819 11
 0 1 -20 141.452 29.0421 14
 0 1 -21 340.607 35.4376 11
 0 1 -21 366.876 36.3769 14
 0 -1 -21 334.942 37.8933 11
 0 1 -22 139.474 25.3974 11
 0 -1 -22 146.573 26.9317 11
 0 1 -22 112.409 25.1666 14
 0 -1 -23 111.842 22.198 11
 0 1 -23 122.086 20.6693 11
 0 1 -23 111.724 20.8061 14
 0 1 -24 27.1886 13.4549 14
 0 2 0 503031 1975.27 1
 0 2 1 25447.8 472.799 1
 0 -2 -1 25477.4 595.77 15
 0 -2 -2 40791.5 748.813 15
 0 2 2 39856.8 645.436 1
 0 2 3 126439 1253.62 1
 0 -2 -3 126021 1308.62 15
 0 -2 -4 31.0196 41.2722 15
 0 -2 -4 -27.6265 64.2662 9
 0 2 4 93.02 51.6811 1
 0 2 5 11801.3 458.371 1
 0 -2 -5 11209 426.12 15
 0 -2 -5 11844.6 521.462 9
 0 2 6 15502.7 575.828 1
 0 -2 -6 15650 637.357 9
 0 -2 -6 15639.4 533.075 15
 0 2 7 38.8196 57.7922 1
 0 -2 -7 65.7865 80.9228 9
 0 2 8 19047.5 738.541 1
 0 -2 -9 78916.1 750.718 5
 0 2 9 80299.8 1634.06 1
 0 -2 -9 79111.3 768.204 6
 0 -2 9 79168.8 722.82 2
 0 -2 -10 9002.55 276.729 6
 0 2 -10 9418.53 647.104 17
 0 2 10 9229.25 597.953 1
 0 -2 10 9468.92 267.68 2
 0 -2 -10 9734.17 276.657 5
 0 -2 11 1952.22 130.635 2
 0 -2 12 58.8998 38.6709 2
 0 -2 13 72.9473 47.9102 2
 0 -2 14 9175.16 325.572 2
 0 -2 15 -20.3398 45.6257 2
 0 -2 16 673.099 102.965 2
 0 2 -17 12164.7 187.358 11
 0 -2 17 12699.7 420.285 2
 0 -2 -17 12579.9 198.944 11
 0 2 -17 12266.3 188.222 14
 0 -2 -18 2259.26 88.1275 11
 0 2 -18 2193.18 81.9129 11
 0 -2 18 1953.24 171.359 2
 0 2 -18 2221.84 82.4367 14
 0 -2 -19 1815.52 79.1959 11
 0 2 -19 1850.72 75.4012 11
 0 2 -19 1858.58 75.8432 14
 0 2 -20 243.396 33.5694 14
 0 2 -20 248.542 32.7527 11
 0 -2 -20 217.83 33.9444 11
 0 2 -21 332.058 35.2157 14
 0 -2 -21 347.989 37.1527 11
 0 2 -22 19.8195 19.4155 14
 0 -2 -22 4.92307 20.9808 11
 0 2 -23 161.49 22.9291 14
 0 3 0 -21.242 43.8042 1
 0 -3 -1 68709.7 1231.52 15
 0 3 1 71428.2 949.636 1
 0 -3 -2 5220.58 345.039 15
 0 3 2 6475.89 304.727 1
 0 -3 -3 45863.6 980.987 15
 0 3 3 47043.1 862.051 1
 0 3 4 39915.3 850.584 1
 0 -3 -4 39618.2 923.828 15
 0 -3 -4 38604.1 1033.95 9
 0 -3 -5 3151.78 312.357 9
 0 3 5 3016.96 251.055 1
 0 3 6 4758.33 338.323 1
 0 -3 -6 5070.93 404.569 9
 0 3 7 2335.32 258.272 1
 0 -3 -7 1741.92 119.932 5
 0 -3 -7 1919.49 268.735 9
 0 -3 -7 1930.22 118.675 6
 0 -3 -8 37169 1210.93 9
 0 -3 -8 35642.1 528.64 6
 0 -3 8 36117.1 480.668 2
 0 -3 -8 34273.4 538.908 5
 0 3 8 36747.9 1082.32 1
 0 -3 -9 24236.1 459.089 6
 0 -3 9 24931.2 422.531 2
 0 -3 -9 24888.3 1045.36 9
 0 3 9 25219.1 956.049 1
 0 -3 -9 23613.5 465.446 5
 0 -3 10 72.2587 32.102 2
 0 -3 -10 122.336 53.3957 6
 0 -3 -11 816.185 104.931 6
 0 -3 11 830.315 91.8028 2
 0 -3 -11 777.868 97.315 5
 0 -3 12 255.992 60.9182 2
 0 -3 -12 198.35 54.5827 5
 0 -3 13 1710.67 139.624 2
 0 -3 14 66.7667 46.8831 2
 0 -3 15 874.05 112.729 2
 0 -3 16 4624.59 252.626 2
 0 -3 17 162.295 25.9025 7
 0 -3 17 108.872 42.4107 2
 0 3 -17 194.051 28.5012 14
 0 -3 -17 166.273 28.3867 11
 0 -3 -18 380.209 40.7906 11
 0 3 -18 396.667 38.375 14
 0 -3 -19 964.16 59.5245 11
 0 3 -19 999.401 56.7231 14
 0 3 -20 113.349 25.4221 14
 0 3 -21 243.222 30.8224 14
 0 3 -22 -9.0949 17.218 14
 0 3 -23 526.58 32.7591 14
 0 -4 0 11970.1 633.153 15
 0 -4 -1 21673.5 828.496 15
 0 -4 -2 19965.3 789.372 15
 0 -4 -4 1571.51 112.007 5
 0 -4 -4 1597.77 105.497 6
 0 -4 -5 9982.89 290.21 5
 0 -4 -5 9474.15 262.857 6
 0 -4 -6 21789.2 446.573 5
 0 -4 -6 21213.3 408.801 6
 0 -4 -7 49.0595 39.0282 6
 0 -4 -7 -33.9797 41.5599 5
 0 -4 -8 24121 508.178 5
 0 -4 -8 25377.6 486.592 6
 0 -4 -9 2170.69 161.85 5
 0 -4 -9 2510.06 164.411 6
 0 -4 -10 2.30108 41.9463 5
 0 -4 -10 133.641 46.0316 6
 0 -4 -11 357.88 75.1154 6
 0 -4 -11 300.133 71.4213 5
 0 -4 -12 -18.0445 48.0336 5
 0 -4 -12 -32.0191 47.6238 6
 0 -4 13 5387.66 248.821 2
 0 -4 -13 5424 278.79 5
 0 -4 14 6025.46 273.088 2
 0 -4 15 580.148 90.9665 2
 0 4 -15 515.898 40.3168 14
 0 -4 -15 561.577 43.8635 11
 0 -4 15 516.99 40.9849 7
 0 -4 16 3246.93 209.188 2
 0 4 -16 3370.78 97.9 14
 0 -4 16 3204.59 96.6707 7
 0 4 -17 754.363 48.1502 14
 0 -4 17 677.843 46.9172 7
 0 -4 18 18.1602 19.166 7
 0 4 -18 9.10355 19.0651 14
 0 4 -19 27.7655 19.6185 14
 0 -4 19 31.9116 19.7906 7
 0 4 -20 691.095 43.0516 14
 0 4 -21 430.958 34.1896 14
 0 4 -22 745.693 37.5791 14
 0 -5 0 -8.49255 37.2039 4
 0 -5 -1 9670.04 301.553 4
 0 -5 1 9196.45 659.459 15
 0 -5 1 9617.63 306.196 4
 0 -5 -2 11313.7 303.447 6
 0 -5 -2 11706.9 328.263 4
 0 -5 2 11904.6 342.169 4
 0 -5 -3 26505.5 493.286 5
 0 -5 -3 26281.9 469.211 6
 0 -5 -3 26102.8 493.761 4
 0 -5 -4 3899.38 187.36 6
 0 -5 -4 4099.64 203.806 5
 0 -5 -5 4043.75 209.092 5
 0 -5 -5 4316.62 200.858 6
 0 -5 -6 7075.34 263.245 6
 0 -5 -6 7227.4 289.254 5
 0 -5 -7 6430.87 282.528 5
 0 -5 -7 6060.49 252.186 6
 0 -5 -8 752.655 95.1541 6
 0 -5 -8 648.436 102.212 5
 0 -5 -9 1912.53 167.58 5
 0 -5 -9 1749.21 150.136 6
 0 -5 -10 716.818 103.612 6
 0 -5 -10 761.564 112.529 5
 0 -5 -11 5480.01 280.889 6
 0 -5 -12 916.954 124.356 6
 0 -5 14 722.363 48.7379 7
 0 -5 15 32.4199 19.0435 7
 0 5 -15 82.7663 22.7577 14
 0 -5 16 70.8401 22.493 7
 0 5 -16 97.8279 24.2542 14
 0 -5 17 36.3258 22.264 7
 0 5 -17 39.9253 18.8839 14
 0 5 -18 678.672 42.5356 14
 0 -5 18 702.486 45.5881 7
 0 5 -19 755.375 42.4901 14
 0 -5 19 708.615 42.8846 7
 0 -5 20 313.34 27.8333 7
 0 -5 -20 293.813 28.3486 8
 0 5 -20 285.737 27.1645 14
 0 -5 -21 149.73 19.6141 8
 0 5 -21 199.634 21.6344 14
 0 -6 0 9808.3 351.087 4
 0 -6 1 1052.54 124.679 4
 0 -6 -1 1157.09 122.422 4
 0 -6 -2 459.997 79.3143 4
 0 -6 2 494.883 91.5624 4
 0 -6 3 2359.85 180.738 4
 0 -6 4 4071.38 240.473 4
 0 -6 5 5932.8 293.705 4
 0 -6 -5 6102.69 264.991 6
 0 -6 -6 3681.42 210.934 6
 0 -6 -7 290.5 72.8463 6
 0 -6 -8 9583.09 358.339 6
 0 -6 -9 1.80057 42.1436 6
 0 -6 -10 1895.67 174.172 6
 0 -6 11 417.553 36.5585 7
 0 -6 -11 376.004 79.5964 6
 0 -6 12 4950.32 119.089 7
 0 -6 -12 4753.9 276.967 6
 0 -6 13 9904.53 168.756 7
 0 -6 14 56.9236 24.1199 7
 0 -6 15 2183.86 79.4398 7
 0 -6 16 185.085 27.7587 7
 0 -6 17 49.2443 22.1714 7
 0 -6 18 330.297 31.5303 7
 0 -6 19 1280.65 49.6052 7
 0 -6 20 281.168 23.7535 7
 0 -7 0 55.9471 44.7484 4
 0 -7 1 1605.53 160.077 4
 0 -7 -1 1769.19 166.74 4
 0 -7 2 3448.33 240.148 4
 0 -7 3 7774.45 355.889 4
 0 -7 4 390.614 94.5076 4
 0 -7 5 11.3957 51.3446 4
 0 -7 6 311.336 91.1114 4
 0 -7 7 3031.55 237.046 4
 0 -7 8 249.236 29.3144 7
 0 -7 8 288.101 30.9161 10
 0 -7 8 344.155 90.0378 4
 0 -7 9 6691.73 134.472 7
 0 -7 9 6559.77 346.756 4
 0 -7 9 6391.51 130.793 10
 0 -7 10 520.289 41.6826 7
 0 -7 10 588.315 42.2687 10
 0 -7 11 -28.1808 19.1154 7
 0 -7 11 18.5124 18.1114 10
 0 -7 12 -15.952 20.0506 7
 0 -7 13 2195.89 78.9045 7
 0 -7 14 -12.6751 20.536 7
 0 -7 15 1543.04 62.8411 7
 0 -7 16 83.2073 20.5077 7
 0 -7 17 96.1665 19.9729 7
 0 -7 18 9.67397 13.8575 7
 0 -8 0 14983 204.818 10
 0 -8 -1 -36.6875 22.1162 10
 0 -8 1 -65.2484 63.5697 4
 0 -8 1 8.95867 18.1462 10
 0 -8 2 625.173 45.2224 10
 0 -8 -2 671.516 45.4889 10
 0 -8 2 550.067 99.7564 4
 0 -8 -3 820.278 50.0391 10
 0 -8 3 906.855 53.4831 10
 0 -8 4 -5.12189 21.1271 10
 0 -8 4 111.267 75.3871 4
 0 -8 5 226.902 30.6238 10
 0 -8 5 220.49 73.3069 4
 0 -8 6 959.441 55.355 10
 0 -8 6 925.537 136.797 4
 0 -8 7 510.693 42.2068 10
 0 -8 8 128.814 25.4679 10
 0 -8 9 -16.9828 19.0605 10
 0 -8 10 129.128 24.5264 10
 0 -8 10 115.725 23.0008 7
 0 -8 11 772.728 44.8164 10
 0 -8 11 742.211 44.3473 7
 0 -8 12 -2.35754 16.8657 7
 0 -8 12 -4.8604 15.4393 10
 0 -8 13 119.821 21.2286 7
 0 -8 14 24.6611 16.2991 7
 0 -8 15 687.252 36.9132 7
 0 -8 16 352.293 25.5969 7
 0 -9 0 9.07251 18.2065 10
 0 -9 1 -16.2873 21.2032 10
 0 -9 -1 -10.2508 20.907 10
 0 -9 2 184.49 27.9827 10
 0 -9 -2 167.273 25.7109 10
 0 -9 3 469.341 38.9413 10
 0 -9 -3 574.526 40.6043 10
 0 -9 4 674.465 45.6854 10
 0 -9 5 312.22 33.8119 10
 0 -9 6 906.969 51.0144 10
 0 -9 7 143.254 25.8761 10
 0 -9 8 23.1956 19.5205 10
 0 -9 9 31.0017 16.2038 10
 0 -9 10 6.79765 16.0611 10
 0 -9 11 79.2801 17.698 10
 0 -9 12 483.706 28.1791 10
 0 -10 0 4671.36 96.3938 10
 0 -10 -1 23.0993 16.2627 10
 0 -10 1 10.3791 16.8021 10
 0 -10 -2 102.184 19.4521 10
 0 -10 2 71.5366 19.8976 10
 0 -10 3 10.4922 15.9574 10
 0 -10 4 79.7948 19.4574 10
 0 -10 5 733.201 39.0243 10
 0 -10 6 29.4242 15.7622 10
 0 -10 7 -3.0214 15.0817 10
 0 -10 8 10.4828 12.8631 10
 1 0 -24 -4.53879 14.6821 14
 1 0 -23 131.476 22.1503 11
 1 0 -23 151.834 24.3913 14
 1 0 -22 -26.8066 20.9747 14
 1 0 -22 -16.3848 21.5657 11
 1 0 -21 1033.78 57.5266 11
 1 0 -21 1007.31 56.269 14
 1 0 -20 -0.12647 19.481 14
 1 0 -20 -29.6111 22.7358 11
 1 0 -19 10799.8 183.836 11
 1 0 -19 10656.6 181.372 14
 -1 0 19 10748.8 397.664 2
 1 0 -18 -1.64745 18.1721 14
 1 0 -18 -2.59267 20.7304 11
 -1 0 18 -3.47325 44.6855 2
 -1 0 17 312.763 78.7213 2
 -1 0 16 -31.7366 47.8361 2
 -1 0 15 7167.9 293.046 2
 -1 0 14 15.9998 35.0983 2
 -1 0 13 6710.08 255.664 2
 -1 0 12 -17.0194 39.8466 2
 -1 0 11 10894 287.723 2
 -1 0 11 11108.3 675.609 1
 1 0 -10 4.07799 65.3191 17
 -1 0 10 -21.1226 38.0294 2
 1 0 -9 26590.3 851.754 17
 1 0 -8 188.718 80.6417 17
 1 0 -7 1249.96 155.999 17
 1 0 -6 24.781 49.3582 17
 1 0 -5 81200.6 979.812 17
 1 0 -4 -44.4205 36.6931 17
 -1 0 4 19.8057 45.2886 1
 -1 0 3 12311.5 334.302 1
 1 0 -3 13546.5 275.836 17
 1 0 -2 3.6116 15.4058 9
 -1 0 2 17.3814 28.6184 1
 -1 0 1 102535 734.901 1
 -1 0 1 102026 630.833 15
 -1 0 0 14.9843 21.2119 15
 -1 0 -5 9012.75 466.032 17
 -1 0 -6 0.28256 85.0988 17
 -1 0 -7 49152.2 1238.15 17
 -1 0 -8 -33.5185 92.8346 17
 -1 0 -9 34788.9 1189.11 17
 1 0 10 28.3589 28.2421 2
 -1 0 -10 39.1921 27.1413 16
 -1 0 -11 4114.18 471.21 17
 1 0 11 4424.07 183.496 2
 1 0 12 25.4886 31.9159 2
 1 0 13 5586.74 227.553 2
 1 0 14 -25.5844 34.131 2
 1 0 15 2171.18 158.88 2
 1 0 16 -0.90204 45.427 2
 1 0 17 3643.63 218.085 2
 -1 0 -17 3669.13 109.412 11
 -1 0 -17 3638.54 90.1352 13
 -1 0 -17 3422.7 97.6921 14
 1 0 18 -79.0506 62.381 2
 -1 0 -18 17.9358 20.6901 11
 -1 0 -19 3134.09 101.796 11
 -1 0 -20 19.8622 24.272 11
 -1 0 -21 -33.9565 25.7184 11
 -1 0 -22 13.7715 22.1435 11
 -1 0 -23 344.859 29.832 11
 1 1 -24 61.6921 18.3957 14
 1 1 -23 461.861 36.1894 14
 1 1 -22 269.787 32.4526 14
 1 -1 -22 291.003 33.16 11
 1 -1 -21 15.9632 18.6634 14
 1 -1 -21 -2.85461 23.8294 11
 1 1 -21 -30.8638 22.1247 11
 1 1 -21 11.9252 21.0457 14
 1 1 -20 2853.41 91.8022 11
 1 1 -20 2878.96 94.4104 14
 1 -1 -20 2863.85 97.6007 11
 1 -1 -20 2781.38 90.2828 14
 1 -1 -19 52.9396 25.0425 11
 -1 -1 19 74.9773 47.9851 2
 1 -1 -19 50.1867 23.4769 14
 1 1 -19 24.7182 21.2486 11
 1 1 -19 7.13266 21.6119 14
 -1 -1 18 -17.607 55.6428 2
 1 1 -18 56.1001 21.0675 11
 1 -1 -18 70.0034 21.1597 14
 1 1 -18 32.6192 19.6156 14
 1 -1 -18 110.93 29.6141 11
 -1 -1 17 1083.8 131.333 2
 -1 -1 16 1605.43 151.214 2
 -1 1 15 127.823 52.335 2
 -1 -1 15 183.113 63.6984 2
 -1 1 14 2199.63 151.381 2
 -1 -1 14 2436.78 167.98 2
 -1 -1 13 10381.1 324.766 2
 -1 1 13 10068.5 301.913 2
 -1 1 12 3968.94 179.035 2
 -1 -1 12 3998.26 193.424 2
 -1 1 11 1139.89 228.293 1
 -1 1 11 1298.21 97.0724 2
 -1 -1 11 1450.75 113.039 2
 -1 -1 10 3088 149.961 2
 -1 1 10 2849.1 326.677 1
 -1 1 9 302.982 114.538 1
 1 1 -9 284.213 117.206 17
 1 1 -8 416.859 110.277 17
 -1 1 8 617.583 130.677 1
 1 1 -7 -44.1905 59.0573 17
 -1 1 7 85.1838 83.1292 1
 1 1 -6 2068.71 193.396 17
 -1 1 6 2215.87 215.015 1
 1 -1 -5 51175.6 886.609 9
 1 -1 -4 36648 691.39 9
 1 -1 -3 119498 1129.4 9
 -1 -1 2 27276.6 324.684 1
 -1 -1 0 74955.6 703.658 9
 -1 -1 -1 34465.1 571.253 17
 -1 -1 -2 87771.3 1054 15
 -1 -1 -2 89815.1 1050.49 17
 -1 -1 -3 61.2118 57.5464 15
 -1 -1 -3 126.677 82.3507 17
 -1 -1 -4 185573 1732.45 15
 -1 -1 -5 130230 1715.77 17
 -1 -1 -5 126841 1555.75 15
 -1 -1 -6 14052.1 617.101 17
 -1 -1 -7 11542 596.91 17
 -1 -1 -8 11891.5 652.805 17
 -1 1 -8 10522.8 640.289 17
 -1 1 -9 16047.2 835.444 17
 -1 1 -9 16077.8 296.844 16
 -1 -1 -9 15623.3 796.118 17
 -1 1 -10 29820.7 424.881 16
 -1 1 -10 28672.6 1180.4 17
 -1 -1 -10 30019.8 1177.01 17
 1 -1 10 29484.2 457.171 2
 1 1 10 28619.6 430.321 2
 1 1 11 4633.09 183.683 2
 -1 1 -11 4805.8 521.134 17
 1 -1 11 4502.19 192.44 2
 1 -1 12 8443.12 275.502 2
 1 1 12 8405.63 261.545 2
 1 1 13 12465.5 333.94 2
 1 -1 13 12219.4 346.275 2
 1 -1 14 131.267 50.9112 2
 1 1 14 55.7881 29.567 2
 1 -1 15 4600.38 232.379 2
 1 -1 16 6207.73 280.853 2
 1 -1 17 148.044 53.5837 2
 -1 1 -17 185.582 28.2786 14
 -1 1 -17 152.419 21.4694 13
 -1 1 -17 212.816 33.8334 11
 -1 -1 -17 207.215 31.9474 11
 -1 1 -18 965.187 59.5592 11
 -1 1 -18 992.769 55.501 14
 1 -1 18 897.86 113.494 2
 -1 -1 -18 1022.19 61.1216 11
 -1 1 -19 2654.31 92.6055 11
 -1 1 -19 2523.14 85.8686 14
 -1 -1 -19 2389.37 90.143 11
 -1 1 -20 18.2583 21.7562 11
 -1 -1 -20 -32.4193 27.0471 11
 -1 1 -20 -8.04932 18.7672 14
 -1 1 -21 419.742 39.174 11
 -1 -1 -21 389.523 39.6275 11
 -1 1 -21 389.454 34.9793 14
 -1 1 -22 216.319 25.6796 14
 -1 -1 -22 253.054 31.6581 11
 -1 1 -22 238.018 29.6574 11
 -1 -1 -23 361.327 31.0709 11
 -1 1 -23 351.418 27.4256 14
 -1 1 -23 392.603 30.0681 11
 1 2 -24 748.514 37.7365 14
 1 2 -23 266.565 28.9377 14
 1 2 -22 1326.04 59.4235 14
 1 2 -21 215.264 30.4638 14
 1 -2 -21 248.604 34.5132 11
 1 2 -20 -23.4965 24.2102 14
 1 -2 -20 -1.35186 22.8456 11
 1 2 -19 3486.89 105.053 14
 -1 -2 19 3677.43 236.153 2
 1 -2 -19 3460.96 107.466 11
 1 -2 -18 85.5422 27.6307 11
 -1 -2 18 79.0646 50.4251 2
 1 2 -18 46.5513 21.3952 14
 -1 -2 17 4636.02 261.352 2
 -1 -2 16 2180.2 175.519 2
 -1 -2 15 4434.18 242.108 2
 -1 -2 14 7811.8 305.56 2
 -1 -2 13 5530.82 246.541 2
 -1 -2 12 3055 179.113 2
 -1 2 11 62.4737 73.4564 1
 1 -2 -11 30.1288 34.2529 5
 -1 -2 11 -1.12588 37.3064 2
 1 -2 -10 10437.8 277.334 5
 -1 -2 10 10878.7 295.636 2
 -1 2 10 10145.3 624.56 1
 1 -2 -10 10243 630.966 9
 -1 -2 9 18139.9 357.251 2
 1 -2 -9 18308 349.211 5
 -1 2 9 18824.3 801.241 1
 1 -2 -9 18416.1 794.418 9
 1 -2 -8 4017.08 353.113 9
 -1 2 8 3762.49 337.469 1
 -1 2 7 5662.5 384.254 1
 1 -2 -7 5509.26 388.439 9
 1 -2 -6 4310.6 325.594 9
 -1 2 6 4221.52 309.493 1
 -1 2 5 1848.52 196.15 1
 1 -2 -5 1768.18 210.463 9
 1 -2 -4 9442.83 433.509 9
 -1 2 4 9412.42 406.561 1
 1 -2 -4 9934.39 291.991 15
 -1 2 3 50212.5 880.441 1
 1 -2 -3 48938.2 645.036 15
 1 -2 -2 63535.3 783.733 15
 -1 2 2 63463.8 956.025 1
 -1 2 1 37049.4 715.827 1
 -1 -2 0 29702.6 739.212 15
 1 2 0 29331 282.617 1
 -1 2 0 28620.7 622.311 1
 1 2 1 30312.2 406.227 1
 -1 -2 -1 30594.6 668.962 9
 -1 -2 -1 29175.2 731.705 15
 -1 -2 -2 121295 1478.77 15
 -1 -2 -2 120948 1435.07 9
 1 2 2 122407 1010.81 1
 -1 -2 -3 44038.1 925.5 9
 1 2 3 44486.5 710.249 1
 -1 -2 -3 43330.6 917.859 15
 -1 -2 -4 6783.92 373.485 15
 -1 -2 -5 835.565 145.774 15
 -1 -2 -6 29976 865.349 15
 -1 -2 -7 11024.4 547.906 15
 -1 2 -8 52540.5 535.822 16
 -1 -2 -8 50811.4 593.002 6
 -1 -2 -9 750.77 83.4749 5
 1 -2 9 788.354 77.7958 2
 -1 -2 -9 758.285 83.6012 6
 -1 2 -10 4758.45 507.113 17
 -1 -2 -10 5336.74 219.034 6
 1 -2 10 5217.07 198.656 2
 1 2 10 4568.21 428.427 1
 1 -2 11 110.736 42.3247 2
 1 -2 12 2827.47 166.492 2
 1 -2 13 1896.43 144.349 2
 1 -2 14 20225.1 476.567 2
 1 -2 15 3174.67 199.156 2
 1 -2 16 14028 426.535 2
 1 -2 17 407.247 79.8547 2
 -1 -2 -17 319.53 36.6643 11
 -1 2 -17 443.072 35.2648 13
 -1 2 -17 423.084 38.3371 14
 -1 -2 -18 90.4907 27.1373 11
 -1 2 -18 67.2349 24.242 14
 -1 2 -18 101.829 27.1032 11
 -1 2 -19 46.3966 22.2538 14
 -1 2 -19 92.8555 26.6441 11
 -1 -2 -19 68.0608 27.0619 11
 -1 2 -20 2601.47 86.509 11
 -1 2 -20 2490.45 82.3773 14
 -1 -2 -20 2491.65 88.6409 11
 -1 2 -21 468.28 38.0519 14
 -1 -2 -21 421.654 39.6453 11
 -1 2 -21 424.443 36.8082 11
 -1 2 -22 1503.49 56.7905 11
 -1 -2 -22 1571.93 63.2499 11
 -1 2 -22 1413.5 55.5233 14
 -1 2 -23 32.9011 15.6733 11
 -1 2 -23 70.2854 16.699 14
 1 3 -23 137.221 21.4223 14
 1 3 -22 319.011 31.4784 14
 1 3 -21 31.71 22.9061 14
 1 3 -20 222.979 31.6799 14
 -1 -3 19 774.45 49.6442 7
 1 3 -19 864.704 53.853 14
 -1 -3 18 939.88 55.0112 7
 1 -3 -18 934.655 57.3577 11
 1 3 -18 999.798 57.0364 14
 -1 -3 18 1067.54 132.19 2
 1 -3 -17 23.7382 23.5104 11
 -1 -3 17 2.67434 19.3188 7
 1 3 -17 -15.1423 19.8795 14
 -1 -3 16 2552.17 192.979 2
 -1 -3 15 2158.32 172.596 2
 -1 -3 14 12763.1 400.505 2
 1 -3 -13 4599 231.816 5
 -1 -3 13 4612.97 232.393 2
 1 -3 -12 4248.43 217.175 5
 -1 -3 12 4114.76 209.48 2
 1 -3 -11 13489.9 367.407 5
 -1 -3 11 14584.9 372.307 2
 -1 3 10 724.383 177.154 1
 1 -3 -10 492.801 69.7247 5
 1 -3 -10 455.91 149.424 9
 1 -3 -10 590.405 80.1117 6
 -1 -3 10 493.532 69.8307 2
 -1 -3 9 962.611 90.4282 2
 1 -3 -9 901.692 91.821 6
 1 -3 -9 924.189 91.737 5
 1 -3 -9 1140.55 215.864 9
 -1 3 9 989.387 198.79 1
 -1 3 8 3457.67 339.956 1
 1 -3 -8 3250.11 159.042 6
 1 -3 -8 2886.42 152.185 5
 1 -3 -8 3140.36 349.32 9
 -1 -3 8 2894.65 143.25 2
 1 -3 -7 4748.76 185.677 5
 1 -3 -7 5038.26 420.941 9
 -1 3 7 5190.62 399.099 1
 -1 3 6 541.912 133.665 1
 -1 3 5 11852 533.467 1
 -1 3 4 138102 1730.4 1
 -1 3 3 103068 1436.95 1
 1 -3 -2 10938.9 444.839 15
 -1 3 2 11508 464.847 1
 -1 3 1 4181.98 276.535 1
 -1 -3 0 54813.3 1220.33 15
 -1 3 0 56396.4 991.58 1
 -1 -3 -1 5284.6 384.716 15
 -1 -3 -2 10423.2 523.345 15
 -1 -3 -3 11.5324 67.4887 9
 -1 -3 -3 -28.1325 73.1357 15
 -1 -3 -4 1116.59 186.442 9
 -1 -3 -4 1191.52 188.676 15
 -1 -3 -5 9049.16 540.507 9
 -1 -3 -5 9541.91 522.046 15
 -1 -3 -6 37059.9 1146.62 9
 -1 -3 -6 38668 510.512 6
 -1 -3 -6 38041.6 1060.33 15
 -1 -3 -6 35424.9 541.727 5
 1 -3 7 11116 253.669 2
 -1 -3 -7 11220.3 666.938 9
 -1 -3 -7 11499 603.421 15
 -1 -3 -7 11601 294.866 6
 -1 -3 -7 10854 312.94 5
 -1 -3 -8 216.06 50.8067 6
 -1 -3 -8 225.243 125.245 9
 1 -3 8 240.411 43.3394 2
 -1 -3 -8 171.674 49.2717 5
 -1 -3 -9 519.391 82.8312 5
 1 -3 9 589.136 69.0775 2
 -1 -3 -9 502.121 72.6854 6
 1 -3 10 16426.1 361.918 2
 -1 -3 -10 16315.7 421.018 5
 -1 -3 -10 16300.4 409.261 6
 1 -3 11 2419.39 147.222 2
 -1 -3 -11 2503.12 171.842 6
 1 -3 12 4667.34 214.549 2
 1 -3 13 343.908 69.7768 2
 1 -3 14 282.656 66.456 2
 1 -3 15 193.284 61.9696 2
 -1 -3 -16 2241.11 84.2039 11
 1 -3 16 2287.8 175.636 2
 -1 3 -16 2237.57 72.1228 13
 -1 3 -16 2199.76 79.646 14
 -1 3 -17 906.498 53.9507 14
 -1 -3 -17 879.118 55.8888 11
 1 -3 17 824.15 108.021 2
 -1 3 -18 2756.68 88.8454 14
 -1 -3 -18 2683.67 94.3611 11
 -1 -3 -19 371.69 39.2959 11
 -1 3 -19 396.29 37.191 11
 -1 3 -19 408.881 37.9942 14
 -1 3 -20 188.606 28.4434 14
 -1 -3 -20 218.648 31.4807 11
 -1 3 -20 184.776 26.7062 11
 -1 3 -21 215.906 26.3827 14
 -1 3 -22 -10.2792 16.401 14
 1 4 -22 6.84993 15.6124 14
 1 -4 -22 -1.65841 15.8838 8
 1 4 -21 142.324 23.2693 14
 -1 -4 20 -39.1483 21.5752 7
 1 4 -20 11.2066 17.7947 14
 1 4 -19 1076.46 55.1587 14
 -1 -4 19 1010.5 56.1185 7
 1 4 -18 430.538 38.6351 14
 -1 -4 18 397.843 38.4996 7
 -1 -4 17 616.903 101.597 2
 -1 -4 17 679.579 48.5935 7
 1 4 -17 613.719 44.6571 14
 -1 -4 16 149.727 58.568 2
 -1 -4 16 70.1366 21.7432 7
 1 4 -16 109.087 22.6862 14
 -1 -4 15 142.065 52.0479 2
 1 -4 -15 237.54 81.2964 5
 1 -4 -14 61.0909 53.1123 5
 -1 -4 14 14.2132 35.5316 2
 1 -4 -13 5320.05 270.624 5
 1 -4 -12 2136.45 168.16 5
 1 -4 -11 6325.99 279.824 5
 1 -4 -10 9271.51 327.097 5
 1 -4 -10 9530.36 321.027 6
 1 -4 -9 1320.88 118.112 6
 1 -4 -9 1094.08 115.359 5
 1 -4 -8 3346.41 184.015 5
 1 -4 -8 3542.35 181.217 6
 1 -4 -7 935.202 97.9064 5
 1 -4 -7 1024.93 95.4128 6
 1 -4 -6 106812 892.579 6
 1 -4 -6 108055 947.216 5
 1 -4 -5 25199.5 410.444 6
 1 -4 -5 25826.6 442.006 5
 -1 -4 4 8351.13 256.621 6
 1 -4 -4 8136.92 239.183 5
 -1 -4 3 6489.53 230.749 4
 -1 -4 2 14562 336.714 4
 -1 -4 1 403.773 60.676 4
 -1 -4 1 372.138 132.901 15
 -1 -4 0 8467.05 561.751 15
 -1 -4 -1 14735 729.812 15
 -1 -4 -1 15526.3 341.708 4
 -1 -4 -2 128.107 35.4313 6
 -1 -4 -2 151.952 42.9898 4
 -1 -4 -2 272.382 133.044 15
 -1 -4 -3 13812.2 318.06 6
 -1 -4 -3 13629.7 694.908 15
 -1 -4 -4 2404.02 304.196 15
 -1 -4 -4 2557.65 141.809 6
 -1 -4 -5 1910.73 283.628 9
 -1 -4 -5 2013.62 130.872 6
 -1 -4 -6 801.958 205.136 9
 -1 -4 -6 525.808 70.3343 6
 -1 -4 -7 1182.21 108.676 6
 -1 -4 -8 4893.24 222.631 6
 -1 -4 -9 571.551 88.1172 6
 -1 -4 -10 78.9945 52.7979 6
 -1 -4 -11 6704.19 296.274 6
 -1 -4 -12 2254.92 180.493 6
 1 -4 13 1713.4 141.061 2
 1 -4 14 4266.4 228.485 2
 1 -4 15 189.555 28.209 7
 -1 4 -15 219.595 31.6928 14
 -1 -4 -15 129.413 26.5269 11
 1 -4 15 140.117 47.5548 2
 1 -4 16 2018.36 164.803 2
 1 -4 16 1950.69 74.4689 7
 -1 4 -16 1976.84 76.0451 14
 -1 -4 -16 1925.95 78.4136 11
 -1 -4 -17 1557.27 69.7361 11
 1 -4 17 1625.48 66.4195 7
 -1 4 -17 1502.95 66.578 14
 -1 4 -18 181.438 29.0684 14
 -1 4 -19 547.561 40.0217 14
 -1 4 -20 596.061 40.1233 14
 -1 4 -21 55.3535 19.2208 14
 -1 4 -22 132.508 18.9351 14
 1 5 -21 120.154 18.6843 14
 1 -5 -21 93.3612 20.129 8
 1 5 -20 844.307 42.4439 14
 -1 -5 20 848.773 45.0586 7
 1 -5 -20 759.522 44.7335 8
 1 -5 -19 11.6426 18.3657 8
 -1 -5 19 22.122 19.215 7
 1 5 -19 24.5332 19.333 14
 -1 -5 18 43.3704 23.225 7
 -1 -5 17 195.491 29.1777 7
 -1 -5 16 1266.82 63.5869 7
 -1 -5 15 2415.61 86.8141 7
 -1 -5 14 3222.5 98.0892 7
 1 -5 -14 2872.21 221.941 5
 1 -5 -13 323.696 72.3696 5
 1 -5 -12 -9.44278 61.7496 5
 1 -5 -11 753.281 107.782 6
 1 -5 -11 617.761 103.854 5
 1 -5 -10 2601.95 194.958 5
 1 -5 -10 2227.19 167.9 6
 1 -5 -9 4248.22 239.329 5
 1 -5 -9 3921.59 215.37 6
 1 -5 -8 136.618 50.5533 6
 1 -5 -8 82.214 44.9214 5
 1 -5 -7 116.518 56.036 5
 1 -5 -6 13866.9 382.142 5
 -1 -5 5 2889.99 174.872 6
 1 -5 -5 2967.9 173.109 5
 -1 -5 5 3108.42 194.946 4
 -1 -5 4 47.1558 31.748 6
 1 -5 -4 -1.92455 34.0874 5
 -1 -5 4 -31.988 43.8355 4
 1 -5 -3 5715.74 217.916 5
 -1 -5 3 5493.53 229.103 6
 -1 -5 3 4995.85 238.155 4
 -1 -5 2 2529.44 154.398 6
 -1 -5 2 2655.8 171.51 4
 -1 -5 1 14777.4 867.641 15
 1 -5 -1 15115.5 366.756 4
 -1 -5 1 15036.7 369.321 6
 -1 -5 1 14965.8 392.345 4
 1 -5 0 50.2394 38.7194 4
 -1 -5 0 39.8897 33.0667 6
 -1 -5 0 103.328 40.7391 4
 -1 -5 -1 1077.53 108.563 4
 -1 -5 -1 1025.28 204.934 15
 -1 -5 -1 851.134 92.9866 6
 1 -5 1 920.418 95.7775 4
 -1 -5 -2 2765.42 364.139 15
 -1 -5 -2 2961.57 166.617 6
 -1 -5 -2 2998.77 178.608 4
 -1 -5 -3 3.97948 31.6202 6
 -1 -5 -4 66.0311 42.2225 6
 -1 -5 -5 3257.06 182.311 6
 -1 -5 -6 9274.88 314.15 6
 -1 -5 -7 24820.3 527.914 6
 -1 -5 -8 45.7195 52.0143 6
 -1 -5 -9 836.481 111.495 6
 -1 -5 -10 2359.99 184.233 6
 -1 -5 -11 1100.73 135.372 6
 -1 -5 -12 709.8 117.319 6
 1 -5 13 2233.17 79.6255 7
 1 -5 14 1976.45 75.9317 7
 -1 5 -15 307.971 32.4216 14
 1 -5 15 276.902 32.4104 7
 1 -5 16 597.351 42.4147 7
 -1 5 -16 548.71 41.6529 14
 1 -5 17 121.318 25.6561 7
 -1 5 -17 128.62 25.0825 14
 -1 5 -18 4390.07 100.734 14
 1 -5 18 4064.06 97.2635 7
 1 -5 19 93.2289 19.5408 7
 -1 5 -19 90.9215 20.4649 14
 -1 5 -20 -17.7018 16.3324 14
 1 -6 -20 130.155 18.2642 8
 1 -6 -19 233.64 24.9283 8
 -1 -6 19 266.32 28.0746 7
 -1 -6 18 279.02 30.841 7
 1 -6 -18 236.032 27.3623 8
 1 -6 -17 185.018 26.7531 8
 -1 -6 17 162.489 27.3431 7
 1 -6 -16 2064.62 75.9244 8
 -1 -6 16 2186.63 79.2317 7
 -1 -6 15 330.617 36.9454 7
 1 -6 -15 340.387 34.4607 8
 1 -6 -14 2533.97 85.9451 8
 -1 -6 14 2419.43 86.1537 7
 -1 -6 13 86.4658 65.9484 4
 -1 -6 13 87.5386 19.9595 10
 -1 -6 13 114.803 26.018 7
 -1 -6 12 -43.2053 21.8509 10
 -1 -6 12 -16.8366 19.964 7
 -1 -6 12 12.9805 52.2508 4
 1 -6 -11 4697.57 282.128 5
 -1 -6 11 4326.73 280.479 4
 -1 -6 10 376.338 94.1231 4
 1 -6 -10 329.676 88.8899 5
 -1 -6 9 528.458 104.026 4
 1 -6 -9 320.054 83.8006 5
 1 -6 -8 110.821 66.8388 5
 -1 -6 8 20.1266 69.0698 4
 -1 -6 7 590.814 108.594 4
 1 -6 -7 729.223 107.246 5
 -1 -6 6 21077 570.924 4
 1 -6 -6 21397.6 530.454 5
 -1 -6 5 11189.9 407.045 4
 1 -6 -5 11821 379.855 5
 -1 -6 4 4861.88 266.315 4
 1 -6 -4 5370.09 246.963 5
 -1 -6 3 2796.51 200.939 4
 -1 -6 2 3488.2 222.538 4
 -1 -6 1 451.129 90.7106 4
 -1 -6 1 443.476 78.338 6
 -1 -6 0 14696.7 404.315 6
 1 -6 0 14680.1 419.294 4
 -1 -6 0 14854.4 443.838 4
 -1 -6 -1 5319.37 244.109 6
 1 -6 1 5214.58 255.611 4
 -1 -6 -1 5524.78 270.202 4
 1 -6 2 945.185 115.23 4
 -1 -6 -2 1004.98 110.819 6
 1 -6 3 3162.51 207.817 4
 -1 -6 -3 3040.05 192.733 6
 -1 -6 -4 2052.58 158.76 6
 -1 -6 -5 2310.05 169.95 6
 -1 -6 -6 8169.71 324.15 6
 -1 -6 -7 24.5189 47.0502 6
 -1 -6 -8 4131.4 244.059 6
 -1 -6 -9 168.816 74.2728 6
 -1 -6 -10 5604.77 297.402 6
 1 -6 11 75.456 22.0705 7
 -1 -6 -11 96.1974 63.5506 6
 1 -6 12 1915.79 74.9069 7
 -1 -6 -12 1844.56 178.843 6
 1 -6 13 2651.97 87.5581 7
 1 -6 14 1512.86 67.7875 7
 1 -6 15 427.326 38.9587 7
 1 -6 16 175.853 27.1644 7
 1 -6 17 548.091 38.124 7
 -1 6 -17 575.617 35.9251 14
 1 -6 18 64.5057 17.143 7
 -1 6 -18 42.197 14.7479 14
 1 -6 19 -4.83564 12.8785 7
 -1 6 -19 4.11041 12.0397 14
 -1 -7 18 -19.8322 15.4719 7
 -1 -7 17 44.8103 18.8474 7
 -1 -7 16 8.15592 17.979 7
 -1 -7 15 113.69 24.6647 7
 -1 -7 14 1146.1 57.2263 7
 -1 -7 14 1187.61 52.6759 10
 -1 -7 13 81.4234 21.1177 10
 -1 -7 13 123.189 25.2747 7
 -1 -7 12 71.7838 21.5064 10
 -1 -7 12 121.328 25.8213 7
 -1 -7 11 559.298 42.5602 7
 -1 -7 11 544.637 109.658 4
 -1 -7 11 559.107 41.7183 10
 -1 -7 10 8689.86 399.175 4
 -1 -7 10 8632.51 154.251 7
 -1 -7 10 8667.19 152.218 10
 -1 -7 9 427.181 37.7354 10
 -1 -7 9 512.258 113.182 4
 -1 -7 8 3356.62 253.374 4
 -1 -7 8 3504.41 98.636 10
 -1 -7 7 5710.97 327.395 4
 -1 -7 6 8711.99 396.518 4
 -1 -7 5 30.7581 55.4264 4
 -1 -7 4 773.161 124.594 4
 -1 -7 3 13268.2 477.303 4
 -1 -7 2 996.461 132.36 4
 -1 -7 1 1551.65 163.957 4
 -1 -7 0 49.1077 53.6829 4
 1 -7 1 1168.64 140.705 4
 1 -7 2 -11.8739 54.3861 4
 1 -7 3 1347.68 152.483 4
 -1 -7 -3 1090.77 126.538 6
 -1 -7 -4 546.668 95.4252 6
 1 -7 4 585.948 110.06 4
 1 -7 5 2082.31 193.192 4
 -1 -7 -5 2187.76 178.485 6
 1 -7 6 2289.47 199.846 4
 -1 -7 -6 2316.87 188.715 6
 -1 -7 -7 1644.57 160.752 6
 1 -7 7 1660.42 67.0965 10
 1 -7 7 1608.14 65.587 7
 1 -7 8 107.556 55.0525 4
 1 -7 8 89.1159 22.0822 7
 -1 -7 -8 141.997 66.2423 6
 1 -7 8 100.835 23.4024 10
 1 -7 9 935.576 50.3327 10
 1 -7 9 822.261 49.5194 7
 -1 -7 -9 653.5 108.648 6
 1 -7 9 933.27 142.443 4
 -1 -7 -10 1171.79 146.751 6
 1 -7 10 1071.07 56.5837 7
 1 -7 10 1058.68 141.233 4
 1 -7 11 320.625 33.3895 7
 1 -7 12 -4.51251 19.1042 7
 1 -7 13 282.274 32.6298 7
 1 -7 14 63.2253 24.3072 7
 1 -7 15 1.35822 18.0472 7
 1 -7 16 71.4564 19.4364 7
 1 -7 17 20.5046 15.1003 7
 -1 -8 16 209.613 21.6915 7
 -1 -8 15 106.717 18.4392 7
 -1 -8 14 -1.96079 14.5661 10
 -1 -8 14 14.2033 14.5441 7
 -1 -8 13 14.4537 16.3173 10
 -1 -8 13 -21.2103 17.0531 7
 -1 -8 12 30.9272 18.2615 7
 -1 -8 12 90.8119 23.4763 10
 -1 -8 11 2542.1 78.3823 10
 -1 -8 10 367.427 35.9384 10
 -1 -8 9 4023.97 103.633 10
 -1 -8 8 16.3595 20.2774 10
 -1 -8 7 6582.37 137.022 10
 -1 -8 6 403.985 38.9303 10
 -1 -8 6 359.556 90.4894 4
 -1 -8 5 364.731 90.8042 4
 1 -8 -5 344.626 34.5583 10
 -1 -8 5 416.945 37.9479 10
 -1 -8 4 679.042 46.6668 10
 -1 -8 4 730.265 127.405 4
 1 -8 -4 650.613 45.6056 10
 -1 -8 3 343.654 82.5364 4
 -1 -8 3 387.581 37.5752 10
 1 -8 -3 347.202 35.2206 10
 1 -8 -2 158.817 27.108 10
 -1 -8 2 228.201 30.8786 10
 -1 -8 2 242.933 74.8715 4
 1 -8 -1 217.547 30.1968 10
 -1 -8 1 212.709 30.7926 10
 1 -8 0 20.1138 21.8814 10
 -1 -8 0 -25.063 20.759 10
 1 -8 1 3225.2 96.9772 10
 -1 -8 -1 3216.75 94.5282 10
 1 -8 2 2628.25 88.7405 10
 1 -8 3 24621.8 648.814 4
 1 -8 3 25173.8 265.421 10
 1 -8 4 103.586 68.4184 4
 1 -8 4 137.833 29.711 10
 1 -8 5 37.545 46.1274 4
 1 -8 5 49.7141 21.923 10
 1 -8 6 50.3722 20.256 10
 1 -8 7 7169.94 136.56 10
 1 -8 8 46.0042 21.5836 10
 1 -8 8 33.9183 18.6656 7
 1 -8 9 1897.8 70.4531 7
 1 -8 9 1904.4 68.4171 10
 1 -8 10 552.727 39.8314 7
 1 -8 11 376.588 33.4689 7
 1 -8 12 73.2443 20.0637 7
 1 -8 13 15.9172 15.805 7
 1 -8 14 138.923 20.8415 7
 1 -8 15 23.3547 13.7076 7
 -1 -9 13 23.0779 13.2381 10
 -1 -9 12 119.486 19.3054 10
 -1 -9 11 176.892 22.2444 10
 -1 -9 10 232.613 27.6543 10
 -1 -9 9 297.407 30.1366 10
 -1 -9 8 -22.5949 20.6076 10
 -1 -9 7 1332 59.3911 10
 -1 -9 6 114.84 27.0435 10
 1 -9 -5 650.284 42.2775 10
 -1 -9 5 689.688 45.47 10
 1 -9 -4 1030.68 53.888 10
 -1 -9 4 1067.15 55.1996 10
 -1 -9 3 1402.39 61.6431 10
 1 -9 -3 1418.03 63.2034 10
 -1 -9 2 260.024 31.0713 10
 1 -9 -2 269.09 32.8805 10
 -1 -9 1 3693.41 98.5595 10
 1 -9 -1 3735.79 100.554 10
 -1 -9 0 95.3621 22.7329 10
 1 -9 0 52.9417 21.9315 10
 1 -9 1 265.953 31.7878 10
 1 -9 2 150.291 26.8474 10
 1 -9 3 264.328 31.7486 10
 1 -9 4 488.134 38.2075 10
 1 -9 5 904.857 50.2514 10
 1 -9 6 1770.85 67.3091 10
 1 -9 7 1060.54 50.1884 10
 1 -9 8 404.855 32.5033 10
 1 -9 9 167.775 22.631 10
 1 -9 10 73.5746 16.3561 10
 1 -9 10 58.2699 15.9369 7
 1 -9 11 269.638 24.2567 7
 1 -9 12 86.2096 16.0481 7
 -1 -10 8 266.278 23.9325 10
 -1 -10 7 164.937 21.4267 10
 -1 -10 6 1404.15 50.4639 10
 -1 -10 5 376.257 29.6532 10
 1 -10 -4 451.39 30.9897 10
 -1 -10 4 453.107 31.9894 10
 -1 -10 3 -24.1258 17.1321 10
 1 -10 -3 -28.1278 16.8088 10
 -1 -10 2 991.89 45.1879 10
 1 -10 -2 1057.98 47.0444 10
 -1 -10 1 46.8788 16.5427 10
 1 -10 -1 64.4419 19.5572 10
 -1 -10 0 88.4316 17.9008 10
 1 -10 0 97.6862 20.4473 10
 1 -10 1 297.251 28.0333 10
 1 -10 2 335.774 29.948 10
 1 -10 3 508.545 35.6275 10
 1 -10 4 -15.9015 16.7559 10
 1 -10 5 -24.1788 16.9604 10
 1 -10 6 13.6572 14.1975 10
 1 -10 7 149.833 18.4252 10
 2 0 -24 264.223 26.1433 14
 2 0 -23 18.0232 19.7449 14
 2 0 -22 451.068 39.6846 14
 2 0 -21 1.9522 21.5076 11
 2 0 -21 -27.9143 22.202 14
 2 0 -20 5964.03 138.462 14
 2 0 -20 6366.04 137.296 11
 -2 0 19 -75.3961 64.7889 2
 2 0 -19 -3.45577 23.4953 14
 2 0 -19 -46.1808 26.4266 11
 2 0 -18 6314.7 140.741 14
 2 0 -18 5950.2 133.175 11
 -2 0 17 -59.0491 57.3775 2
 -2 0 16 18835.6 501.347 2
 -2 0 15 -54.0157 56.8006 2
 -2 0 14 6082.82 261.476 2
 -2 0 13 -37.1614 36.2513 2
 -2 0 12 2324.04 324.189 1
 -2 0 12 2195.08 144.176 2
 -2 0 11 32.1995 94.6165 1
 -2 0 11 -16.8806 33.9659 2
 -2 0 10 134878 977.722 2
 -2 0 10 126703 2117.32 1
 -2 0 9 9.81687 73.8493 1
 -2 0 8 82502.1 1472.81 1
 -2 0 7 28.6053 73.0079 1
 -2 0 6 1111.74 149.834 1
 2 0 -5 56.0283 35.9944 9
 -2 0 5 12.3305 52.2712 1
 -2 0 4 27059.7 613.503 1
 -2 0 3 -9.04183 49.6237 1
 -2 0 3 -21.5672 27.9871 15
 -2 0 2 101843 1074.43 1
 -2 0 2 104399 889.542 15
 -2 0 1 -13.7704 33.6997 15
 -2 0 1 8.72364 42.9139 1
 -2 0 0 320.667 68.9341 15
 -2 0 -1 35.785 46.9642 15
 -2 0 -2 231771 1881.07 15
 -2 0 -3 12.1588 74.6893 17
 -2 0 -4 7864.71 451.624 17
 -2 0 -5 119.255 120.454 17
 -2 0 -6 208110 2653.99 17
 -2 0 -7 162.612 134.885 17
 -2 0 -8 36866.4 1259.15 17
 -2 0 -9 17.2094 26.6174 16
 -2 0 -9 -10.3047 125.489 17
 -2 0 -10 46897.4 545.549 16
 -2 0 -10 48122 1610.99 17
 -2 0 -11 -18.7353 28.3112 16
 2 0 12 20604.5 431.893 2
 2 0 13 -6.05172 33.2038 2
 2 0 14 5376.87 240.79 2
 2 0 15 -15.2889 37.5305 2
 2 0 16 35.411 41.4158 2
 -2 0 -17 -12.0262 18.0395 13
 2 0 17 51.0232 49.6897 2
 -2 0 -17 -5.3168 22.1284 11
 -2 0 -18 974.637 48.0709 13
 -2 0 -18 995.781 60.688 11
 -2 0 -19 -13.8236 24.4484 11
 -2 0 -20 2079.5 81.5587 11
 -2 0 -21 4.67321 21.6768 11
 -2 0 -22 1269.95 54.8125 11
 -2 0 -23 -4.65225 15.618 11
 2 1 -24 53.1134 18.6279 14
 2 -1 -24 33.822 16.3575 14
 2 -1 -23 28.5383 18.0684 14
 2 1 -23 -3.95313 18.499 14
 2 -1 -22 437.45 38.7858 14
 2 1 -22 526.03 42.2199 14
 2 -1 -21 255.452 34.482 11
 2 1 -21 261.374 34.8579 14
 2 -1 -21 216.354 30.2227 14
 2 -1 -20 384.086 38.313 14
 2 1 -20 305.271 38.2797 14
 2 -1 -20 382.7 39.866 11
 2 -1 -19 625.347 47.5529 11
 2 1 -19 682.689 49.933 14
 2 -1 -19 617.79 46.747 14
 -2 -1 19 715.028 113.864 2
 2 -1 -18 1720.58 74.7627 11
 2 1 -18 1863.08 77.4433 14
 2 -1 -18 1710.72 73.1099 14
 -2 -1 18 1653.08 163.168 2
 -2 -1 17 5442.43 286.398 2
 -2 -1 16 529.729 97.5541 2
 -2 -1 15 93.4111 56.0036 2
 -2 1 15 -13.1629 40.4526 2
 -2 1 14 74.8697 31.1975 2
 -2 -1 14 165.739 55.9849 2
 -2 -1 13 453.83 82.0191 2
 -2 1 13 440.474 66.6348 2
 -2 1 12 25583.4 464.055 2
 -2 -1 12 24890.6 1066.9 1
 -2 -1 12 24198.8 489.192 2
 -2 1 11 34.5867 28.9591 2
 2 -1 -11 15.3352 23.9319 5
 -2 -1 11 139.132 93.6045 1
 -2 1 11 -69.697 97.8858 1
 -2 -1 11 -10.5077 34.3771 2
 -2 1 10 17657.7 815.854 1
 -2 -1 10 16224.6 747.536 1
 -2 -1 10 16141.1 358.891 2
 -2 1 10 17022.4 334.124 2
 -2 -1 9 8208.96 238.272 2
 -2 -1 9 7934.84 485.983 1
 -2 1 9 7430.54 491.918 1
 -2 -1 8 21201.8 728.291 1
 -2 1 8 19471.2 744.165 1
 2 -1 -8 21010.9 677.761 9
 -2 1 7 3765.18 310.242 1
 2 -1 -7 3701.23 265.238 9
 -2 -1 7 3687.55 279.201 1
 -2 1 6 -21.9741 67.2157 1
 2 -1 -6 -4.6884 50.7117 9
 -2 -1 6 -2.93905 48.0134 1
 -2 1 5 2793.8 237.83 1
 -2 -1 5 2659.72 198.133 1
 -2 -1 4 50751.7 736.539 1
 -2 1 4 48544.8 917.447 1
 -2 -1 3 246008 1399.55 1
 -2 -1 2 8589.51 367.548 15
 -2 -1 2 8030.77 230.009 1
 -2 -1 1 43410.4 811.842 15
 -2 -1 0 999999 3902.1 15
 -2 -1 0 995849 3029.36 17
 -2 -1 -1 263276 1833.44 17
 -2 -1 -2 92320.8 1236.94 17
 -2 -1 -3 1910.09 202.801 17
 -2 -1 -3 1507.09 178.102 15
 -2 -1 -4 53876.7 1147.7 17
 -2 -1 -4 55847.9 1125.97 15
 -2 -1 -5 -13.2167 62.5498 15
 -2 -1 -5 -66.8161 94.3274 17
 -2 -1 -6 162.386 93.5119 17
 -2 -1 -7 16367.9 784.828 17
 -2 1 -7 15585.3 804.158 17
 -2 -1 -8 11006.5 687.888 17
 -2 1 -8 10298.7 689.048 17
 -2 1 -8 10195.5 243.83 16
 -2 1 -9 26946.1 1173.91 17
 -2 1 -9 26318.6 410.935 16
 -2 -1 -9 26811.6 1134.87 17
 -2 -1 -9 26828.8 445.778 6
 -2 1 -10 2752.88 139.659 16
 2 1 11 31.9126 30.0914 2
 -2 1 -11 79.2792 30.5865 16
 -2 1 -12 22136 421.081 16
 2 -1 12 21673.1 454.515 2
 2 1 12 22163.4 438.729 2
 2 -1 13 2678.78 168.483 2
 2 1 13 2738.96 162.674 2
 2 1 14 237.483 55.4561 2
 2 -1 14 263.602 60.0836 2
 2 -1 15 262.808 60.641 2
 -2 1 -16 1285.5 60.4811 14
 -2 -1 -16 1211.33 62.9382 11
 -2 1 -16 1350.54 55.7004 13
 2 -1 16 1217.74 127.025 2
 -2 -1 -17 478.246 42.705 11
 -2 1 -17 478.58 35.5129 13
 2 -1 17 445.426 79.422 2
 -2 1 -17 507.619 41.6703 14
 -2 -1 -18 1704.95 76.0424 11
 -2 1 -18 1763.65 64.1509 13
 -2 1 -18 1778.56 78.5952 11
 -2 1 -18 1732.92 69.9708 14
 -2 -1 -19 -6.43601 24.0483 11
 -2 1 -19 3.18001 17.7032 14
 -2 1 -19 19.7829 22.862 11
 -2 -1 -20 621.921 46.8629 11
 -2 1 -20 657.241 42.1277 14
 -2 1 -20 595.515 46.6425 11
 -2 1 -21 453.457 34.163 14
 -2 1 -21 496.152 39.6248 11
 -2 -1 -21 452.856 38.3118 11
 -2 1 -22 49.8267 17.763 11
 -2 -1 -22 95.9775 21.6019 11
 -2 1 -23 45.4549 16.2373 11
 -2 -1 -23 23.4213 14.8192 11
 2 2 -24 36.6607 17.2448 14
 2 2 -23 27.6406 20.0472 14
 2 2 -22 387.014 37.3673 14
 2 2 -21 461.965 42.5556 14
 2 2 -20 1.48568 22.6562 14
 2 -2 -19 1266.57 68.2436 11
 2 2 -19 1290.91 65.59 14
 -2 -2 19 1371.61 150.53 2
 -2 -2 18 358.597 79.0821 2
 2 -2 -18 427.575 40.1743 11
 -2 -2 18 458.189 40.8051 7
 2 2 -18 472.789 41.9834 14
 -2 -2 17 1031.39 134.31 2
 -2 -2 16 2732.47 202.77 2
 -2 -2 15 412.228 86.5511 2
 -2 -2 14 -58.7351 53.298 2
 2 -2 -13 40616.9 614.822 5
 -2 -2 13 38842.4 674.698 2
 -2 -2 12 -11.2927 38.4026 2
 2 -2 -12 5.52739 29.362 5
 -2 -2 11 7862.44 278.176 2
 2 -2 -11 8867 267.478 5
 2 -2 -10 1314.98 103.537 5
 -2 2 10 1453.81 240.722 1
 -2 -2 10 1122.82 105.373 2
 -2 2 9 51090.7 1361.33 1
 -2 -2 9 49439.6 623.893 2
 2 -2 -9 52936.2 1294.22 9
 2 -2 -9 50782.4 586.525 5
 -2 2 8 505.335 124.888 1
 2 -2 -8 465.224 128.532 9
 -2 2 7 23171.5 812.846 1
 2 -2 -7 23818.3 781.275 9
 -2 2 6 915.736 161.092 1
 -2 2 5 1386.6 184.989 1
 -2 2 4 18173.4 628.432 1
 -2 2 3 249712 2259.34 1
 -2 2 2 12.4644 56.955 1
 -2 -2 2 19.6611 77.1087 15
 -2 -2 1 79823.9 1358.62 15
 -2 2 1 81030.5 1232.06 1
 -2 -2 0 3518.63 219.869 9
 -2 2 0 3591.77 262.125 1
 -2 -2 0 3640.26 296.617 15
 -2 -2 -1 131341 1453.99 9
 -2 -2 -1 132954 1755.8 15
 -2 -2 -2 6113.28 389.157 15
 -2 -2 -3 24239.4 784.694 15
 -2 -2 -4 213.917 106.561 15
 -2 -2 -5 11463.1 601.126 17
 -2 -2 -5 12584.6 613.158 15
 -2 -2 -6 4525.17 379.226 15
 -2 -2 -6 5215.6 433.206 17
 -2 -2 -7 18980.1 876.337 17
 -2 -2 -7 19817.3 363.981 6
 -2 -2 -7 19342.8 817.038 15
 -2 2 -7 18973.3 331.702 16
 -2 -2 -8 978.999 89.6498 6
 -2 -2 -8 1211 234.371 17
 -2 2 -8 1072.98 86.1438 16
 -2 -2 -9 6640.26 583.063 17
 -2 2 -9 6576.89 212.245 16
 -2 -2 -9 6208.57 230.629 6
 -2 -2 -10 11998.3 337.659 6
 -2 2 -10 12603.1 303.942 16
 -2 -2 -11 2971.24 178.556 6
 2 -2 11 2902.67 166.148 2
 2 -2 12 714.164 89.4104 2
 2 -2 13 400.048 70.7878 2
 2 -2 14 10.0348 43.99 2
 2 -2 15 2094.94 162.474 2
 2 -2 16 281.662 70.8059 2
 -2 -2 -16 340.435 38.2355 11
 -2 2 -16 325.475 30.6747 13
 -2 2 -16 288.068 32.7827 14
 -2 -2 -16 325.231 32.0194 12
 -2 2 -17 99.2196 21.9881 13
 2 -2 17 131.41 51.3157 2
 -2 2 -17 131.404 24.9405 14
 -2 -2 -17 174.832 30.6747 11
 -2 -2 -18 214.37 34.0677 11
 -2 2 -18 214.286 28.7618 14
 -2 2 -18 280.331 30.0468 13
 -2 -2 -19 1871.09 76.4639 11
 -2 2 -19 1920.91 78.5472 11
 -2 2 -19 1870.19 71.8773 14
 -2 -2 -20 4.66259 20.2008 11
 -2 2 -20 12.2811 18.4207 14
 -2 2 -20 0.1632 20.4952 11
 -2 -2 -21 242.578 30.011 11
 -2 2 -21 284.299 30.8571 11
 -2 2 -21 241.805 27.503 14
 -2 -2 -22 39.1349 19.0183 11
 -2 2 -22 48.0608 17.5773 11
 -2 2 -22 50.3387 16.0532 14
 2 3 -23 473.017 33.3358 14
 2 3 -22 256.7 29.6596 14
 2 3 -21 -3.51869 20.2374 14
 2 3 -20 1083.47 58.8898 14
 -2 -3 19 977.931 57.3478 7
 2 3 -19 1008.6 56.6833 14
 -2 -3 18 1369.42 149.188 2
 -2 -3 18 1349.24 66.3137 7
 2 3 -18 1398.6 67.2189 14
 -2 -3 17 2272.17 190.05 2
 -2 -3 17 2279.99 85.5898 7
 2 3 -17 2273.95 82.4295 14
 -2 -3 16 1069.09 134.718 2
 -2 -3 15 8533.89 349.132 2
 2 -3 -14 1155.98 122.345 5
 -2 -3 14 965.778 117.405 2
 -2 -3 13 7627.31 307.722 2
 2 -3 -13 7411.48 292.031 5
 -2 -3 12 -8.75188 38.2243 2
 2 -3 -12 12.8274 38.2659 5
 2 -3 -11 173.514 58.2222 5
 -2 -3 11 57.0724 39.6315 2
 -2 -3 10 714.097 86.8927 2
 2 -3 -10 943.087 97.7209 5
 -2 -3 9 33769.6 537.723 2
 2 -3 -9 34036.1 531.365 5
 -2 -3 8 1167.51 96.8354 2
 -2 3 8 1131.33 211.758 1
 2 -3 -8 971.163 89.3038 5
 -2 3 7 11208.9 610.68 1
 2 -3 -7 10464.3 272.375 5
 2 -3 -6 1259.06 93.3003 5
 -2 3 6 1267.09 198.733 1
 -2 3 5 4612.2 362.134 1
 -2 3 4 12831.5 584.482 1
 -2 3 3 100776 1603.7 1
 -2 3 2 8021.66 438.636 1
 -2 -3 2 7729.8 509.642 15
 -2 3 1 30096.4 843.737 1
 -2 -3 1 30048.6 981.847 15
 -2 -3 0 9342.83 543.16 15
 -2 -3 -1 15593.9 704.521 15
 -2 -3 -1 15802.5 596.661 9
 -2 -3 -2 18574.8 684.282 9
 -2 -3 -2 18281.1 757.573 15
 -2 -3 -3 3209.3 323.238 15
 -2 -3 -3 3047.12 293.456 9
 -2 -3 -4 7338.59 487.352 9
 -2 -3 -4 7161.65 496.927 15
 -2 -3 -5 -45.1741 110.942 15
 -2 -3 -5 6.38148 31.68 6
 -2 3 -5 61.7624 30.7486 16
 -2 -3 -5 104.714 109.857 9
 -2 -3 -6 4325.07 415.774 9
 -2 -3 -6 3938.89 389.472 15
 -2 3 -6 4014.54 152.51 16
 -2 -3 -6 4175.35 178.604 6
 -2 3 -7 1373.96 96.0731 16
 -2 -3 -7 1338.41 236.559 9
 -2 -3 -7 972.133 211.031 15
 -2 -3 -7 1237.01 104.311 6
 -2 -3 -8 7231.05 555.576 15
 -2 -3 -8 7141.78 254.797 6
 -2 3 -8 7179.21 223.328 16
 -2 -3 -9 60.6134 41.2128 6
 2 -3 10 -23.8706 25.4967 2
 -2 -3 -10 -8.32494 36.3596 6
 2 -3 11 434.089 68.7181 2
 -2 -3 -11 429.153 81.682 6
 2 -3 12 217.266 54.2817 2
 -2 -3 -12 240.191 67.3243 6
 2 -3 13 317.499 66.5221 2
 2 -3 14 2362.9 171.679 2
 -2 -3 -15 1157.74 61.1716 11
 -2 -3 -15 1161.79 54.8121 12
 -2 3 -15 1170.02 51.7497 13
 2 -3 15 1041.32 118.631 2
 -2 -3 -16 3395.66 91.6085 12
 -2 3 -16 3130.08 84.9467 13
 -2 -3 -16 3417.73 103.463 11
 -2 3 -16 3351.14 98.2074 14
 -2 -3 -17 3295.42 100.956 11
 -2 3 -17 3189.16 85.3358 13
 -2 3 -17 3430.19 97.9373 14
 -2 -3 -18 119.258 27.2818 11
 -2 3 -18 103.973 24.2702 14
 -2 -3 -19 424.795 38.2066 11
 -2 3 -19 379.17 35.309 14
 -2 3 -19 402.066 37.1844 11
 -2 -3 -20 71.1135 22.9304 11
 -2 3 -20 38.7421 17.8943 11
 -2 3 -20 16.7735 18.8075 14
 -2 3 -21 786.545 40.538 14
 -2 3 -21 913.641 44.0127 11
 -2 3 -22 238.163 22.8487 14
 2 -4 -23 15.1894 14.0614 8
 2 -4 -22 140.413 23.5401 8
 2 4 -22 131.967 21.6645 14
 2 4 -21 12.6668 16.6341 14
 2 -4 -21 -33.1187 23.3568 8
 2 4 -20 49.6488 21.116 14
 2 4 -19 2170.48 77.4487 14
 -2 -4 19 2055.5 79.0767 7
 -2 -4 18 911.298 55.6138 7
 2 4 -18 982.335 54.2262 14
 -2 -4 17 -31.8434 47.124 2
 -2 -4 17 -24.4514 24.2981 7
 2 4 -17 23.8828 17.4469 14
 2 -4 -16 4231.5 250.877 5
 -2 -4 16 4345.19 252.271 2
 -2 -4 16 4505.61 119.451 7
 -2 -4 15 6411.21 301.547 2
 2 -4 -15 6063.78 297.553 5
 2 -4 -14 654.778 105.272 5
 -2 -4 14 687.529 100.642 2
 2 -4 -13 2175.58 178.251 5
 2 -4 -12 -42.5222 53.1236 5
 2 -4 -11 7256.23 293.158 5
 2 -4 -10 10202.2 337.407 5
 2 -4 -9 1742.63 138.635 5
 2 -4 -8 769.261 91.7852 5
 2 -4 -7 18694.1 407.267 5
 -2 4 7 19370 875.968 1
 2 -4 -6 3676.4 174.997 5
 -2 4 6 3387.31 359.721 1
 -2 -4 6 3605.23 189.618 4
 -2 4 5 2147.43 276.226 1
 -2 -4 5 2190.94 146.585 4
 2 -4 -5 2071.82 125.725 5
 -2 -4 4 3248.88 173.691 6
 -2 -4 4 3231.6 173.563 4
 2 -4 -4 3323.67 152.416 5
 -2 4 4 3313.32 333.439 1
 -2 -4 3 147091 1130.62 6
 -2 4 3 150367 2149.05 1
 -2 -4 3 148589 1132.97 4
 -2 -4 2 58.4995 45.9677 4
 -2 -4 2 28.5736 41.4559 6
 -2 -4 2 -7.54484 82.1071 15
 -2 -4 1 4465.07 191.061 6
 -2 -4 1 4635.04 200.003 4
 -2 -4 0 20078.7 400.73 6
 -2 -4 0 20643.2 936.243 15
 -2 -4 0 19408.3 409.366 4
 -2 -4 -1 20974.4 411.209 6
 -2 -4 -1 20257.2 921.172 15
 -2 -4 -2 6019.03 501.545 15
 -2 -4 -2 5438.58 210.257 6
 -2 -4 -3 2588.7 147.98 6
 -2 -4 -3 2149.56 304.782 15
 -2 -4 -4 11155.4 662.81 9
 -2 -4 -4 10737.3 305.454 6
 -2 -4 -4 11641.1 706.393 15
 -2 -4 -5 2180.79 314.414 15
 -2 -4 -5 2008.53 137.133 6
 -2 -4 -5 1794.72 283.96 9
 -2 -4 -6 45013.5 652.906 6
 -2 -4 -6 45573 1435.62 15
 -2 -4 -7 80.9276 48.0341 6
 -2 -4 -8 5173.97 237.85 6
 -2 -4 -9 1628.51 141.844 6
 -2 -4 -10 909.529 110.987 6
 -2 -4 -11 2328.4 181.397 6
 -2 -4 -12 345.492 84.1809 6
 2 -4 13 62.3113 42.4458 2
 -2 4 -14 3892.74 89.9211 13
 -2 -4 -14 3795.17 96.073 12
 2 -4 14 3609.8 97.0979 7
 2 -4 14 3657.46 211.449 2
 -2 -4 -15 171.254 25.9903 12
 2 -4 15 161.753 55.7703 2
 -2 4 -15 155.477 22.254 13
 -2 4 -16 590.775 44.0553 14
 -2 4 -17 90.9635 24.2744 14
 -2 4 -18 1387.3 61.643 14
 -2 4 -19 529.991 39.5758 14
 -2 4 -19 486.373 36.9283 11
 -2 4 -20 405.155 31.5502 14
 -2 4 -21 57.2317 15.7663 14
 2 -5 -22 252.143 23.5322 8
 2 -5 -21 -6.97137 16.3978 8
 2 -5 -20 21.9517 17.9949 8
 2 -5 -19 33.6463 21.9919 8
 -2 -5 19 4.76677 21.056 7
 2 -5 -18 77.9105 25.2849 8
 -2 -5 18 27.1143 22.4768 7
 2 -5 -17 -12.496 21.5106 8
 -2 -5 17 16.2968 22.4409 7
 2 -5 -16 52.1495 24.6756 8
 -2 -5 16 52.597 21.5085 7
 -2 -5 15 2785.34 94.4619 7
 2 -5 -15 2515.92 202.94 5
 -2 -5 14 186.846 27.1112 10
 2 -5 -14 253.386 78.4594 5
 -2 -5 14 201.626 30.7236 7
 2 -5 -13 2477.66 198.053 5
 2 -5 -12 1415.52 153.653 5
 -2 -5 12 1419.33 152.849 4
 2 -5 -11 3494.91 229.893 5
 -2 -5 11 3657.37 238.288 4
 -2 -5 10 1403.64 148.399 4
 2 -5 -10 1430.13 144.483 5
 -2 -5 9 424.218 91.1371 4
 2 -5 -9 471.999 83.7776 5
 -2 -5 8 106.169 54.3124 4
 2 -5 -8 220.707 70.9482 5
 -2 -5 8 59.7178 48.4489 6
 -2 -5 7 3370.15 213.483 4
 -2 -5 7 3596.44 215.815 6
 2 -5 -7 3690.84 202.952 5
 -2 -5 6 3956.99 220.478 6
 2 -5 -6 3852.37 201.083 5
 -2 -5 6 4186.11 235.271 4
 2 -5 -5 21981.2 456.954 5
 -2 -5 5 22001.2 504.353 6
 -2 -5 5 21183.1 510.596 4
 -2 -5 4 12710.4 375.501 6
 -2 -5 4 12615.7 387.764 4
 2 -5 -4 12750.1 333.239 5
 -2 -5 3 1559.16 133.758 6
 -2 -5 3 1606.02 141.831 4
 -2 -5 2 34.9643 36.1342 4
 -2 -5 2 63.4002 33.5151 6
 -2 -5 1 15605.6 400.951 6
 -2 -5 1 15753.9 420.552 4
 -2 -5 0 19267.8 443.063 6
 -2 -5 0 18936.1 461.695 4
 -2 -5 -1 488.957 79.7375 6
 -2 -5 -2 3422.8 189.776 6
 -2 -5 -3 9469.66 315.32 6
 -2 -5 -4 354.915 72.3013 6
 -2 -5 -5 10903.3 348.432 6
 -2 -5 -6 37.492 48.2838 6
 -2 -5 -7 3415.09 211.922 6
 -2 -5 -8 852.291 111.998 6
 -2 -5 -9 1107.15 131.232 6
 -2 -5 -10 4634.68 262.076 6
 -2 -5 -11 229.374 74.2463 6
 2 -5 12 2971.2 89.5072 7
 -2 -5 -12 2800.45 80.5682 12
 -2 -5 -13 4030.42 96.976 12
 2 -5 13 4101.48 105.916 7
 2 -5 14 1395.35 63.4782 7
 -2 -5 -14 1531.69 61.3676 12
 2 -5 15 27.822 18.7163 7
 2 -5 16 927.415 49.8801 7
 -2 5 -16 994.822 51.816 14
 -2 5 -17 13.9653 18.4503 14
 2 -5 17 4.96106 15.8958 7
 -2 5 -18 196.13 26.9642 14
 -2 5 -19 138.61 22.1894 14
 -2 5 -20 -23.6613 15.5509 14
 2 -6 -20 127.397 19.7475 8
 -2 -6 19 954.713 47.6975 7
 2 -6 -19 891.268 45.5128 8
 2 -6 -18 158.258 25.8716 8
 -2 -6 18 176.775 27.5988 7
 -2 -6 17 55.8149 23.746 7
 2 -6 -17 79.5185 22.4802 8
 -2 -6 16 -9.40661 22.1264 7
 2 -6 -16 1.15684 18.9314 8
 2 -6 -15 3138.12 96.3996 8
 -2 -6 15 3300.83 89.9908 10
 -2 -6 15 3244.96 99.6755 7
 -2 -6 14 257.605 29.9645 10
 2 -6 -14 240.862 31.2944 8
 -2 -6 14 274.646 34.2284 7
 -2 -6 13 12.6097 17.5011 10
 2 -6 -13 15.334 18.0249 8
 -2 -6 13 26.7507 18.9508 7
 -2 -6 12 -0.53947 21.4322 10
 2 -6 -12 14.4966 48.5833 5
 2 -6 -12 -17.3832 20.9884 8
 -2 -6 12 -10.8976 18.1205 7
 -2 -6 12 -32.7657 57.4999 4
 -2 -6 11 3655 255.591 4
 -2 -6 11 3891.06 102.538 10
 2 -6 -11 3741.38 245.411 5
 2 -6 -10 -40.9318 58.5752 5
 -2 -6 10 48.768 48.1188 4
 2 -6 -9 307.471 77.8075 5
 -2 -6 9 402.238 101.687 4
 -2 -6 8 560.71 96.0665 6
 2 -6 -8 592.389 101.222 5
 -2 -6 8 716.589 121.541 4
 -2 -6 7 1727.57 158.45 6
 -2 -6 7 1625.49 169.371 4
 2 -6 -7 1712.61 151.219 5
 2 -6 -6 1762.08 149.891 5
 -2 -6 6 1999.66 188.159 4
 -2 -6 6 2151.49 175.633 6
 2 -6 -5 1333.34 129.017 5
 -2 -6 5 1311.51 137.277 6
 -2 -6 5 1266.55 145.839 4
 -2 -6 4 6917.18 304.181 6
 -2 -6 4 7211.46 330.374 4
 -2 -6 3 4210.13 235.584 6
 -2 -6 3 4440.78 258.37 4
 -2 -6 2 5142.13 256.478 6
 -2 -6 2 4829.67 266.847 4
 -2 -6 1 1393.05 134.867 6
 -2 -6 1 1461.94 151.799 4
 -2 -6 0 2911.52 193.988 6
 -2 -6 -1 825.665 105.539 6
 2 -6 2 563.589 91.4072 4
 -2 -6 -2 614.18 95.4703 6
 -2 -6 -3 13127 409.718 6
 -2 -6 -4 4392.76 241.468 6
 -2 -6 -5 4670.12 251.956 6
 -2 -6 -6 2706.79 200.341 6
 -2 -6 -7 579.215 101.949 6
 -2 -6 -8 774.168 117.193 6
 -2 -6 -9 4311.52 260.113 6
 -2 -6 -10 1834.16 176.386 6
 2 -6 10 1862.33 72.9278 7
 -2 -6 -11 923.935 132.895 6
 2 -6 11 1060.84 56.291 7
 -2 -6 -12 17.8339 50.6437 6
 2 -6 12 21.1235 21.5658 7
 2 -6 13 144.128 26.9669 7
 2 -6 14 1045.3 54.8066 7
 2 -6 15 230.789 29.094 7
 -2 6 -15 185.195 26.9584 14
 -2 6 -16 8.22358 17.0789 14
 2 -6 16 14.6377 17.8366 7
 2 -6 17 353.847 29.4755 7
 -2 6 -17 303.499 27.77 14
 2 -6 18 -23.1366 15.0322 7
 -2 6 -18 3.14174 13.9432 14
 -2 -7 18 72.8082 17.3614 7
 2 -7 -18 42.7766 14.8975 8
 2 -7 -17 136.847 20.2548 8
 -2 -7 17 136.024 22.4123 7
 -2 -7 16 169.396 22.9901 10
 -2 -7 16 148.143 25.4449 7
 2 -7 -16 113.221 21.5702 8
 2 -7 -15 697.215 43.1108 8
 -2 -7 15 662.627 40.5756 10
 -2 -7 15 678.835 44.4864 7
 2 -7 -14 -19.7949 18.4137 8
 -2 -7 14 -14.5642 18.6892 10
 -2 -7 14 13.1489 17.7377 7
 -2 -7 13 754.356 46.9551 10
 -2 -7 13 742.455 47.3948 7
 2 -7 -13 717.712 45.5949 8
 -2 -7 12 534.722 41.107 10
 -2 -7 12 610.406 43.503 7
 -2 -7 11 1163.54 59.0236 10
 -2 -7 10 3564.07 100.669 10
 -2 -7 10 3406.84 254.171 4
 -2 -7 9 634.198 46.0491 10
 -2 -7 9 687.865 120.311 4
 -2 -7 8 427.759 104.677 4
 -2 -7 8 527.347 43.469 10
 -2 -7 7 10677.6 172.818 10
 -2 -7 7 10303.1 439.169 4
 -2 -7 6 -73.4948 81.3413 4
 -2 -7 5 405.019 95.3129 4
 -2 -7 4 520.583 107.054 4
 -2 -7 3 1599.57 151.555 6
 -2 -7 3 1708.73 181.576 4
 -2 -7 2 112.946 66.1266 4
 -2 -7 2 105.972 46.4639 6
 -2 -7 1 7785.05 334.264 6
 -2 -7 0 12377.7 421.552 6
 -2 -7 -1 8056.59 341.798 6
 -2 -7 -2 380.905 80.3876 6
 -2 -7 -3 23.7873 46.0564 6
 -2 -7 -4 268.138 78.2459 6
 2 -7 4 104.204 52.3754 4
 2 -7 5 4849.24 286.054 4
 -2 -7 -5 4911.97 274.681 6
 -2 -7 -6 -11.1776 44.401 6
 2 -7 6 -27.2114 19.3571 10
 2 -7 6 25.4198 17.2627 7
 2 -7 6 -46.7094 60.7417 4
 -2 -7 -7 3829.47 248.439 6
 2 -7 7 3772.49 100.959 7
 2 -7 7 3488.78 246.806 4
 -2 -7 -8 1109.65 141.739 6
 2 -7 8 1071.17 55.9577 7
 2 -7 9 1255.09 60.7461 7
 -2 -7 -9 1365.52 154.326 6
 2 -7 10 507.669 40.3563 7
 2 -7 11 381.235 35.9744 7
 2 -7 12 2136.89 75.5039 7
 2 -7 13 3638.92 95.5611 7
 2 -7 14 768.37 45.8727 7
 2 -7 15 2491.66 72.0155 7
 2 -7 16 559.185 33.9418 7
 -2 -8 16 53.8225 14.3663 7
 -2 -8 15 772.98 37.2014 10
 -2 -8 15 680.364 36.5865 7
 -2 -8 14 82.9089 18.6495 10
 -2 -8 13 11.5857 16.5632 10
 -2 -8 12 589.818 40.0144 10
 -2 -8 11 283.533 31.429 10
 -2 -8 10 1194.52 59.1867 10
 -2 -8 9 710.966 47.7098 10
 -2 -8 8 164.408 30.73 10
 2 -8 -8 156.027 27.3173 10
 -2 -8 7 -2.68689 19.0113 10
 2 -8 -7 11.6466 18.7643 10
 -2 -8 6 1390.43 64.4571 10
 2 -8 -6 1221.84 61.4164 10
 -2 -8 5 1371.7 64.3889 10
 2 -8 -5 1347.48 64.606 10
 -2 -8 5 1280.02 162.336 4
 -2 -8 4 1.01351 18.9017 10
 2 -8 -4 46.1695 22.7598 10
 -2 -8 3 2321.53 81.9951 10
 2 -8 -3 2126.98 80.3484 10
 2 -8 -2 216.543 31.4483 10
 -2 -8 2 251.144 31.7369 10
 2 -8 -1 1064.96 57.9837 10
 2 -8 0 62.2596 21.3912 10
 2 -8 1 167.341 28.364 10
 2 -8 2 192.402 29.2023 10
 -2 -8 -2 144.087 60.0575 6
 2 -8 3 1762.82 71.0414 10
 -2 -8 -3 1567.8 159.062 6
 2 -8 4 1112.15 57.4952 10
 2 -8 5 949.815 50.778 7
 2 -8 5 911.69 51.2752 10
 2 -8 6 289.489 30.8904 10
 2 -8 6 269.152 29.8634 7
 2 -8 7 22.1076 18.8006 10
 2 -8 7 -22.8836 19.9771 7
 2 -8 8 284.722 31.7582 7
 2 -8 9 708.801 44.9758 7
 2 -8 10 19.4118 19.8689 7
 2 -8 11 178.34 25.2057 7
 2 -8 12 14.9738 16.6735 7
 2 -8 13 56.9452 17.5124 7
 2 -8 14 32.6078 15.6532 7
 -2 -9 13 25.3189 13.8555 10
 -2 -9 12 252.354 24.0259 10
 -2 -9 11 160.084 21.8527 10
 -2 -9 10 2146.2 67.1916 10
 -2 -9 9 350.652 33.1293 10
 -2 -9 8 291.525 31.7686 10
 2 -9 -7 46.7497 18.9433 10
 -2 -9 7 96.866 23.8369 10
 -2 -9 6 654.184 43.4678 10
 2 -9 -6 661.164 42.7239 10
 2 -9 -5 52.9441 20.9148 10
 -2 -9 5 56.5125 21.8605 10
 -2 -9 4 864.652 48.4858 10
 2 -9 -4 992.771 53.1836 10
 2 -9 -3 73.0899 24.3963 10
 -2 -9 3 55.2125 19.9151 10
 2 -9 -2 104.838 24.2222 10
 -2 -9 2 107.531 23.2638 10
 2 -9 -1 152.832 27.7647 10
 2 -9 0 2251.43 78.2597 10
 2 -9 1 -3.85634 20.4032 10
 2 -9 2 199.843 27.9378 10
 2 -9 3 -9.52016 22.3922 10
 2 -9 4 22.3794 18.7455 10
 2 -9 5 662.555 42.4243 10
 2 -9 6 1.53083 16.9576 10
 2 -9 7 1566.04 55.9485 10
 2 -9 8 250.599 25.7459 7
 2 -9 9 66.0636 17.0839 7
 2 -9 10 639.871 34.3814 7
 2 -9 11 508.668 29.6375 7
 -2 -10 8 -1.64617 13.3273 10
 -2 -10 7 21.288 14.9801 10
 2 -10 -6 1439.82 49.0862 10
 -2 -10 6 1555.75 51.9673 10
 -2 -10 5 90.4869 18.5807 10
 2 -10 -5 45.8908 14.0857 10
 -2 -10 4 16.9227 14.0733 10
 2 -10 -4 -5.21692 15.1882 10
 2 -10 -3 9.06139 14.8214 10
 -2 -10 3 4.42742 14.4111 10
 2 -10 -2 486.18 33.7356 10
 2 -10 -1 248.479 26.4868 10
 2 -10 0 79.194 18.7065 10
 2 -10 1 -14.6981 17.8074 10
 2 -10 2 76.3226 19.3784 10
 2 -10 3 13.5969 16.5626 10
 2 -10 4 756.519 37.1643 10
 2 -10 5 -5.99876 13.1768 10
 2 -10 6 -9.1562 13.6743 10
 3 0 -24 -27.5463 19.2986 14
 3 0 -23 381.44 34.6567 14
 3 0 -22 -10.2326 22.3956 14
 3 0 -21 -18.9576 22.3731 14
 3 0 -20 14.9214 23.2988 14
 -3 0 19 78.8778 53.4897 2
 3 0 -19 74.1587 27.2566 14
 -3 0 18 73.9594 53.3981 2
 3 0 -18 3.09596 23.6847 14
 -3 0 17 4718.98 268.514 2
 -3 0 16 -12.4409 45.7568 2
 -3 0 15 1337.53 135.178 2
 -3 0 14 14.0175 39.4457 2
 -3 0 13 6090.86 260.146 2
 -3 0 12 -27.3684 37.895 2
 -3 0 11 5316.33 477.264 1
 -3 0 11 5469.18 220.982 2
 -3 0 10 50.6793 81.3675 1
 -3 0 10 -3.03042 32.5755 2
 -3 0 9 699.909 152.14 1
 -3 0 9 861.859 82.9418 2
 -3 0 8 57.6023 74.359 1
 -3 0 7 906.006 157.976 1
 -3 0 6 1.66498 69.6817 1
 -3 0 5 4004.38 281.712 1
 -3 0 4 158.717 82.89 1
 -3 0 4 14.9458 35.2575 15
 -3 0 3 13637.5 480.465 1
 -3 0 3 14177.3 402.176 15
 -3 0 2 -16.8727 47.4495 1
 -3 0 2 38.9737 46.4658 15
 -3 0 1 176602 1585.9 15
 -3 0 0 20.014 48.8897 15
 -3 0 -1 24429.4 670.922 15
 -3 0 -2 58.7574 92.7589 17
 -3 0 -2 17.312 70.1221 15
 -3 0 -3 5434.33 391.712 17
 -3 0 -4 113.068 91.0549 17
 -3 0 -5 39214.2 1192.18 17
 -3 0 -6 37.5813 106.24 17
 -3 0 -7 29490.5 410.411 16
 -3 0 -7 28762.7 1155.18 17
 -3 0 -8 -213.451 129.072 17
 -3 0 -8 59.1044 36.7564 16
 -3 0 -9 7717.43 233.313 16
 -3 0 -10 5.91451 30.3156 16
 -3 0 -11 150.587 41.0195 16
 3 0 13 20036.3 464.033 2
 3 0 14 25.3676 43.6861 2
 3 0 15 812.918 102.974 2
 3 0 16 -43.7899 53.247 2
 -3 0 -16 -10.8188 14.0171 13
 -3 0 -17 9.29143 21.1091 11
 -3 0 -17 28.5372 14.9511 13
 -3 0 -18 15.2764 15.6923 13
 -3 0 -18 0.87459 23.8908 11
 -3 0 -19 31.702 22.8055 11
 -3 0 -19 -5.78943 15.3946 13
 -3 0 -20 -26.9061 23.2566 11
 -3 0 -21 -0.27205 18.2031 11
 -3 0 -22 -1.05307 14.7072 11
 3 1 -24 142.468 22.4767 14
 3 -1 -24 183.276 23.6549 14
 3 -1 -23 57.9673 20.2056 14
 3 1 -23 50.5784 21.7887 14
 3 -1 -22 716.206 47.2928 14
 3 1 -22 755.072 49.9561 14
 3 -1 -21 223.057 31.1271 14
 3 1 -21 237.917 34.3272 14
 3 -1 -20 -1.14277 21.8938 14
 3 1 -20 -0.46559 23.1136 14
 3 -1 -19 2986.13 98.4253 14
 3 -1 -19 2973.7 96.9939 11
 3 1 -19 2987.39 100.452 14
 -3 -1 19 3098.88 229.105 2
 -3 -1 18 295.149 80.7566 2
 3 -1 -18 367.121 37.4786 11
 3 -1 -18 433.33 40.676 14
 3 1 -18 423.863 41.6414 14
 -3 -1 17 5529.13 299.959 2
 -3 -1 16 359.797 85.8151 2
 -3 1 16 299.288 71.5507 2
 -3 -1 15 443.806 90.5736 2
 -3 1 15 434.483 79.9156 2
 -3 -1 14 10250.6 367.904 2
 -3 1 14 10802 347.468 2
 -3 1 13 4006.67 201.276 2
 -3 -1 13 3761.99 213.1 2
 -3 -1 12 1021.1 111.331 2
 -3 1 12 1247.05 112.024 2
 -3 1 11 950.979 89.5829 2
 -3 -1 11 945.99 100.492 2
 -3 1 10 26.0825 25.3008 2
 -3 1 10 107.047 92.1289 1
 -3 -1 10 -1.94725 32.7501 2
 -3 -1 9 29.3319 30.6083 2
 -3 1 9 -55.7062 86.354 1
 -3 1 9 57.0261 27.4789 2
 -3 1 8 7152.19 479.067 1
 -3 1 7 58434.5 1297.12 1
 -3 -1 6 8045.32 389.979 1
 -3 1 6 8263.67 468.149 1
 -3 -1 5 4934.94 329.076 15
 -3 1 5 4872.66 343.19 1
 -3 -1 5 4528.74 276.761 1
 -3 -1 4 10736.2 468.996 15
 -3 -1 4 11766 406.083 1
 -3 1 4 11350.9 505.849 1
 -3 -1 3 68478.7 1163.44 15
 -3 1 3 70600.7 1229.46 1
 -3 -1 3 70567.6 929.727 1
 -3 1 2 14566.8 546.218 1
 -3 -1 2 16552.7 563.569 15
 -3 1 1 120317 1558.1 1
 -3 -1 1 116161 1535.05 15
 -3 -1 0 102816 1160.5 17
 -3 -1 0 103329 1479.37 15
 -3 -1 -1 10552.5 429.244 17
 -3 -1 -1 11325.8 511.012 15
 -3 -1 -2 29716.1 798.903 17
 -3 -1 -2 30822.6 870.495 15
 -3 -1 -3 93643.6 1550.89 17
 -3 -1 -3 93813.6 1575.62 15
 -3 -1 -4 550.572 140.756 15
 -3 -1 -4 350.853 117.745 17
 -3 -1 -5 206.36 97.4656 15
 -3 -1 -5 43.0284 71.4319 17
 -3 1 -6 2918.66 128.8 16
 -3 -1 -6 2788.67 330.602 17
 -3 1 -7 10085.2 704.896 17
 -3 1 -7 10204.9 252.249 16
 -3 -1 -7 10409.6 689.461 17
 -3 -1 -7 10092.2 234.712 16
 -3 -1 -8 19688.4 992.794 17
 -3 1 -8 18281.5 1003.7 17
 -3 1 -8 18637.4 358.639 16
 -3 1 -9 179.111 44.6315 16
 -3 1 -10 22000.2 421.641 16
 -3 1 -11 3054.71 164.95 16
 -3 1 -12 339.444 63.5771 16
 -3 1 -13 8941.45 293.168 16
 3 1 13 9601.67 314.825 2
 3 -1 13 8984.15 321.35 2
 3 -1 14 8443.45 316.527 2
 -3 -1 -15 14920.2 179.98 12
 -3 -1 -15 14700 213.049 11
 3 -1 15 14964.7 426.714 2
 -3 1 -15 15081.8 179.867 13
 -3 -1 -16 7093.18 125.476 12
 -3 -1 -16 6827.35 148.223 11
 3 -1 16 6651.45 292.736 2
 -3 1 -16 6845 124.307 13
 -3 -1 -17 717.336 52.2913 11
 -3 1 -17 644.918 40.6346 13
 -3 -1 -18 -20.8447 22.3409 11
 -3 1 -18 -9.95164 23.1484 11
 -3 1 -18 5.06374 16.8335 13
 -3 1 -19 920.044 56.1197 11
 -3 -1 -19 934.272 53.6514 11
 -3 1 -19 906.219 44.6764 13
 -3 1 -20 490.737 40.1762 11
 -3 -1 -20 430.796 36.9374 11
 -3 -1 -21 17.7638 16.5478 11
 -3 1 -21 30.3212 18.4645 11
 -3 -1 -22 506.506 31.4789 11
 -3 1 -22 516.94 32.3918 11
 3 -2 -24 76.502 16.4614 8
 3 2 -24 95.4282 20.0368 14
 3 -2 -23 -0.61707 14.4055 14
 3 2 -23 -17.8885 19.891 14
 3 -2 -22 94.5025 22.3622 14
 3 2 -22 93.2983 25.6815 14
 3 -2 -21 607.396 44.777 14
 3 2 -21 679.764 48.3952 14
 3 -2 -20 28.3543 21.2568 14
 3 2 -20 24.5877 22.1924 14
 -3 -2 19 314.147 77.0766 2
 3 -2 -19 310.316 35.626 14
 3 2 -19 336.444 38.0282 14
 3 2 -18 1008.08 58.4067 14
 3 -2 -18 960.914 57.6596 14
 -3 -2 18 1082.65 138.271 2
 -3 -2 17 461.652 99.6697 2
 -3 -2 16 796.666 122.324 2
 -3 -2 15 6.13535 58.526 2
 -3 -2 14 1323.12 137.268 2
 3 -2 -14 1561.44 129.969 5
 3 -2 -13 -31.8065 42.4151 5
 -3 -2 13 59.3999 51.3472 2
 3 -2 -12 7143.89 260.072 5
 -3 -2 12 7088.98 289.835 2
 -3 -2 11 8073.25 297.514 2
 -3 -2 10 1312.76 116.551 2
 -3 2 10 1327.18 248.16 1
 -3 -2 9 2187.31 141.522 2
 -3 2 9 2134.63 299.042 1
 -3 -2 8 24921.5 435.122 2
 -3 2 8 23964.2 934.088 1
 -3 2 7 21456.4 844.945 1
 -3 2 6 3927.9 351.561 1
 -3 -2 5 9338.75 544.215 15
 -3 2 5 9070.71 512.733 1
 -3 2 4 7544.46 452.222 1
 -3 -2 4 7674.65 483.492 15
 -3 -2 3 39795.8 1073.19 15
 -3 2 3 39018.2 1009.81 1
 -3 2 2 38236.5 984.433 1
 -3 -2 2 38702.3 1056.33 15
 -3 2 1 47946.9 1093.5 1
 -3 -2 1 46030.7 1133.57 15
 -3 -2 0 65363 1357.59 15
 -3 -2 -1 39789 1077.78 15
 -3 -2 -2 107.611 92.2267 15
 -3 -2 -3 33.4901 68.4302 15
 -3 -2 -4 21006.3 858.29 15
 -3 -2 -4 22004.8 837.215 17
 -3 -2 -5 12724.4 690.275 15
 -3 -2 -5 12503.2 679.749 17
 -3 2 -5 12890.3 269.748 16
 -3 -2 -6 9821.49 258.954 6
 -3 -2 -6 10460.8 659.276 17
 -3 2 -6 9866.44 249.585 16
 -3 -2 -6 9942.74 632.681 15
 -3 -2 -7 309.416 55.3138 6
 -3 2 -7 151.182 42.3579 16
 -3 -2 -7 28.6616 67.5103 17
 -3 -2 -7 388.232 183.66 15
 -3 2 -8 6113.54 214.715 16
 -3 -2 -8 6630.7 235.421 6
 -3 -2 -9 56.5275 39.6478 6
 -3 2 -9 120.709 40.9785 16
 -3 2 -10 1330.95 111.72 16
 -3 -2 -10 1130.41 111.403 6
 -3 2 -11 5212.8 217.305 16
 3 -2 12 3589.71 198.64 2
 -3 2 -12 3534.75 188.064 16
 3 -2 13 1022.81 111.323 2
 3 -2 14 1382.31 133.522 2
 -3 -2 -15 252.172 29.13 12
 -3 -2 -15 207.305 28.3237 11
 -3 2 -15 262.866 27.0233 13
 3 -2 16 141.333 53.0327 2
 -3 -2 -16 102.098 23.3276 12
 -3 -2 -16 68.2167 24.9627 11
 -3 2 -16 74.0857 23.1334 14
 -3 2 -16 89.7919 21.4461 13
 -3 -2 -17 368.676 37.7346 11
 -3 2 -17 361.234 35.1125 14
 -3 2 -17 360.501 31.8414 13
 -3 -2 -18 310.317 35.221 11
 -3 2 -18 299.781 32.417 14
 -3 2 -18 290.619 29.0569 13
 -3 -2 -19 362.404 35.4649 11
 -3 2 -19 360.019 37.9243 11
 -3 2 -19 352.66 33.2203 14
 -3 -2 -20 119.598 23.1922 11
 -3 2 -20 135.628 25.091 11
 -3 2 -20 145.923 22.6062 14
 -3 -2 -21 21.0007 15.1189 11
 -3 2 -21 28.2009 14.1246 14
 3 -3 -23 326.807 28.9467 8
 3 3 -23 309.622 27.1911 14
 3 3 -22 672.034 42.073 14
 3 -3 -22 681.23 43.9426 8
 3 3 -21 230.901 31.314 14
 3 3 -20 733.555 48.2702 14
 3 3 -19 21.0857 20.1163 14
 -3 -3 18 732.971 117.932 2
 3 3 -18 680.879 48.1139 14
 -3 -3 17 69.8588 25.2374 7
 3 3 -17 28.9512 20.1733 14
 -3 -3 16 0.84643 51.3765 2
 3 -3 -15 99.4566 42.3703 5
 -3 -3 15 85.4899 61.788 2
 -3 -3 14 1793.39 164.249 2
 3 -3 -14 1861.46 155.157 5
 -3 -3 13 200.827 67.2814 2
 3 -3 -13 210.201 67.5909 5
 3 -3 -12 2176.76 159.207 5
 -3 -3 12 2255.77 170.735 2
 -3 -3 11 6456.7 274.765 2
 3 -3 -11 6316.36 253.729 5
 -3 -3 10 15.9302 40.6767 2
 3 -3 -10 34.9741 35.3056 5
 3 -3 -9 29923.9 511.288 5
 -3 -3 9 29813.2 525.85 2
 -3 3 8 10282.1 653.661 1
 3 -3 -8 9334.98 277.167 5
 -3 -3 8 10074.7 289.018 2
 -3 3 7 2.0606 72.5981 1
 -3 -3 7 30.683 27.7349 2
 -3 3 6 19026.9 834.501 1
 -3 3 5 71296.2 1569.3 1
 -3 -3 5 77102.1 1820.3 15
 -3 3 4 8075.79 517.261 1
 -3 -3 4 8300.72 583.828 15
 -3 3 3 21886.6 836.683 1
 -3 -3 3 23950.5 970.665 15
 -3 -3 2 23043.2 939.208 15
 -3 3 2 22515.9 840.051 1
 -3 -3 1 1306.52 231.594 15
 -3 3 1 1360.57 211.505 1
 -3 -3 0 6793.36 505.373 15
 -3 -3 -1 52999.7 1415.47 15
 -3 -3 -2 22345.3 398.488 6
 -3 -3 -2 20792.8 909.386 15
 -3 -3 -3 22060.1 400.52 6
 -3 -3 -3 19809.8 900.288 15
 -3 -3 -3 20810.6 811.366 9
 -3 -3 -4 19184.1 381.836 6
 -3 -3 -4 18601.6 889.81 15
 -3 -3 -4 18257.4 804.823 9
 -3 3 -4 18584.3 328.342 16
 -3 -3 -5 17303.1 372.646 6
 -3 -3 -5 16600 814.151 9
 -3 -3 -5 16878.2 861.75 15
 -3 3 -5 17259.2 330.629 16
 -3 -3 -6 8780.4 273.593 6
 -3 -3 -6 8192.11 599.832 9
 -3 -3 -6 9392.12 658.163 15
 -3 3 -6 8434.31 242.09 16
 -3 -3 -7 2487.18 154.08 6
 -3 3 -7 2434.69 136.263 16
 -3 -3 -8 6266.54 249.544 6
 -3 3 -8 6096.41 222.33 16
 -3 -3 -9 12688.1 370.854 6
 -3 3 -9 13196.1 337.706 16
 -3 -3 -10 8471.83 316.764 6
 -3 3 -10 8423.84 279.504 16
 3 -3 11 9139.73 307.673 2
 -3 -3 -11 9769.35 351.032 6
 3 -3 12 299.41 63.0772 2
 3 -3 13 158.823 54.7189 2
 -3 -3 -14 2214.57 74.3504 12
 -3 3 -14 2348.71 70.9037 13
 3 -3 14 2134.72 163.32 2
 -3 -3 -15 1625.96 64.1834 12
 -3 3 -15 1414.64 57.182 13
 3 -3 15 1504.7 142.542 2
 -3 -3 -16 4440.31 104.32 12
 -3 3 -16 4414.11 98.3425 13
 -3 3 -17 4978.83 114.674 14
 -3 3 -17 4900.17 103.312 13
 -3 3 -18 35.5434 20.0903 14
 -3 3 -19 287.276 32.9317 11
 -3 3 -19 201.42 26.6773 14
 -3 3 -20 66.3671 20.5801 11
 -3 3 -20 22.3097 15.4808 14
 -3 3 -21 171.378 21.3113 11
 -3 3 -21 157.885 18.9892 14
 3 -4 -23 371.478 27.6504 8
 3 -4 -22 312.713 29.4252 8
 3 -4 -21 323.527 33.7423 8
 3 -4 -20 313.794 35.3887 8
 3 -4 -19 -29.3915 22.7971 8
 -3 -4 18 825.632 55.356 7
 -3 -4 17 205.192 77.0552 2
 3 -4 -17 149.163 55.385 5
 -3 -4 17 121.375 27.0343 7
 -3 -4 16 1018.19 59.5946 7
 -3 -4 16 1036.13 132.681 2
 -3 -4 16 984.04 52.7134 10
 3 -4 -16 789.127 117.341 5
 -3 -4 15 412.202 90.4007 2
 3 -4 -15 273.581 68.4078 5
 -3 -4 15 310.001 37.4243 7
 3 -4 -14 7353.68 321.962 5
 3 -4 -13 3292.53 212.64 5
 3 -4 -12 19470.3 495.508 5
 3 -4 -11 37.9085 47.6363 5
 3 -4 -10 5.85887 37.7494 5
 3 -4 -9 52.9878 39.3175 5
 3 -4 -8 2129.81 147.519 5
 -3 -4 8 2288.47 163.025 4
 3 -4 -7 285.924 60.2535 5
 -3 -4 7 266.947 61.0881 4
 3 -4 -6 4288.95 190.2 5
 -3 -4 6 4461.88 217.455 4
 -3 4 6 4389.54 438.938 1
 -3 -4 5 11853.8 359.008 6
 -3 4 5 12100.1 701.608 1
 3 -4 -5 11486.3 299.058 5
 -3 -4 5 12554 356.103 4
 -3 -4 4 24476.9 502.654 6
 -3 -4 4 25763.5 1173.99 15
 -3 4 4 25670.1 1000.52 1
 3 -4 -4 25026 424.026 5
 -3 -4 4 24566.2 493.357 4
 -3 -4 3 569.374 80.5464 4
 -3 -4 3 622.501 82.8435 6
 -3 -4 3 462.703 183.14 15
 -3 4 3 802.341 184.634 1
 -3 -4 2 24891.6 488.314 6
 -3 4 2 24877.8 955.552 1
 -3 -4 2 23902.8 1096.03 15
 -3 -4 2 24377.5 487.307 4
 -3 -4 1 11494.8 328.135 6
 -3 -4 1 11674.9 761.201 15
 -3 -4 0 6898.37 251.091 6
 -3 -4 0 6827.53 575.449 15
 -3 -4 -1 7748.69 267.859 6
 -3 -4 -1 8085.28 629.003 15
 -3 -4 -2 6213.51 239.162 6
 -3 -4 -2 7042.08 594.896 15
 -3 -4 -3 7423.4 266.705 6
 -3 -4 -4 2522.53 158.073 6
 -3 -4 -5 2462.13 159.706 6
 -3 4 -5 2667.61 136.073 16
 -3 -4 -6 377.416 74.26 6
 -3 4 -6 388.206 59.7759 16
 -3 -4 -7 19116.4 461.458 6
 -3 4 -7 19621.6 395.724 16
 -3 -4 -8 72.8342 41.7212 6
 -3 -4 -9 3264.97 204.855 6
 -3 -4 -10 173.044 61.3755 6
 -3 -4 -11 3587.42 229.141 6
 -3 -4 -12 433.489 89.4838 6
 3 -4 13 -22.9466 43.2569 2
 -3 -4 -13 -16.7066 20.0016 12
 -3 -4 -14 -14.4984 19.1389 12
 -3 4 -14 48.092 16.8558 13
 3 -4 14 62.0242 39.809 2
 -3 -4 -15 5.14498 17.6647 12
 -3 4 -15 -17.5466 16.0688 13
 -3 -4 -16 21.2851 19.9376 12
 -3 4 -16 11.5581 18.0575 13
 -3 4 -16 -8.00972 19.3521 14
 -3 4 -17 1263.56 58.1174 14
 -3 4 -18 2514.03 77.345 14
 -3 4 -19 53.3813 20.2676 11
 -3 4 -19 -3.8564 16.5174 14
 -3 4 -20 92.6485 18.6373 11
 -3 4 -20 71.4687 17.201 14
 3 -5 -22 212.537 22.6606 8
 3 -5 -21 29.629 18.3132 8
 3 -5 -20 119.208 22.8565 8
 3 -5 -19 729.965 47.9976 8
 -3 -5 18 305.628 36.349 7
 3 -5 -18 282.727 33.7416 8
 3 -5 -17 1019.6 58.1724 8
 -3 -5 17 1030.82 51.365 10
 -3 -5 17 1034.56 58.9704 7
 3 -5 -16 3389.89 102.965 8
 -3 -5 16 3528.93 96.465 10
 -3 -5 15 282.612 31.9011 10
 -3 -5 15 301.865 36.4839 7
 3 -5 -15 369.358 85.3127 5
 3 -5 -15 256.33 33.5301 8
 3 -5 -14 1906.61 177.197 5
 3 -5 -14 1770.37 74.611 8
 -3 -5 14 1700.48 69.5639 10
 -3 -5 14 1845.34 78.8586 7
 3 -5 -13 20.692 57.6047 5
 3 -5 -12 813.917 116.596 5
 3 -5 -11 4444.98 248.91 5
 3 -5 -10 585.845 95.0286 5
 -3 -5 9 3.39024 50.507 6
 3 -5 -9 76.6039 50.521 5
 -3 -5 9 25.0164 47.1326 4
 -3 -5 8 173.965 66.3885 6
 -3 -5 8 194.545 65.4941 4
 3 -5 -8 80.5487 57.1122 5
 -3 -5 7 3958.98 239.445 6
 -3 -5 7 3971.51 236.87 4
 3 -5 -7 4001.87 210.47 5
 3 -5 -6 33009.8 580.004 5
 -3 -5 6 32583.5 665.94 6
 -3 -5 6 33442.7 672.576 4
 -3 -5 5 4569.84 244.394 4
 -3 -5 5 4274.61 237.337 6
 3 -5 -5 4419.61 207.069 5
 -3 -5 4 5546.18 266.81 4
 -3 -5 4 5281.25 256.808 6
 -3 -5 3 4000.21 222.334 6
 -3 -5 3 4042.34 228.761 4
 -3 -5 2 903.065 110.046 4
 -3 -5 2 1001.41 112.361 6
 -3 -5 1 -36.5803 48.6444 6
 -3 -5 0 18998.2 468.281 6
 -3 -5 -1 404.601 76.0623 6
 -3 -5 -2 924.845 112.413 6
 -3 -5 -3 4570.24 232.276 6
 -3 -5 -4 2101.78 163.103 6
 -3 -5 -5 730.87 98.4211 6
 -3 -5 -6 362.289 78.3249 6
 -3 -5 -7 419.207 86.9167 6
 -3 -5 -8 8308.44 340.147 6
 -3 -5 -9 3531.3 231.878 6
 -3 -5 -10 2714.02 209.315 6
 -3 -5 -11 -7.12792 16.8837 12
 -3 -5 -11 29.5286 41.1952 6
 3 -5 11 -28.7506 20.6727 7
 -3 -5 -12 944.333 130.863 6
 3 -5 12 794.085 47.9275 7
 -3 -5 -12 801.185 45.6252 12
 3 -5 13 3165.96 91.36 7
 -3 -5 -13 3077.76 86.2118 12
 3 -5 14 748.242 45.8488 7
 -3 -5 -14 779.806 45.1168 12
 -3 -5 -15 521.616 35.9505 12
 3 -5 15 492.517 36.096 7
 -3 5 -16 14.7615 19.0705 14
 -3 5 -17 184.643 27.0022 14
 -3 5 -18 466.205 32.4671 14
 -3 5 -19 108.817 18.5507 14
 3 -6 -20 242.913 24.1358 8
 3 -6 -19 20.4577 15.9028 8
 3 -6 -18 317.505 31.5774 8
 -3 -6 17 24.7263 17.9388 10
 3 -6 -17 -1.54579 19.8901 8
 -3 -6 17 32.9405 21.2028 7
 -3 -6 16 522.91 39.2937 10
 -3 -6 16 502.891 41.4791 7
 3 -6 -16 545.196 43.0528 8
 -3 -6 15 326.152 33.7744 10
 -3 -6 15 325.704 37.2632 7
 3 -6 -15 350.634 37.0447 8
 -3 -6 14 1897.26 72.6877 10
 3 -6 -14 1750.18 74.638 8
 -3 -6 14 1800.44 75.4022 7
 3 -6 -13 3304.28 100.366 8
 -3 -6 13 2917.24 228.059 6
 3 -6 -13 3485.79 238.552 5
 -3 -6 13 3175.6 94.3213 10
 -3 -6 13 3273.78 102.667 7
 3 -6 -12 1776.14 177.132 5
 -3 -6 12 2072.32 196.238 6
 -3 -6 12 1888.87 74.7124 10
 3 -6 -12 1893.45 75.6463 8
 3 -6 -11 1653.22 164.078 5
 -3 -6 11 1862.44 183.418 6
 -3 -6 11 1855.66 73.3312 10
 3 -6 -11 1783.56 73.1091 8
 -3 -6 10 7377.19 357.834 6
 -3 -6 10 7140.43 352.539 4
 3 -6 -10 6948.61 327.077 5
 -3 -6 9 5559.07 307.6 6
 -3 -6 9 5003.37 296.253 4
 3 -6 -9 5686.48 289.55 5
 3 -6 -8 1800.9 161.349 5
 -3 -6 8 1816.4 177.329 6
 -3 -6 8 1554.97 168.905 4
 3 -6 -7 4445.42 239.488 5
 -3 -6 7 4625.49 271.315 6
 -3 -6 7 3820.04 257.557 4
 -3 -6 6 16683.7 508.27 6
 -3 -6 6 16984.4 532.781 4
 -3 -6 5 573.786 97.8308 6
 -3 -6 5 503.935 98.4435 4
 -3 -6 4 619.013 103.013 6
 -3 -6 4 528.069 105.46 4
 -3 -6 3 545.534 94.0489 6
 -3 -6 3 528.841 103.957 4
 -3 -6 2 4695.9 257.388 6
 -3 -6 1 130.735 62.0651 6
 -3 -6 0 300.373 76.1206 6
 -3 -6 -1 215.711 73.3464 6
 -3 -6 -2 936.695 119.489 6
 -3 -6 -3 2448.68 188.927 6
 -3 -6 -4 1095.57 127.128 6
 -3 -6 -5 323.48 77.1496 6
 -3 -6 -6 42.5158 45.8303 6
 -3 -6 -7 1894.94 171.84 6
 -3 -6 -8 157.761 69.9985 6
 3 -6 8 112.119 20.885 7
 3 -6 9 6.5266 17.8065 7
 -3 -6 -9 53.4586 47.3748 6
 -3 -6 -10 101.874 56.2621 6
 3 -6 10 90.03 24.6314 7
 3 -6 11 815.992 49.2514 7
 3 -6 12 195.543 28.5438 7
 3 -6 13 167.206 24.9546 7
 3 -6 14 81.2248 20.9539 7
 3 -6 15 2.44109 15.9351 7
 -3 6 -15 8.4856 17.0617 14
 3 -6 16 166.525 22.7848 7
 -3 6 -16 175.615 23.6303 14
 -3 6 -17 342.977 26.8309 14
 3 -7 -18 14.5482 14.936 8
 3 -7 -17 36.2698 14.6717 8
 -3 -7 17 10.2526 14.3359 10
 -3 -7 16 511.286 34.5707 10
 -3 -7 16 457.681 35.1042 7
 3 -7 -16 448.485 35.3429 8
 3 -7 -15 40.4711 19.5403 8
 -3 -7 15 45.4816 20.2236 10
 -3 -7 15 39.2079 18.14 7
 -3 -7 14 606.23 41.2913 10
 3 -7 -14 539.72 40.2702 8
 -3 -7 13 70.8918 21.9886 10
 3 -7 -13 124.142 25.901 8
 -3 -7 12 57.6166 22.8446 10
 3 -7 -12 54.5187 19.7394 8
 -3 -7 11 103.661 27.2935 10
 3 -7 -11 62.8909 20.5735 8
 -3 -7 10 3845.41 106.649 10
 3 -7 -10 4036.66 255.134 5
 3 -7 -10 3768.9 105.001 8
 -3 -7 10 3625.65 263.829 4
 3 -7 -9 5971.76 130.284 8
 -3 -7 9 5961.07 313.327 6
 -3 -7 9 5738.92 130.037 10
 3 -7 -9 5834.48 301.643 5
 -3 -7 9 5816.82 330.54 4
 3 -7 -8 1076.89 57.0266 8
 -3 -7 8 1151.61 60.1749 10
 -3 -7 8 910.009 130.243 6
 -3 -7 8 1053.91 155.099 4
 -3 -7 7 7260.21 145.323 10
 3 -7 -7 7305.05 142.792 8
 -3 -7 7 7181.44 368.681 4
 -3 -7 7 6931.99 338.372 6
 -3 -7 6 118.711 69.8126 6
 -3 -7 6 61.8192 22.081 10
 3 -7 -6 77.934 21.8653 8
 -3 -7 6 132.538 87.3616 4
 -3 -7 5 330.189 87.7728 4
 -3 -7 5 510.026 97.9319 6
 -3 -7 4 3372.94 235.526 6
 -3 -7 3 414.588 94.4588 6
 -3 -7 2 63.7628 55.419 6
 -3 -7 1 2.81306 52.8498 6
 -3 -7 0 1490.68 156.704 6
 -3 -7 -1 110.368 67.0227 6
 -3 -7 -2 4405.92 266.898 6
 -3 -7 -3 9928.02 395.592 6
 3 -7 3 9839.81 160.135 10
 3 -7 3 10027 160.2 7
 -3 -7 -4 2768.87 210.964 6
 3 -7 4 2968.77 87.8482 10
 3 -7 4 2819.99 86.6996 7
 -3 -7 -5 587.399 104.475 6
 3 -7 5 592.5 42.3304 7
 -3 -7 -6 8.51691 51.4963 6
 3 -7 6 75.4428 22.8352 7
 -3 -7 -7 1800.56 174.133 6
 3 -7 7 1844.72 71.7507 7
 3 -7 8 593.84 43.3562 7
 3 -7 9 2696.64 85.695 7
 3 -7 10 97.8981 24.8305 7
 3 -7 11 282.36 32.4119 7
 3 -7 12 27.8361 21.7799 7
 3 -7 13 53.4968 19.4335 7
 3 -7 14 163.614 23.6288 7
 3 -7 15 241.718 24.134 7
 -3 -8 16 -10.6508 12.1881 10
 -3 -8 15 857.468 39.5734 10
 -3 -8 14 86.7017 19.9201 10
 -3 -8 13 893.091 45.194 10
 -3 -8 12 87.5538 22.992 10
 -3 -8 11 86.8744 24.8317 10
 -3 -8 10 661.65 45.9804 10
 -3 -8 9 926.859 52.9973 10
 -3 -8 8 107.354 25.8181 10
 -3 -8 7 169.79 27.7285 10
 -3 -8 6 660.371 46.1325 10
 -3 -8 5 1939.55 74.9207 10
 3 -8 -5 1827.58 75.9191 10
 -3 -8 4 1217.1 60.3432 10
 3 -8 -4 1229.91 61.8274 10
 3 -8 -3 143.961 28.6193 10
 -3 -8 2 -12.4666 54.4551 6
 3 -8 -2 14.6808 19.6605 10
 -3 -8 1 3234.49 227.546 6
 3 -8 -1 3532.06 102.615 10
 3 -8 0 194.394 29.8651 10
 3 -8 1 2864.79 91.2631 10
 3 -8 2 276.438 32.5221 10
 3 -8 3 93.9339 20.26 7
 3 -8 3 128.8 23.7004 10
 3 -8 4 1511.97 63.4965 7
 3 -8 4 1598.87 65.5977 10
 3 -8 5 1976.7 70.1642 10
 3 -8 5 1927.48 71.6197 7
 3 -8 6 141.471 25.1147 7
 3 -8 7 17.1439 17.71 7
 3 -8 8 14.4443 16.9276 7
 3 -8 9 1550.27 61.3117 7
 3 -8 10 -5.57223 17.5156 7
 3 -8 11 131.636 22.9953 7
 3 -8 12 91.2411 19.3452 7
 3 -8 13 33.2314 15.4024 7
 -3 -9 13 181.868 19.7434 10
 -3 -9 12 79.9303 17.1118 10
 -3 -9 11 9.28276 14.9721 10
 -3 -9 10 165.479 23.2608 10
 -3 -9 9 2933.67 78.2785 10
 3 -9 -9 2757.22 74.6436 10
 -3 -9 8 122.943 24.4973 10
 3 -9 -8 123.361 22.8052 10
 -3 -9 7 1253.97 55.0148 10
 3 -9 -7 1224.78 55.0747 10
 3 -9 -6 -9.34094 18.4189 10
 -3 -9 6 -7.66246 17.4077 10
 -3 -9 5 408.021 35.0404 10
 3 -9 -5 382.626 36.0788 10
 -3 -9 4 229.23 27.6435 10
 3 -9 -4 251.852 31.1066 10
 3 -9 -3 2.50747 21.3 10
 3 -9 -2 860.548 49.6758 10
 3 -9 -1 1631.84 66.4524 10
 3 -9 0 405.764 35.8032 10
 3 -9 1 2.4887 19.0706 10
 3 -9 2 313.447 31.8023 10
 3 -9 3 79.5878 19.6804 10
 3 -9 4 321.916 30.7131 10
 3 -9 5 21.749 15.3219 10
 3 -9 5 -3.98935 15.405 7
 3 -9 6 278.395 25.9112 7
 3 -9 7 436.793 30.9435 7
 3 -9 8 18.8469 13.8209 7
 3 -9 9 357.011 27.0777 7
 3 -9 10 80.9909 15.5903 7
 -3 -10 6 605.273 31.2649 10
 3 -10 -6 616.999 32.7119 10
 -3 -10 5 114.593 17.0713 10
 3 -10 -5 75.0871 17.2413 10
 3 -10 -4 88.4503 17.9457 10
 3 -10 -3 116.047 19.5927 10
 3 -10 -2 108.848 19.5588 10
 3 -10 -1 307.385 26.6979 10
 3 -10 0 9.69685 14.7187 10
 3 -10 1 428.82 29.547 10
 3 -10 2 58.0478 16.4271 10
 3 -10 3 288.464 24.1566 10
 3 -10 4 370.519 24.6738 10
 4 0 -24 490.71 34.3164 14
 4 0 -23 -14.0753 19.9643 14
 4 0 -22 146.065 29.7115 14
 4 0 -21 33.929 22.9503 14
 4 0 -20 949.414 57.7304 14
 -4 0 19 -12.9084 48.8462 2
 4 0 -19 -16.3135 25.5186 14
 4 0 -18 3194.28 103.522 14
 -4 0 18 2990.34 225.419 2
 -4 0 17 10.4611 50.5869 2
 -4 0 16 602.232 99.9177 2
 -4 0 15 24.2102 50.1606 2
 -4 0 14 1277.07 136.911 2
 -4 0 13 -17.7663 37.6318 2
 -4 0 12 19370.7 463.678 2
 -4 0 11 -1.48843 42.312 2
 -4 0 10 6126.04 238.055 2
 -4 0 10 5896.24 497.742 1
 -4 0 9 47.7757 34.9144 2
 -4 0 9 155.223 98.4044 1
 -4 0 8 2201.94 132.441 2
 -4 0 8 2030.7 265.291 1
 -4 0 7 17.0606 31.6344 2
 -4 0 7 -6.71845 56.3264 1
 -4 0 6 1578.49 213.9 1
 -4 0 5 9.42456 52.3502 1
 -4 0 4 36275.4 917.442 1
 -4 0 3 -43.3336 80.9805 1
 -4 0 2 1042.29 140.367 15
 -4 0 1 -14.6855 48.2027 15
 -4 0 0 749.01 147.006 15
 -4 0 -1 52.7531 61.6409 15
 -4 0 -2 136287 2043.35 17
 -4 0 -3 -95.2826 94.6847 17
 -4 0 -3 -2.52211 28.6266 16
 -4 0 -4 4119.55 405.004 17
 -4 0 -4 4309.73 160.754 16
 -4 0 -5 12.8379 70.5278 17
 -4 0 -5 -7.91484 26.0893 16
 -4 0 -6 2733.21 385.016 17
 -4 0 -6 2549.63 131.598 16
 -4 0 -7 -1.36136 30.9625 16
 -4 0 -8 8358.52 254.848 16
 -4 0 -9 34.0971 31.1529 16
 -4 0 -10 526.587 74.2308 16
 -4 0 -11 -6.38361 32.5856 16
 -4 0 -12 43065.9 649.614 16
 4 0 13 53.6262 42.3416 2
 4 0 14 674.107 98.6032 2
 -4 0 -14 717.834 41.4066 13
 -4 0 -15 28.3167 18.504 13
 4 0 15 60.0791 46.0996 2
 -4 0 -16 3513.61 87.1224 13
 -4 0 -17 28.3437 23.2946 11
 -4 0 -17 -9.42865 15.6616 13
 -4 0 -18 2016.7 76.8542 11
 -4 0 -18 2016.62 62.5308 13
 -4 0 -19 0.61943 21.1326 11
 -4 0 -19 0.71711 13.7965 13
 -4 0 -20 1101.59 50.1291 11
 -4 0 -21 -0.45507 14.9017 11
 4 1 -24 24.031 16.1595 14
 4 -1 -24 32.0304 16.9015 14
 4 1 -23 11.9227 18.3952 14
 4 -1 -23 6.5888 17.7734 14
 4 1 -22 360.436 37.4651 14
 4 -1 -22 314.964 34.8791 14
 4 -1 -21 883.953 55.6329 14
 4 1 -21 1024.06 58.4697 14
 4 -1 -20 1142.27 63.8322 14
 4 1 -20 1204.81 64.634 14
 -4 -1 19 837.175 125.362 2
 4 1 -19 1018.7 60.9771 14
 4 -1 -19 880.329 58.3395 14
 4 -1 -18 1614.4 74.0115 14
 4 1 -18 1439.72 70.7335 14
 -4 -1 18 1570.99 169.621 2
 -4 -1 17 721.923 120.871 2
 -4 1 16 14548.9 449.033 2
 -4 -1 16 13380.3 474.155 2
 -4 1 15 186.879 60.4447 2
 -4 -1 15 264.018 85.9379 2
 -4 1 14 3761.57 213.714 2
 -4 -1 14 3400.19 228.495 2
 -4 1 13 6461.35 269.375 2
 -4 -1 13 6102.58 289.16 2
 -4 1 12 2096.29 148.133 2
 -4 -1 12 1991.41 159.026 2
 -4 -1 11 1890.77 145.715 2
 -4 1 11 1929.96 137.578 2
 -4 -1 10 15540.8 392.086 2
 -4 1 10 15898.5 367.041 2
 -4 1 10 15903 850.461 1
 -4 1 9 21279.2 408.363 2
 -4 -1 9 21171.7 436.144 2
 -4 1 8 326.569 51.8752 2
 -4 -1 8 302.47 57.3923 2
 -4 1 8 415.026 140.858 1
 -4 -1 7 16779.3 352.909 2
 -4 1 7 16284.7 748.886 1
 -4 1 7 16554 333.792 2
 -4 1 6 55850.6 1348.19 1
 -4 -1 6 55287.2 615.642 2
 -4 1 5 1427.42 220.235 1
 -4 1 4 36099.6 1017.28 1
 -4 -1 4 40531.9 974.115 15
 -4 1 3 -4.96309 96.1377 1
 -4 -1 3 66.7932 84.6285 15
 -4 -1 2 32772.5 906.424 15
 -4 1 2 32075.5 927.701 1
 -4 -1 1 460.677 120.792 15
 -4 -1 0 2487.62 262.822 15
 -4 -1 -1 407.205 128.358 15
 -4 -1 -2 6609.69 455.28 15
 -4 -1 -3 12542 273.6 16
 -4 -1 -3 12924 666.989 15
 -4 1 -3 12592.2 266.66 16
 -4 -1 -4 960.293 194.163 17
 -4 -1 -4 1058.17 82.6915 16
 -4 -1 -4 922.565 200.755 15
 -4 1 -4 995.059 80.086 16
 -4 -1 -5 138.433 37.7993 16
 -4 1 -5 127.955 33.8846 16
 -4 1 -6 733.146 74.9278 16
 -4 -1 -6 652.323 184.37 17
 -4 1 -6 750.757 193.091 17
 -4 -1 -6 903.288 78.7253 16
 -4 1 -7 2046.32 127.404 16
 -4 -1 -7 2176.87 123.786 16
 -4 1 -8 1597.36 117.02 16
 -4 -1 -8 1522.89 107.661 16
 -4 1 -9 100.712 42.9256 16
 -4 1 -10 675.182 84.055 16
 -4 1 -11 2915.18 172.746 16
 -4 1 -12 977.738 105.882 16
 4 1 13 -10.1324 35.5475 2
 4 -1 13 3.91049 45.612 2
 -4 1 -13 23.3224 40.2577 16
 -4 -1 -14 233.614 26.4994 12
 -4 1 -14 220.617 26.6301 13
 4 -1 14 312.284 66.8875 2
 -4 -1 -14 246.76 32.9218 11
 -4 -1 -15 53.4576 17.0425 12
 4 -1 15 7.93025 41.5846 2
 -4 -1 -15 -13.8006 23.8062 11
 -4 1 -15 59.0239 18.9414 13
 -4 -1 -16 122.865 21.8417 12
 -4 -1 -16 105.702 24.9595 11
 -4 1 -16 113.143 22.5787 13
 -4 -1 -17 407.146 37.7354 11
 -4 1 -17 457.958 34.5047 13
 -4 -1 -18 1258.92 60.449 11
 -4 1 -18 1309.26 63.8028 11
 -4 1 -18 1234.74 50.7187 13
 -4 -1 -19 700.078 43.2545 11
 -4 1 -19 759.462 47.3853 11
 -4 1 -19 675.067 37.4875 13
 -4 -1 -20 97.1861 19.7909 11
 -4 1 -20 89.2437 21.3552 11
 -4 1 -21 3.46309 14.5298 11
 4 -2 -24 209.286 21.9765 14
 4 2 -24 182.183 21.6331 14
 4 -2 -23 432.978 32.9713 14
 4 2 -23 484.789 34.8677 14
 4 -2 -22 231.216 28.5908 14
 4 2 -22 305.077 33.2221 14
 4 -2 -21 353.102 36.0873 14
 4 2 -21 413.193 39.5138 14
 4 2 -20 947.908 57.0876 14
 4 -2 -20 931.705 55.8775 14
 4 -2 -19 301.118 37.3831 14
 4 2 -19 404.445 40.4694 14
 -4 -2 18 2742.03 223.545 2
 4 2 -18 2992.19 98.5769 14
 4 -2 -18 2839.59 95.7611 14
 -4 -2 17 769.493 127.076 2
 4 2 -17 810.289 53.02 14
 4 -2 -17 818.289 52.8532 14
 -4 -2 16 600.713 112.796 2
 4 -2 -15 4683.05 235.404 5
 -4 -2 15 4612.71 276.248 2
 -4 -2 14 896.484 123.413 2
 4 -2 -14 976.288 108.633 5
 4 -2 -13 1968.46 148.404 5
 -4 -2 13 1737.76 167.202 2
 -4 -2 12 1759.32 160.149 2
 -4 -2 11 1239.25 126.747 2
 -4 -2 10 610.254 93.387 2
 -4 -2 9 94.2632 38.1458 2
 -4 -2 8 1959.27 134.685 2
 -4 2 8 1911.34 283.79 1
 -4 -2 7 17961.9 379.986 2
 -4 2 7 18172.5 853.292 1
 -4 -2 6 678.35 74.2233 2
 -4 2 6 461.618 147.288 1
 -4 -2 6 508.761 163.339 15
 -4 -2 5 28880.8 1008.11 15
 -4 2 5 25698.5 957.443 1
 -4 2 4 2288.58 277.33 1
 -4 -2 4 2702.73 312.512 15
 -4 2 3 30699.2 1006.95 1
 -4 -2 3 34044.6 1060.94 15
 -4 -2 2 101.931 83.1909 15
 -4 2 2 72.6625 88.5422 1
 -4 -2 1 12276.6 648.935 15
 -4 -2 0 15690.3 746.56 15
 -4 -2 -1 18460.1 822.909 15
 -4 -2 -2 49287.7 1370.72 15
 -4 2 -2 49623 520.798 16
 -4 -2 -3 13028.1 286.426 16
 -4 -2 -3 13452.7 735.83 15
 -4 2 -3 12936.1 276.4 16
 -4 -2 -4 4509.9 170.136 16
 -4 2 -4 4518.63 171.514 16
 -4 -2 -4 4208.45 436.797 15
 -4 2 -5 16.0187 27.7639 16
 -4 -2 -5 -29.6168 107.909 15
 -4 -2 -6 2549.67 362.125 17
 -4 2 -6 2575.09 139.767 16
 -4 2 -7 1210.61 103.781 16
 -4 2 -8 330.422 61.8421 16
 -4 2 -9 6502.12 248.141 16
 -4 2 -10 66.359 46.4518 16
 -4 2 -11 1157.99 114.962 16
 -4 2 -12 8665.71 302.546 16
 4 -2 13 635.281 94.3958 2
 -4 2 -13 773.297 42.2393 13
 -4 -2 -14 506.446 37.5371 12
 4 -2 14 546.002 84.8006 2
 -4 2 -14 495.362 35.6127 13
 -4 -2 -15 659.08 41.1197 12
 4 -2 15 547.756 87.9164 2
 -4 2 -15 677.751 41.3129 13
 -4 -2 -16 1362.51 56.8247 12
 -4 2 -16 1298.66 54.7308 13
 -4 2 -16 1219.54 59.2169 14
 -4 2 -17 25.5789 17.7256 14
 -4 2 -17 -10.1419 18.1262 13
 -4 2 -18 -21.0879 16.8158 14
 -4 2 -18 34.5477 18.1684 13
 -4 2 -19 352.921 33.826 11
 -4 2 -20 12.2407 16.824 11
 4 -3 -23 99.1263 18.5371 8
 4 3 -23 117.734 20.5691 14
 4 -3 -22 142.179 23.3305 8
 4 3 -22 143.025 23.9135 14
 4 -3 -21 2.29522 17.8547 8
 4 3 -21 6.17943 18.0319 14
 4 -3 -20 156.822 26.8653 8
 4 -3 -20 200.927 29.1909 14
 4 3 -20 166.209 27.3757 14
 4 -3 -19 187.969 31.7139 8
 4 -3 -19 249.457 32.189 14
 4 3 -19 238.717 31.1245 14
 4 -3 -18 2423.82 85.4572 14
 -4 -3 17 862.854 125.194 2
 4 -3 -17 934.341 55.698 14
 -4 -3 16 49.3864 22.2793 10
 -4 -3 16 -9.10127 54.9257 2
 4 -3 -16 -33.3083 40.3245 5
 4 -3 -16 -39.4631 21.4343 14
 4 -3 -15 7147 307.007 5
 -4 -3 15 7271.52 349.089 2
 -4 -3 14 987.557 135.052 2
 4 -3 -14 777.037 106.811 5
 -4 -3 13 12893.9 441.376 2
 4 -3 -13 13442.7 403.437 5
 -4 -3 12 76.8699 57.0421 2
 4 -3 -12 28.7615 44.2266 5
 -4 -3 11 115.741 54.4107 2
 4 -3 -11 305.913 71.1727 5
 -4 -3 10 1648.28 142.665 2
 -4 -3 9 5218.97 234.053 2
 -4 -3 8 568.647 78.8114 2
 -4 -3 7 29.9836 27.3874 2
 -4 -3 7 -578.818 192.043 15
 -4 3 6 2982.86 367.459 1
 -4 -3 6 2843.83 394.3 15
 -4 3 5 465.459 142.803 1
 -4 -3 5 430.226 160.143 15
 -4 3 4 1005.95 209.249 1
 -4 -3 4 832.341 91.02 6
 -4 -3 4 820.854 187.327 15
 -4 -3 3 89872.7 901.52 6
 -4 3 3 89019.5 1859.77 1
 -4 -3 3 90345.8 2020.91 15
 -4 -3 2 676.502 81.2159 6
 -4 -3 2 612.592 170.965 15
 -4 3 2 775.779 174.129 1
 -4 -3 1 20775 417.94 6
 -4 -3 1 21770.1 978.524 15
 -4 -3 0 2511.48 146.179 6
 -4 -3 0 2816.69 145.12 16
 -4 -3 0 2524.46 348.493 15
 -4 -3 -1 54471.7 663.924 6
 -4 -3 -1 54405.6 1572.38 15
 -4 -3 -2 2485.02 145.102 6
 -4 -3 -2 2342.61 351.73 15
 -4 3 -2 2254.35 117.035 16
 -4 -3 -3 16511.2 372.5 6
 -4 3 -3 16732.5 328.605 16
 -4 -3 -3 16546.3 906.904 15
 -4 -3 -4 125.841 48.8017 6
 -4 3 -4 113.311 34.6737 16
 -4 -3 -5 2749.43 158.721 6
 -4 3 -5 2268.15 132.952 16
 -4 -3 -6 3190.65 174.79 6
 -4 3 -6 3322.08 167.334 16
 -4 -3 -7 772.93 94.854 6
 -4 3 -7 795.124 89.0895 16
 -4 -3 -8 44.4841 41.5624 6
 -4 3 -8 11.304 38.4833 16
 -4 3 -9 308.459 60.8365 16
 -4 3 -10 2206.07 153.733 16
 -4 3 -11 4988.28 230.975 16
 4 -3 12 632.823 93.9888 2
 -4 -3 -13 109.173 23.2657 12
 -4 3 -13 106.579 19.0496 13
 -4 -3 -14 326.465 32.2028 12
 -4 3 -14 299.376 27.3219 13
 -4 -3 -15 59.5148 20.2219 12
 -4 3 -15 60.894 19.2564 13
 -4 -3 -16 1570.74 61.1334 12
 -4 3 -16 1535.03 64.1368 14
 -4 3 -16 1619.93 60.1767 13
 -4 3 -17 28.3397 18.2483 13
 -4 3 -17 29.5148 20.503 14
 -4 3 -18 19.3309 16.5798 14
 -4 3 -18 29.249 16.6707 13
 -4 3 -19 854.756 45.0509 11
 -4 3 -19 817.413 40.0186 14
 -4 3 -20 788.446 38.7523 11
 4 -4 -22 -39.8617 17.5771 8
 4 -4 -21 -3.17331 17.0892 8
 4 -4 -20 165.81 26.6545 8
 4 -4 -19 115.294 27.2594 8
 4 -4 -18 960.645 57.5699 8
 -4 -4 17 270.945 30.9753 10
 4 -4 -17 288.44 34.7453 8
 -4 -4 16 251.156 30.9607 10
 4 -4 -16 162.826 55.8436 5
 4 -4 -16 229.352 33.3528 8
 -4 -4 16 261.703 35.6873 7
 4 -4 -15 6573.95 142.037 8
 -4 -4 15 6727.67 137.364 10
 -4 -4 15 6425.61 146.775 7
 4 -4 -15 6629.93 311.931 5
 4 -4 -14 254.947 75.178 5
 4 -4 -13 2891.78 206.022 5
 4 -4 -12 5895.09 279.691 5
 4 -4 -11 5087.01 252.853 5
 4 -4 -10 -10.8513 40.8921 5
 4 -4 -9 41.9611 41.3627 5
 4 -4 -8 77.7405 46.224 5
 4 -4 -7 8879.18 296.393 5
 -4 -4 6 467.276 86.063 6
 4 -4 -6 470.098 74.6621 5
 -4 -4 5 12252.6 386.247 6
 -4 -4 5 13088.8 377.053 4
 4 -4 -5 12169.5 321.343 5
 -4 -4 4 6072.15 267.496 6
 -4 -4 4 6300.98 260.824 4
 4 -4 -4 6105.35 219.385 5
 -4 -4 3 3204.14 191.677 6
 -4 -4 2 2833.45 177.793 6
 -4 -4 1 5539.93 241.429 6
 -4 -4 0 3847.84 199.455 6
 -4 -4 -1 22345.5 481.336 6
 -4 -4 -2 61.1079 37.2746 6
 -4 -4 -3 330.089 65.0428 6
 -4 -4 -4 24.7024 36.4969 6
 -4 -4 -5 8431.29 307.778 6
 -4 4 -5 8712.39 264.93 16
 -4 4 -6 913.533 93.9755 16
 -4 -4 -6 794.534 102.029 6
 -4 -4 -7 62.5708 49.5093 6
 -4 4 -7 -48.9367 35.6472 16
 -4 -4 -8 1235.39 131.831 6
 -4 4 -8 1315.62 115.447 16
 -4 -4 -9 2586.93 188.82 6
 -4 4 -9 2448.52 159.208 16
 -4 -4 -10 7143.59 320.265 6
 -4 -4 -11 1653.03 65.0663 12
 -4 -4 -11 1777.09 164.148 6
 -4 -4 -12 524.098 39.0423 12
 -4 -4 -13 750.491 46.2868 12
 -4 4 -13 741.724 40.2139 13
 -4 -4 -14 560.553 40.0618 12
 -4 4 -14 650.276 38.1009 13
 -4 -4 -15 48.1502 20.5976 12
 -4 4 -15 64.2067 18.5658 13
 -4 -4 -16 405.922 34.1518 12
 -4 4 -16 457.299 37.3308 14
 -4 4 -16 382.618 28.9507 13
 -4 4 -17 92.4507 21.7242 14
 -4 4 -18 0.93388 15.5388 14
 -4 4 -19 13.695 15.0506 11
 -4 4 -19 9.37448 13.2091 14
 4 -5 -21 65.18 18.0765 8
 4 -5 -20 114.179 23.3032 8
 4 -5 -19 824.329 49.1164 8
 4 -5 -18 29.9463 21.118 8
 4 -5 -17 28.4674 24.3932 8
 -4 -5 17 28.0384 19.8244 10
 4 -5 -16 1073.8 61.4084 8
 -4 -5 16 1016.64 55.844 10
 -4 -5 16 970.846 58.516 7
 4 -5 -15 8118.66 356.351 5
 -4 -5 15 8325.58 153.22 10
 -4 -5 15 8130.72 163.312 7
 4 -5 -15 8352.35 160.898 8
 4 -5 -14 765.171 52.3067 8
 -4 -5 14 736.814 50.2147 10
 4 -5 -14 739.846 119.684 5
 -4 -5 14 837.011 56.8321 7
 4 -5 -13 163.217 27.3512 8
 -4 -5 13 210.317 29.8271 10
 -4 -5 13 159.884 29.4078 7
 4 -5 -12 391.299 84.2784 5
 -4 -5 11 83.8732 56.4041 6
 4 -5 -11 -18.4658 57.618 5
 -4 -5 10 5.64916 59.7296 6
 4 -5 -10 37.4187 49.3649 5
 -4 -5 9 33.5798 56.6897 6
 4 -5 -9 42.8658 42.717 5
 -4 -5 8 3487.87 244.482 6
 4 -5 -8 3383.54 203.769 5
 -4 -5 7 4083.81 256.595 6
 -4 -5 7 3900.59 241.614 4
 4 -5 -7 3873.85 210.965 5
 -4 -5 6 9857.78 389.193 6
 -4 -5 6 10225 383.276 4
 4 -5 -6 10177.4 327.525 5
 -4 -5 5 493.701 97.9899 4
 -4 -5 5 410.78 98.3418 6
 -4 -5 4 -11.2564 61.577 6
 -4 -5 3 108.279 55.9035 6
 -4 -5 2 5327.17 268.187 6
 -4 -5 1 301.637 76.6261 6
 -4 -5 0 4232.62 236.041 6
 -4 -5 -1 922.188 118.165 6
 -4 -5 -2 685.989 103.359 6
 -4 -5 -3 2509.36 183.504 6
 -4 -5 -4 2104.08 171.858 6
 -4 -5 -5 2257.58 174.587 6
 -4 -5 -6 5005.46 262.473 6
 -4 -5 -7 709.922 110.262 6
 -4 -5 -8 583.901 99.8532 6
 -4 -5 -9 3492.12 232.474 6
 -4 -5 -9 3247.56 88.4309 12
 4 -5 9 3191.34 90.992 7
 -4 -5 -10 1550.34 158.879 6
 -4 -5 -10 1608.35 63.5387 12
 4 -5 10 1566.48 64.301 7
 -4 -5 -11 1781.81 66.9302 12
 4 -5 11 1876.54 70.1839 7
 -4 -5 -11 1747.02 166.902 6
 -4 -5 -12 25.3401 16.4373 12
 4 -5 12 18.9071 18.567 7
 -4 -5 -13 0.48192 17.1028 12
 -4 -5 -14 46.6226 18.497 12
 -4 -5 -15 1176.08 50.8174 12
 -4 5 -16 546.623 37.4681 14
 -4 5 -17 21.3929 15.2253 14
 -4 5 -18 25.4321 14.7776 14
 4 -6 -20 22.6819 16.0133 8
 4 -6 -19 44.378 18.6836 8
 4 -6 -18 451.491 37.3815 8
 -4 -6 17 15.8251 18.6814 10
 4 -6 -17 -9.91624 21.5872 8
 4 -6 -16 58.4721 23.9952 8
 -4 -6 16 32.4605 20.3094 10
 -4 -6 15 1078.25 56.4482 10
 -4 -6 15 1055.36 57.9336 7
 4 -6 -15 987.905 56.4166 8
 -4 -6 14 37.5841 22.3287 10
 4 -6 -14 25.2044 20.1544 8
 -4 -6 13 90.9464 25.6401 10
 4 -6 -13 97.8636 24.0728 8
 -4 -6 12 996.612 56.3483 10
 -4 -6 12 1096.02 150.492 6
 4 -6 -12 1017.59 132.99 5
 4 -6 -12 1035.74 58.1044 8
 -4 -6 11 58.9722 22.9536 10
 -4 -6 11 126.265 64.3191 6
 4 -6 -11 41.8101 19.9713 8
 4 -6 -11 77.738 55.8682 5
 -4 -6 10 412.709 38.2875 10
 -4 -6 10 307.298 89.4768 6
 4 -6 -10 524.227 94.8693 5
 4 -6 -10 374.845 38.0661 8
 -4 -6 9 1262.44 157.049 6
 4 -6 -9 1644.68 158.603 5
 -4 -6 8 213.549 73.9645 6
 4 -6 -8 283.672 72.9994 5
 -4 -6 8 316.405 93.337 4
 -4 -6 7 5578.24 311.326 6
 -4 -6 7 5398.67 307.24 4
 -4 -6 6 510.907 110.083 6
 -4 -6 6 420.952 90.6405 4
 -4 -6 5 4065.52 261.078 6
 -4 -6 4 103.014 48.1824 6
 -4 -6 3 398.331 91.1817 6
 -4 -6 2 3518.51 234.993 6
 -4 -6 1 2259.92 186.449 6
 -4 -6 0 905.97 119.428 6
 -4 -6 -1 8815.89 364.124 6
 -4 -6 -2 4825.45 272.377 6
 -4 -6 -3 2019.04 179.71 6
 -4 -6 -4 870.195 120.985 6
 -4 -6 -5 3116.36 222.06 6
 -4 -6 -6 17.211 52.0544 6
 4 -6 6 102.58 21.8954 7
 -4 -6 -7 1648.2 162.358 6
 4 -6 7 1621.08 67.0963 7
 -4 -6 -8 255.698 74.5357 6
 4 -6 8 271.774 32.568 7
 -4 -6 -9 12.7434 46.2713 6
 4 -6 9 0.9783 20.2981 7
 4 -6 10 354.155 34.9646 7
 4 -6 11 216.571 28.3513 7
 -4 -6 -12 131.57 21.1635 12
 4 -6 12 153.483 26.5692 7
 -4 -6 -13 653.749 37.6712 12
 4 -6 13 615.112 39.9683 7
 -4 -6 -14 41.0979 15.728 12
 4 -6 14 20.7662 15.1279 7
 -4 6 -15 756.638 39.9531 14
 -4 6 -16 -4.54436 14.6468 14
 4 -7 -18 257.145 24.0869 8
 4 -7 -17 468.907 32.6106 8
 -4 -7 17 481.517 30.7063 10
 -4 -7 16 0.23955 15.6968 10
 4 -7 -16 0.33693 17.0612 8
 -4 -7 15 366.535 32.6425 10
 4 -7 -15 302.658 31.2781 8
 -4 -7 14 55.9445 23.8741 10
 4 -7 -14 16.7016 19.2672 8
 -4 -7 13 82.9945 24.541 10
 4 -7 -13 55.5068 20.0084 8
 -4 -7 12 103.895 25.0445 10
 4 -7 -12 125.661 24.3941 8
 4 -7 -11 665.772 47.2757 8
 -4 -7 11 635.138 45.1252 10
 -4 -7 10 69.0032 24.0698 10
 4 -7 -10 70.7515 25.2844 8
 -4 -7 9 1676.86 71.6159 10
 4 -7 -9 1672.65 71.3266 8
 -4 -7 8 133.456 58.6349 6
 -4 -7 8 165.791 27.3508 10
 4 -7 -8 138.785 28.4707 8
 -4 -7 7 36.7207 55.0038 6
 -4 -7 7 27.2844 20.8664 10
 4 -7 -7 2.62225 21.1763 8
 4 -7 -6 674.73 47.4545 8
 -4 -7 6 777.704 49.602 10
 -4 -7 6 800.928 125.56 6
 -4 -7 5 -25.1229 42.7427 6
 4 -7 -5 34.7208 20.5883 8
 -4 -7 4 67.4432 59.1035 6
 4 -7 -4 103.754 25.2537 8
 -4 -7 3 65.7307 52.828 6
 4 -7 -3 102.542 27.0795 8
 -4 -7 2 25.4771 54.9982 6
 4 -7 -2 37.8394 17.9641 7
 4 -7 -2 36.9645 22.0861 8
 -4 -7 1 2407.6 205.855 6
 4 -7 -1 2383.43 79.3062 7
 4 -7 -1 2518.23 85.802 8
 -4 -7 0 1772.71 178.941 6
 4 -7 0 1715.98 69.7011 10
 4 -7 0 2018.35 76.0945 8
 4 -7 0 1740.63 68.5875 7
 -4 -7 -1 -19.9655 50.0539 6
 4 -7 1 -24.2783 18.1171 10
 4 -7 1 -22.6682 18.0334 7
 -4 -7 -2 314.288 83.5429 6
 4 -7 2 306.266 32.9834 10
 4 -7 2 270.265 31.6318 7
 -4 -7 -3 5922.22 312.286 6
 4 -7 3 6099.58 127.768 7
 -4 -7 -4 1617.37 167.118 6
 4 -7 4 1507.99 65.7368 7
 -4 -7 -5 1812.02 180.071 6
 4 -7 5 1696.11 68.9731 7
 4 -7 6 3285.58 95.0773 7
 4 -7 7 25.9605 19.9994 7
 4 -7 8 23.0523 20.3822 7
 4 -7 9 1066.74 54.5591 7
 4 -7 10 115.902 24.0431 7
 4 -7 11 542.183 38.7503 7
 4 -7 12 204.388 24.9214 7
 4 -7 13 365.66 29.4548 7
 4 -7 14 204.025 21.229 7
 -4 7 -14 236.114 22.2495 14
 -4 -8 15 207.483 22.0457 10
 4 -8 -15 229.39 22.8574 8
 -4 -8 14 33.2933 16.3991 10
 4 -8 -14 65.9208 19.52 8
 -4 -8 13 -2.97732 16.4567 10
 4 -8 -13 -3.29029 15.4661 8
 -4 -8 12 785.909 44.7118 10
 4 -8 -12 712.816 42.357 8
 -4 -8 11 580.065 40.7457 10
 4 -8 -11 627.995 40.9673 8
 -4 -8 10 3277.95 90.1162 10
 4 -8 -10 3167.32 88.3424 8
 4 -8 -9 359.386 34.5753 8
 -4 -8 9 400.351 37.5074 10
 4 -8 -8 375.154 35.8298 8
 -4 -8 8 337.247 35.3014 10
 -4 -8 7 3779.34 101.183 10
 4 -8 -7 3663.3 98.8391 8
 4 -8 -6 512.655 40.355 8
 -4 -8 6 488.558 39.3227 10
 4 -8 -5 1175.3 57.3266 8
 4 -8 -4 589.775 45.1347 10
 4 -8 -4 532.828 41.1565 8
 4 -8 -3 594.05 44.9181 10
 4 -8 -2 -1.52896 20.2186 10
 4 -8 -1 503.945 40.087 10
 4 -8 0 838.238 47.1504 7
 4 -8 0 807.47 49.1405 10
 4 -8 1 226.878 30.4762 10
 4 -8 1 215.647 27.5634 7
 4 -8 2 32.4794 20.6677 10
 4 -8 2 6.43999 17.4658 7
 4 -8 3 55.893 18.8953 10
 4 -8 3 34.296 18.0767 7
 4 -8 4 -24.5469 19.4266 7
 4 -8 5 107.703 23.9088 7
 4 -8 6 370.711 33.5208 7
 4 -8 7 239.992 29.1475 7
 4 -8 8 754.025 43.6055 7
 4 -8 9 -18.6193 18.0627 7
 4 -8 10 103.049 19.6562 7
 4 -8 11 64.9986 16.2943 7
 4 -8 12 512.39 29.652 7
 -4 -9 12 36.7125 14.6353 10
 -4 -9 11 954.911 40.6251 10
 4 -9 -11 861.251 37.9673 10
 4 -9 -10 76.1507 18.093 10
 -4 -9 10 50.9465 15.5927 10
 -4 -9 9 809.747 40.6174 10
 4 -9 -9 754.044 40.3143 10
 -4 -9 8 179.811 24.0781 10
 4 -9 -8 186.407 26.3142 10
 -4 -9 7 45.1745 16.6999 10
 4 -9 -7 67.1135 20.1531 10
 4 -9 -6 381.939 33.7155 10
 4 -9 -5 890.105 48.6189 10
 4 -9 -4 38.8229 20.4709 10
 4 -9 -3 282.854 31.6263 10
 4 -9 -2 1290.1 56.9428 10
 4 -9 -1 36.43 19.5145 10
 4 -9 0 569.422 38.6277 10
 4 -9 1 117.222 22.5289 10
 4 -9 2 474.932 33.341 10
 4 -9 3 20.0223 16.1098 10
 4 -9 3 12.3893 14.9397 7
 4 -9 4 52.198 17.1296 7
 4 -9 5 54.7151 16.1433 7
 4 -9 6 1802.34 56.6058 7
 4 -9 7 74.0748 16.9644 7
 4 -9 8 66.2005 14.8139 7
 4 -10 -5 14.8093 12.6413 10
 4 -10 -4 281.349 23.7818 10
 4 -10 -3 38.8567 14.1526 10
 4 -10 -2 10.7814 13.9898 10
 4 -10 -1 175.321 20.0274 10
 4 -10 0 303.104 23.2995 10
 5 0 -24 -31.6847 18.8931 14
 5 0 -23 25.6653 18.1353 14
 5 0 -22 5.45776 22.0733 14
 5 0 -21 435.859 41.8448 14
 5 0 -20 -9.82631 24.2052 14
 5 0 -19 -12.273 26.2221 14
 -5 0 18 -17.646 52.5056 2
 5 0 -18 -4.31412 23.6138 14
 5 0 -17 11606.1 194.534 14
 -5 0 17 11485.9 437.861 2
 -5 0 16 2.22145 54.0963 2
 -5 0 15 75.38 54.775 2
 -5 0 14 -28.8306 49.8905 2
 -5 0 13 1108.19 128.484 2
 -5 0 12 20.3531 40.5529 2
 -5 0 11 159.608 57.2297 2
 -5 0 10 22.7188 34.8444 2
 -5 0 9 175.118 54.6362 2
 -5 0 8 -3.15117 32.2157 2
 -5 0 7 31218.8 522.593 2
 -5 0 6 -22.9832 31.5127 2
 -5 0 5 3025.99 155.948 2
 -5 0 4 27.7097 27.0848 2
 -5 0 4 -22.6761 36.5365 16
 -5 0 3 14147.9 321.246 16
 -5 0 3 13969.3 322.7 2
 -5 0 2 -5.29729 30.4491 16
 -5 0 1 14059.6 316.171 16
 -5 0 0 59.87 37.6938 16
 -5 0 -1 866.291 83.464 16
 -5 0 -2 61.2201 38.4977 16
 -5 0 -3 34099.1 505.958 16
 -5 0 -4 65.9262 43.8161 16
 -5 0 -5 3817.77 174.938 16
 -5 0 -6 -4.30598 31.8632 16
 -5 0 -7 95.787 40.1064 16
 -5 0 -8 22.9969 32.1259 16
 -5 0 -9 184.701 48.6351 16
 -5 0 -10 56.5129 46.5995 16
 -5 0 -11 51.654 46.0057 16
 -5 0 -12 -21.9231 41.5101 16
 -5 0 -13 1210.47 53.5067 13
 5 0 14 4.64898 34.5255 2
 -5 0 -14 27.9955 18.6847 13
 -5 0 -15 5803.36 110.886 13
 -5 0 -16 7.04163 19.3931 11
 -5 0 -16 20.1946 17.8412 13
 -5 0 -17 1401.34 61.6039 11
 -5 0 -17 1307.5 50.727 13
 -5 0 -18 4.4843 17.3435 11
 -5 0 -18 -14.8799 14.6069 13
 -5 0 -19 28.2707 15.5688 11
 -5 0 -19 46.9844 13.3847 13
 5 -1 -24 29.7824 16.579 14
 5 1 -24 -5.06578 15.2264 14
 5 -1 -23 38.9858 20.1925 14
 5 1 -23 76.0434 21.6217 14
 5 -1 -22 209.814 30.1588 14
 5 1 -22 180.242 28.2437 14
 5 -1 -21 540.569 44.0755 14
 5 1 -21 639.351 47.2887 14
 5 -1 -20 1785.31 78.2307 14
 5 1 -20 1849.31 79.6149 14
 5 -1 -19 308.617 38.7216 14
 5 1 -19 336.51 37.8756 14
 -5 -1 18 462.861 102.095 2
 5 1 -18 510.332 45.9501 14
 5 -1 -18 482.879 43.8744 14
 5 -1 -17 3987.69 115.679 14
 5 1 -17 4016.67 114.706 14
 -5 -1 17 4227.05 279.244 2
 -5 1 16 5095.62 276.087 2
 -5 -1 16 4567.42 286.99 2
 -5 1 15 2456.83 187.48 2
 -5 -1 15 2340.82 200.054 2
 -5 1 14 56.5335 46.6592 2
 -5 -1 14 23.7749 53.4727 2
 -5 1 13 186.423 52.9809 2
 -5 -1 13 216.366 73.5272 2
 -5 1 12 204.983 59.9278 2
 -5 -1 12 233.085 77.488 2
 -5 1 11 3606.9 198.795 2
 -5 -1 11 3848.61 220.896 2
 -5 1 10 968.929 101.93 2
 -5 -1 10 978.523 113.392 2
 -5 1 9 384.192 65.5902 2
 -5 -1 9 338.616 71.5018 2
 -5 1 8 22071.8 442.573 2
 -5 -1 8 22045.3 468.371 2
 -5 1 8 21958 990.971 1
 -5 1 7 1841.96 282.438 1
 -5 1 7 1820.08 124.992 2
 -5 -1 7 1522.7 122.597 2
 -5 1 6 12822.9 321.285 2
 -5 -1 6 12554.7 331.845 2
 -5 1 5 641.791 75.2665 2
 -5 -1 5 513.379 70.5962 2
 -5 1 5 571.184 67.9613 16
 -5 1 4 -26.2189 33.4284 2
 -5 -1 4 1.59498 29.6111 2
 -5 1 4 57.3738 35.7474 16
 -5 1 4 -61.5884 68.8198 1
 -5 1 3 1734.83 114.041 2
 -5 -1 3 1436.87 107.817 2
 -5 1 3 1699.52 107.741 16
 -5 -1 3 1501.68 113.329 16
 -5 -1 2 40643.7 550.39 2
 -5 -1 2 40276.8 561.731 16
 -5 1 2 41011.1 515.291 16
 -5 -1 1 28842.8 471.677 16
 -5 1 1 29567.7 441.217 16
 -5 -1 1 30076.2 990.759 15
 -5 -1 0 47862.9 602.813 16
 -5 -1 0 46626.6 1275.08 15
 -5 1 0 47042.5 560.978 16
 -5 1 -1 228.924 45.2457 16
 -5 -1 -1 134.442 41.477 16
 -5 -1 -1 313.221 129.188 15
 -5 -1 -2 33.4565 34.2894 16
 -5 1 -2 -19.7284 36.3904 16
 -5 -1 -2 16.0099 78.1356 15
 -5 1 -3 1970.38 121.316 16
 -5 -1 -3 1947.56 125.382 16
 -5 1 -4 5847.01 210.584 16
 -5 -1 -4 5650.3 211.296 16
 -5 1 -5 32.1633 33.1958 16
 -5 -1 -5 55.2473 37.4132 16
 -5 1 -6 12670.6 330.723 16
 -5 -1 -6 12410.4 319.892 16
 -5 -1 -7 4949.72 206.888 16
 -5 1 -7 5099.09 217.764 16
 -5 1 -8 1133.77 109.964 16
 -5 -1 -8 1290.14 109.843 16
 -5 1 -9 3870.88 201.519 16
 -5 1 -10 897.223 102.635 16
 -5 1 -11 4358.1 226.144 16
 -5 -1 -12 591.809 37.6156 12
 -5 1 -12 585.87 89.2846 16
 -5 -1 -12 526.301 35.9365 13
 -5 1 -12 592.892 39.3595 13
 -5 1 -13 1866.82 148.199 16
 -5 1 -13 2005.31 68.4462 13
 -5 -1 -13 2020.64 65.1744 13
 -5 1 -14 179.492 25.1112 13
 -5 -1 -14 179.674 23.6078 13
 -5 1 -15 1152.69 51.2823 13
 -5 1 -16 231.47 27.8712 13
 -5 1 -17 976.358 53.4458 11
 -5 1 -17 954.971 44.248 13
 -5 1 -18 157.127 25.1602 11
 -5 1 -18 137.482 19.6474 13
 -5 1 -19 209.232 24.6736 11
 -5 1 -19 182.316 19.4521 13
 5 -2 -23 62.1074 19.2511 14
 5 2 -23 32.0332 16.2847 14
 5 -2 -22 14.5316 18.2998 14
 5 2 -22 -11.3384 18.6606 14
 5 -2 -21 486.606 41.5256 14
 5 2 -21 462.685 39.6902 14
 5 -2 -20 7.56465 23.0576 14
 5 2 -20 -10.7272 20.658 14
 5 -2 -19 18.6243 21.0483 14
 5 2 -19 22.7347 21.7162 14
 5 -2 -18 239.873 34.5368 14
 5 2 -18 220.225 31.3071 14
 5 -2 -17 914.359 57.4522 14
 5 2 -17 985.38 56.5436 14
 5 -2 -16 2521.04 181.716 5
 -5 -2 16 2148.3 201.333 2
 5 -2 -16 2494.08 89.6854 14
 -5 -2 15 377.931 95.4211 2
 5 -2 -15 544.635 90.8326 5
 -5 -2 14 -11.8689 63.5853 2
 -5 -2 13 152.329 65.7659 2
 -5 -2 12 642.055 103.788 2
 -5 -2 11 157.084 61.4882 2
 -5 -2 10 13424.7 405.742 2
 -5 -2 9 8697.03 314.252 2
 -5 -2 8 3147.08 184.154 2
 -5 2 7 4454.07 189.561 2
 -5 -2 7 4758.37 217.86 2
 -5 2 6 4391.25 185.038 2
 -5 -2 6 4275.78 199.862 2
 -5 2 6 4559.2 453.302 1
 -5 2 5 10921.9 287.175 2
 -5 2 5 11653.7 707.293 1
 -5 -2 5 11285.6 312.404 2
 -5 -2 4 578.318 72.0345 2
 -5 -2 4 804.456 90.2521 6
 -5 2 4 423.577 164.203 1
 -5 2 3 11071.4 677.552 1
 -5 -2 3 10766 292.619 2
 -5 -2 3 10942.2 665.732 15
 -5 -2 2 4076.44 179.054 2
 -5 2 2 3744.32 152.795 16
 -5 -2 2 3796.9 182.756 16
 -5 -2 2 3862.64 402.949 15
 -5 -2 1 11225.3 308.679 16
 -5 -2 1 11508.6 692.798 15
 -5 2 1 11233.2 265.199 16
 -5 -2 0 19437 402.705 16
 -5 -2 0 18903.4 893.219 15
 -5 2 0 19334.8 352.464 16
 -5 2 -1 42570.4 532.142 16
 -5 -2 -1 41080.2 583.564 16
 -5 -2 -1 42828.7 1374.18 15
 -5 -2 -2 42.4605 35.1998 16
 -5 2 -2 18.2278 25.4611 16
 -5 2 -3 8043.53 245.447 16
 -5 -2 -3 7633.61 248.113 16
 -5 -2 -4 1163.01 100.822 16
 -5 2 -4 1126.6 98.3086 16
 -5 2 -5 60.5196 41.8377 16
 -5 2 -6 32.1639 36.6434 16
 -5 2 -7 9.71792 34.4437 16
 -5 2 -8 699.123 92.8984 16
 -5 2 -9 2706.34 174.354 16
 -5 2 -10 5553.39 250.837 16
 -5 2 -11 1341.8 128.882 16
 -5 -2 -12 903.141 48.5414 12
 -5 2 -12 1010.98 111.844 16
 -5 2 -12 879.051 46.3204 13
 -5 -2 -13 553.467 39.01 12
 5 -2 13 459.449 79.6327 2
 -5 2 -13 517.732 81.6391 16
 -5 2 -13 596.646 39.3541 13
 -5 -2 -14 177.377 24.5693 12
 -5 2 -14 211.92 26.3051 13
 -5 -2 -15 1217.18 52.5999 12
 -5 2 -15 1197.3 52.6228 13
 -5 -2 -16 217.745 25.4411 12
 -5 2 -16 244.49 27.3112 13
 -5 2 -17 -7.4818 16.1606 13
 -5 2 -18 80.2741 22.6207 11
 -5 2 -18 39.494 14.8201 13
 -5 2 -19 107.161 20.9874 11
 5 -3 -22 77.6406 19.9502 14
 5 -3 -21 162.773 24.0437 8
 5 -3 -21 180.739 27.275 14
 5 -3 -20 82.8215 22.2767 8
 5 -3 -20 100.035 25.4687 14
 5 -3 -19 1213.63 61.4132 14
 5 -3 -19 1141.58 58.6531 8
 5 -3 -18 549.328 45.3037 8
 5 -3 -18 479.872 41.1301 14
 -5 -3 17 59.2279 60.5961 2
 5 -3 -17 14.2651 44.1383 5
 5 -3 -17 36.4011 20.2187 8
 5 -3 -17 38.1972 21.646 14
 -5 -3 16 50.0137 52.16 2
 5 -3 -16 -9.66427 20.3229 8
 5 -3 -16 22.7836 19.0188 14
 -5 -3 15 623.203 46.3165 10
 -5 -3 15 484.303 102.07 2
 5 -3 -15 713.424 48.5656 8
 5 -3 -15 520.439 94.3886 5
 5 -3 -15 572.823 44.5787 14
 -5 -3 14 1289.14 158.12 2
 5 -3 -14 1528 148.605 5
 -5 -3 13 11262.1 433.558 2
 5 -3 -13 11336.4 383.964 5
 -5 -3 12 5498.67 289.161 2
 5 -3 -12 5653.18 266.457 5
 -5 -3 11 489.789 86.274 2
 -5 -3 10 246.114 70.0775 2
 -5 -3 9 3014.56 194.757 2
 -5 -3 8 716.983 95.4047 2
 -5 -3 7 3005.44 175.933 2
 -5 -3 6 4389.64 229.467 6
 -5 -3 5 264.896 61.9211 6
 -5 -3 4 3045.47 182.914 6
 -5 -3 3 26571.2 523.154 6
 -5 -3 2 12650.1 353.762 6
 -5 -3 1 15992.9 391.202 6
 -5 -3 1 15664.9 382.536 16
 -5 -3 0 61489.3 755.409 6
 -5 -3 0 61111.9 743.823 16
 -5 -3 -1 29566.2 525.315 6
 -5 -3 -1 30590.2 517.415 16
 -5 3 -2 165.348 42.0782 16
 -5 3 -3 7501.48 242.886 16
 -5 3 -4 7568.06 252.523 16
 -5 3 -5 1407.62 116.108 16
 -5 3 -6 83.3141 43.696 16
 -5 3 -7 2858.83 172.942 16
 -5 3 -8 560.573 83.5376 16
 -5 3 -9 6688.27 271.674 16
 -5 3 -10 1095.1 115.338 16
 -5 -3 -11 1445.53 61.0449 12
 -5 3 -11 1516.61 134.747 16
 -5 3 -11 1505.41 56.952 13
 -5 -3 -12 520.394 39.5334 12
 5 -3 12 499.973 85.7123 2
 -5 3 -12 530.617 36.3015 13
 -5 -3 -13 254.071 29.387 12
 -5 3 -13 227.417 25.3422 13
 -5 -3 -14 891.333 50.0053 12
 -5 3 -14 926.506 45.5381 13
 -5 -3 -15 10.5501 18.1511 12
 -5 3 -15 4.00987 15.3999 13
 -5 -3 -16 468.367 33.3473 12
 -5 3 -16 373.201 32.3445 14
 -5 3 -16 448.451 31.7092 13
 -5 3 -17 87.0567 18.3052 14
 -5 3 -17 52.8096 15.7239 13
 -5 3 -18 29.6678 17.4389 11
 -5 3 -18 35.7699 14.1693 14
 5 -4 -22 12.3154 14.5691 8
 5 -4 -21 51.1349 18.0765 8
 5 -4 -20 390.7 34.2516 8
 5 -4 -19 83.6094 23.2354 8
 5 -4 -18 493.538 42.0156 8
 5 -4 -18 413.546 36.3041 14
 5 -4 -17 34.0564 19.7937 8
 5 -4 -17 44.1359 19.0637 14
 5 -4 -16 35.6968 22.7951 8
 5 -4 -16 47.0193 18.4433 14
 -5 -4 15 -16.9616 21.816 10
 5 -4 -15 -5.31772 21.1353 8
 5 -4 -15 -3.80025 17.9065 14
 -5 -4 14 53.8187 21.7157 10
 5 -4 -14 53.8229 54.6559 5
 5 -4 -14 71.2634 22.4567 8
 5 -4 -14 94.9248 21.9479 14
 5 -4 -13 77.5752 50.3318 5
 5 -4 -12 382.494 82.388 5
 5 -4 -11 31.1619 43.4804 5
 5 -4 -10 1404.52 137.609 5
 5 -4 -9 7599.55 307.86 5
 -5 -4 8 708.682 112.926 6
 5 -4 -8 890.523 110.059 5
 -5 -4 7 20.4154 45.766 6
 -5 -4 6 97.7309 64.1827 6
 -5 -4 5 2843.69 200.354 6
 -5 -4 4 10527.4 370.763 6
 -5 -4 3 1337.15 132.415 6
 -5 -4 2 1128.43 122.35 6
 -5 -4 1 12.3084 37.6888 6
 -5 -4 0 1155.67 121.792 6
 -5 -4 -1 3.17426 41.2737 6
 -5 -4 -2 1990.95 155.116 6
 -5 -4 -3 399.708 77.2859 6
 -5 -4 -4 11009.3 361.354 6
 -5 -4 -5 12.7768 36.774 6
 -5 4 -5 77.2369 35.8188 16
 -5 -4 -6 90.2441 42.9986 6
 -5 4 -6 181.851 50.9022 16
 -5 4 -7 1255.48 117.189 16
 -5 4 -8 -5.70857 41.3516 16
 -5 -4 -9 8.36351 16.6082 12
 -5 4 -9 69.1821 46.4139 16
 -5 -4 -10 13294.4 181.708 12
 -5 -4 -11 1.30659 17.8621 12
 -5 -4 -12 10.4067 17.8112 12
 -5 -4 -13 1420.16 60.0773 12
 -5 4 -13 1379.38 51.7739 13
 -5 -4 -14 219.169 28.1501 12
 -5 4 -14 175.081 20.5765 13
 -5 -4 -15 922.918 46.5085 12
 -5 4 -15 953.663 41.8043 13
 -5 -4 -16 403.318 30.0075 12
 -5 4 -16 358.457 30.8184 14
 -5 4 -16 338.186 24.7359 13
 -5 4 -17 191.431 22.6132 14
 -5 4 -18 33.2195 16.5104 11
 5 -5 -21 159.122 21.5352 8
 5 -5 -20 225.956 25.776 8
 5 -5 -19 56.7128 20.7861 8
 5 -5 -18 49.8806 21.2528 8
 5 -5 -17 3.88811 19.703 8
 5 -5 -16 1272.78 63.4623 8
 -5 -5 16 1232.39 60.7546 10
 -5 -5 15 191.851 32.0726 10
 5 -5 -15 240.04 34.7821 8
 5 -5 -14 6413.16 140.212 8
 -5 -5 14 6451.86 137.834 10
 5 -5 -14 6422.49 314.062 5
 5 -5 -13 489.453 43.2246 8
 -5 -5 13 460.902 41.2143 10
 -5 -5 13 527.422 114.212 6
 5 -5 -13 465.959 92.5961 5
 5 -5 -12 10134.4 388.136 5
 -5 -5 12 9935.08 435.557 6
 -5 -5 12 9749.75 170.526 10
 5 -5 -12 9847.03 173.248 8
 -5 -5 11 142.972 26.7884 10
 -5 -5 11 158.698 77.3083 6
 5 -5 -11 62.4846 57.1611 5
 5 -5 -11 126.923 27.5121 8
 -5 -5 10 5022.99 305.841 6
 5 -5 -10 4281.66 244.083 5
 -5 -5 9 129.451 60.0648 6
 5 -5 -9 168.414 62.822 5
 -5 -5 8 13615.1 489.813 6
 5 -5 -8 13830.2 415.547 5
 5 -5 -7 2142.84 159.87 5
 -5 -5 7 2170.06 196.851 6
 -5 -5 6 2362.53 199.183 6
 -5 -5 5 1199.55 143.911 6
 -5 -5 4 4379.55 259.634 6
 -5 -5 3 2806.64 209.512 6
 -5 -5 2 158.87 68.4804 6
 -5 -5 1 942.724 119.574 6
 -5 -5 0 3186.84 213.203 6
 -5 -5 -1 -19.8516 42.9684 6
 -5 -5 -2 90.2289 48.0039 6
 -5 -5 -3 1662.26 155.405 6
 -5 -5 -4 2351.53 184.592 6
 -5 -5 -5 213.338 68.3818 6
 -5 -5 -6 2319.58 188.177 6
 -5 -5 -7 184.924 26.8985 12
 -5 -5 -7 208.279 61.8548 6
 5 -5 7 152.362 24.3534 7
 -5 -5 -8 1062.93 53.1597 12
 -5 -5 -8 1075.33 128.658 6
 5 -5 8 1124.39 55.4828 7
 -5 -5 -9 1401.12 152.109 6
 -5 -5 -9 1281.49 58.4323 12
 5 -5 9 1332.53 59.7569 7
 -5 -5 -10 156.73 25.5124 12
 5 -5 10 178.478 26.2569 7
 -5 -5 -11 28.1327 17.4666 12
 -5 -5 -12 73.2422 20.7378 12
 -5 -5 -13 171.402 23.9226 12
 -5 -5 -14 861.555 42.714 12
 -5 -5 -15 213.45 23.2279 12
 -5 5 -16 71.7318 17.9825 14
 5 -6 -19 -42.6614 18.3167 8
 5 -6 -18 25.9303 18.7129 8
 5 -6 -17 199.784 28.5519 8
 -5 -6 16 29.142 22.5982 10
 5 -6 -16 22.6925 21.6564 8
 -5 -6 15 194.474 29.3637 10
 5 -6 -15 204.619 30.9876 8
 -5 -6 14 664.463 46.2154 10
 5 -6 -14 615.865 47.0501 8
 -5 -6 13 32.1266 23.0364 10
 5 -6 -13 25.896 20.8972 8
 -5 -6 12 1046.93 58.7497 10
 5 -6 -12 951.311 56.4782 8
 -5 -6 11 64.9233 21.2253 10
 -5 -6 11 55.3417 58.04 6
 5 -6 -11 111.634 56.8854 5
 5 -6 -11 77.9706 23.6863 8
 -5 -6 10 2522.83 219.439 6
 -5 -6 10 2655.26 90.564 10
 5 -6 -10 2821.11 205.088 5
 5 -6 -10 2788.54 92.8764 8
 -5 -6 9 188.774 29.5722 10
 5 -6 -9 205.096 29.5957 8
 -5 -6 8 249.287 30.9455 10
 5 -6 -8 272.164 31.7079 8
 -5 -6 7 8742.12 399.19 6
 5 -6 -7 8644.27 160.867 8
 -5 -6 6 78.2079 66.6599 6
 -5 -6 5 1994.68 191.933 6
 -5 -6 4 6431.61 331.202 6
 -5 -6 3 4004.17 260.54 6
 -5 -6 2 1597.46 161.641 6
 -5 -6 1 947.874 127.516 6
 -5 -6 0 -36.1457 54.4403 6
 -5 -6 -1 1313.41 150.258 6
 -5 -6 -2 96.5812 52.962 6
 5 -6 2 49.9815 19.9006 7
 5 -6 3 395.386 36.993 14
 5 -6 3 385.005 35.6027 7
 -5 -6 -4 127.016 53.1572 6
 5 -6 4 174.193 27.5793 14
 5 -6 4 193.756 28.6791 7
 -5 -6 -5 1676.01 167.563 6
 5 -6 5 1811.85 71.5453 7
 -5 -6 -6 473.745 90.2431 6
 5 -6 6 369.595 37.3042 7
 5 -6 7 4274.21 106.65 7
 5 -6 8 676.526 44.6006 7
 -5 -6 -9 2067.48 68.3163 12
 5 -6 9 2272.25 76.3459 7
 -5 -6 -10 56.2846 18.3743 12
 5 -6 10 91.4608 21.9245 7
 -5 -6 -11 4.76982 15.8685 12
 5 -6 11 -5.49987 16.5164 7
 -5 -6 -12 223.304 23.795 12
 5 -6 12 237.059 26.4483 7
 -5 -6 -13 237.313 22.8975 12
 -5 -6 -14 -2.77173 12.1154 12
 -5 6 -15 12.9437 13.4931 14
 5 -7 -17 3.5798 14.6394 8
 -5 -7 16 192.35 23.0979 10
 5 -7 -16 160.03 23.6094 8
 -5 -7 15 84.3191 19.8106 10
 5 -7 -15 120.672 23.5769 8
 -5 -7 14 -17.0045 20.204 10
 5 -7 -14 12.5572 19.0421 8
 -5 -7 13 638.168 43.5722 10
 5 -7 -13 709.402 46.4744 8
 -5 -7 12 -8.92915 20.2828 10
 5 -7 -12 -10.3006 20.671 8
 -5 -7 11 113.622 24.3949 10
 5 -7 -11 99.4348 24.9667 8
 -5 -7 10 584.541 42.4467 10
 5 -7 -10 576.916 44.6247 8
 -5 -7 9 222.872 30.9928 10
 5 -7 -9 149.271 27.5694 8
 -5 -7 8 229.816 29.8309 10
 5 -7 -8 271.66 34.2433 8
 5 -7 -7 102.069 28.2641 8
 -5 -7 6 148.212 67.8649 6
 5 -7 -6 111.712 27.1461 8
 5 -7 -5 1699.89 75.0803 8
 -5 -7 5 1535.52 167.611 6
 5 -7 -4 1707.23 73.7508 8
 -5 -7 4 1737.59 175.505 6
 5 -7 -4 1747.5 67.3975 7
 -5 -7 3 715.005 117.343 6
 5 -7 -3 597.638 45.3607 8
 5 -7 -3 665.607 43.3583 7
 5 -7 -2 822.677 51.9891 8
 -5 -7 2 923.288 131.407 6
 5 -7 -2 863.189 49.3727 7
 -5 -7 1 1394.8 153.673 6
 5 -7 -1 1313.93 60.9646 10
 5 -7 -1 1383.36 61.4947 7
 -5 -7 0 3892.06 256.854 6
 5 -7 0 3652.71 97.327 10
 5 -7 0 3571.84 98.5276 7
 -5 -7 -1 1852.6 178.955 6
 5 -7 1 1899.36 72.7677 7
 5 -7 2 1202.08 58.8594 7
 5 -7 3 23.919 20.4407 7
 5 -7 4 145.992 24.7692 7
 5 -7 5 1397.96 61.9275 7
 5 -7 6 429.056 39.7095 7
 5 -7 7 7.45159 19.3766 7
 5 -7 8 26.0341 19.383 7
 5 -7 9 5.12928 17.5866 7
 5 -7 10 60.6803 19.94 7
 5 -7 11 400.163 30.3646 7
 5 -7 12 0.23354 12.6887 7
 -5 -8 14 106.822 17.4534 10
 5 -8 -14 87.4608 15.1759 10
 5 -8 -14 137.421 20.0439 8
 -5 -8 13 63.7622 17.2918 10
 5 -8 -13 81.3105 18.8119 8
 -5 -8 12 315.316 28.4047 10
 5 -8 -12 342.975 30.4018 8
 -5 -8 11 718.427 42.0452 10
 5 -8 -11 722.728 42.9314 8
 -5 -8 10 195.831 26.7518 10
 5 -8 -10 203.158 27.4616 8
 -5 -8 9 914.766 48.9732 10
 5 -8 -9 778.368 47.2152 8
 -5 -8 8 4.29641 17.732 10
 5 -8 -8 47.1972 20.26 8
 5 -8 -7 343.849 34.2561 8
 5 -8 -6 125.036 25.6683 8
 5 -8 -5 469.151 38.5907 8
 5 -8 -5 466.503 38.0117 10
 5 -8 -4 287.137 33.5669 10
 5 -8 -4 236.254 30.6393 8
 5 -8 -3 35.2987 19.4465 10
 5 -8 -2 140.567 25.7963 10
 5 -8 -2 103.004 20.9462 7
 5 -8 -1 755.121 46.0682 10
 5 -8 -1 716.92 43.0187 7
 5 -8 0 528.221 38.5125 10
 5 -8 0 548.507 39.2342 7
 5 -8 1 18.9984 17.4675 7
 5 -8 2 -2.53645 17.0433 7
 5 -8 3 1284.46 57.0308 7
 5 -8 4 30.3911 18.9504 7
 5 -8 5 841.623 46.2795 7
 5 -8 6 160.381 25.0776 7
 5 -8 7 10.8387 16.2795 7
 5 -8 8 0.07644 15.534 7
 5 -8 9 409.233 29.3097 7
 5 -8 10 236.161 21.6667 7
 -5 -9 10 438.186 27.2838 10
 5 -9 -10 431.612 28.1605 10
 -5 -9 9 645.495 33.1837 10
 5 -9 -9 644.047 35.3863 10
 5 -9 -9 641.309 33.0348 8
 5 -9 -8 94.4504 19.7644 10
 5 -9 -7 628.347 37.2778 10
 5 -9 -6 167.694 23.4706 10
 5 -9 -5 37.5343 17.8125 10
 5 -9 -4 16.93 16.9136 10
 5 -9 -3 96.3361 20.4458 10
 5 -9 -2 -0.30137 16.2383 10
 5 -9 -1 8.22625 14.8191 10
 5 -9 0 57.3588 16.9843 10
 5 -9 1 715.756 36.3473 10
 5 -9 1 725.75 36.7165 7
 5 -9 2 14.6489 13.6612 7
 5 -9 3 142.685 19.7279 7
 5 -9 4 19.3346 14.5194 7
 5 -9 5 167.403 20.4428 7
 5 -9 6 95.8795 16.6041 7
 6 0 -23 -10.1972 16.792 14
 6 0 -22 292.711 32.5047 14
 6 0 -21 27.7825 21.5902 14
 6 0 -20 203.633 30.5427 14
 6 0 -19 4.58951 24.3069 14
 6 0 -18 6095 141.327 14
 -6 0 17 97.2876 68.422 2
 6 0 -17 14.0833 25.1183 14
 -6 0 16 2572.62 212.587 2
 6 0 -16 2623.86 93.2127 14
 -6 0 15 19.4881 52.4798 2
 -6 0 14 4481.2 271.446 2
 -6 0 13 -35.5459 60.9781 2
 -6 0 12 1451.83 150.216 2
 -6 0 11 36.0655 49.4454 2
 -6 0 10 930.331 115.923 2
 -6 0 9 -49.7697 46.9025 2
 -6 0 8 25208.4 533.785 2
 -6 0 7 -24.0661 41.0533 2
 -6 0 7 -5.25548 37.8333 16
 -6 0 6 11691.3 347.918 2
 -6 0 6 11294.8 331.664 16
 -6 0 5 -46.6297 41.4212 2
 -6 0 5 -10.1264 32.3414 16
 -6 0 4 6411.38 250.262 2
 -6 0 4 6645.57 247.813 16
 -6 0 3 -8.47946 34.2753 16
 -6 0 2 905.03 94.472 16
 -6 0 1 -24.7455 33.127 16
 -6 0 0 -4.63103 34.6975 16
 -6 0 -1 31.2719 37.2227 16
 -6 0 -2 5210.17 222.176 16
 -6 0 -3 57.0534 43.6697 16
 -6 0 -4 8419.8 283.072 16
 -6 0 -5 4.10984 40.7854 16
 -6 0 -6 7456.79 275.868 16
 -6 0 -7 26.5096 36.9517 16
 -6 0 -8 3375.64 194.318 16
 -6 0 -9 -7.03812 35.8797 16
 -6 0 -10 1432.42 131.38 16
 -6 0 -10 1485.88 58.0791 13
 -6 0 -11 -46.3564 45.3316 16
 -6 0 -11 -14.3731 16.5033 13
 -6 0 -12 -19.1896 15.1086 13
 -6 0 -13 -39.5745 19.8748 13
 -6 0 -14 297.003 29.0843 13
 -6 0 -15 4.22567 14.4451 13
 -6 0 -16 1441.54 50.4032 13
 -6 0 -17 -4.46975 11.7213 13
 -6 0 -18 6.688 10.4863 13
 6 -1 -23 194.814 25.8819 14
 6 1 -23 186.131 23.0652 14
 6 -1 -22 152.007 26.8421 14
 6 1 -22 100.242 22.4978 14
 6 -1 -21 3.02921 22.8166 14
 6 1 -21 -30.8369 21.462 14
 6 -1 -20 124.352 28.18 14
 6 1 -20 173.319 30.1252 14
 6 -1 -19 19.8314 24.1906 14
 6 1 -19 21.2367 23.5607 14
 6 -1 -18 3282.36 106.451 14
 6 1 -18 3191.09 101.645 14
 6 -1 -17 233.201 36.2071 14
 6 1 -17 236.576 35.0494 14
 -6 1 16 30.9293 57.6876 2
 -6 -1 16 84.7099 64.3762 2
 6 -1 -16 13.3312 22.1281 14
 6 1 -16 32.6604 20.5617 14
 -6 1 15 1972.06 178.082 2
 -6 -1 15 1773.47 185.072 2
 -6 1 14 1242.3 137.216 2
 -6 -1 14 1684.82 181.079 2
 -6 1 13 1952.12 167.766 2
 -6 -1 13 1646.09 173.976 2
 -6 1 12 2484.53 184.105 2
 -6 -1 12 2635.26 206.557 2
 -6 1 11 77.1459 51.2641 2
 -6 -1 11 -41.3803 65.7042 2
 -6 1 10 2350.94 169.363 2
 -6 -1 10 2142.05 177.761 2
 -6 -1 9 721.84 108.713 2
 -6 1 9 962.353 108.619 2
 -6 1 8 1453.78 127.836 2
 -6 -1 8 1477.87 136.545 2
 -6 -1 7 921.205 108.735 2
 -6 1 7 979.566 101.023 2
 -6 1 6 2299.62 152.937 2
 -6 -1 6 2360.52 162.442 2
 -6 1 5 6378.6 251.837 2
 -6 -1 5 6552.87 260.308 2
 -6 1 5 6507.32 233.168 16
 -6 -1 5 6888.14 269.481 16
 -6 -1 4 1393.39 122.961 2
 -6 1 4 1425.6 110.79 16
 -6 -1 4 1660.6 132.601 16
 -6 1 3 192.775 47.0976 16
 -6 -1 3 150.831 50.9463 16
 -6 -1 2 1733.48 134.28 16
 -6 1 2 1795.51 123.667 16
 -6 1 1 -2.21652 31.9716 16
 -6 -1 1 -1.82916 40.5004 16
 -6 1 0 1937.67 130.518 16
 -6 -1 0 1832.69 133.899 16
 -6 -1 -1 468.397 70.0532 16
 -6 1 -1 402.543 69.2396 16
 -6 1 -2 7797.45 263.032 16
 -6 -1 -2 7327.84 265.102 16
 -6 1 -3 11.9508 32.5032 16
 -6 -1 -3 9.46881 32.0445 16
 -6 -1 -4 2675.92 163.735 16
 -6 1 -4 2934.04 166.61 16
 -6 1 -5 -17.0508 36.2064 16
 -6 -1 -5 -13.041 30.9261 16
 -6 1 -6 2210.02 156.521 16
 -6 -1 -6 2370.67 156.215 16
 -6 1 -7 52.2235 48.3443 16
 -6 -1 -7 47.14 32.9486 16
 -6 1 -8 841.451 102.828 16
 -6 -1 -8 903.904 101.183 16
 -6 1 -9 1571.2 142.68 16
 -6 1 -10 69.5525 18.1127 13
 -6 -1 -10 27.8102 15.2655 13
 -6 1 -11 65.6979 44.3627 16
 -6 1 -11 76.5331 21.9644 13
 -6 -1 -11 6.2712 14.0169 13
 -6 1 -12 2481.81 170.535 16
 -6 1 -12 2581.21 76.869 13
 -6 -1 -12 2767.67 76.4836 13
 -6 1 -13 71.8729 19.6892 13
 -6 -1 -13 59.2843 16.844 13
 -6 1 -14 1677.48 60.8208 13
 -6 -1 -14 1789.78 59.7421 13
 -6 -1 -15 214.444 23.6679 13
 -6 1 -15 196.93 24.9325 13
 -6 1 -16 506.212 38.3872 11
 -6 1 -16 507.431 32.774 13
 -6 1 -17 202.857 24.2273 11
 -6 1 -17 156.231 19.9336 13
 -6 1 -18 27.7391 14.4881 11
 -6 1 -18 5.5601 11.7063 13
 6 -2 -23 321.322 27.4785 14
 6 -2 -22 243.27 27.9763 14
 6 -2 -21 50.8417 23.4111 14
 6 -2 -20 53.2427 23.9389 14
 6 -2 -19 692.399 50.8159 14
 6 -2 -18 1615.68 75.0199 14
 6 -2 -17 63.4073 24.4893 14
 6 -2 -16 6390.7 144.98 14
 -6 -2 16 5906.9 338.855 2
 6 -2 -16 6634.51 298.571 5
 6 -2 -15 2008.72 167.582 5
 6 -2 -15 1896.79 79.7432 14
 -6 -2 15 2121.94 208.508 2
 -6 -2 14 330.142 94.6778 2
 -6 -2 13 1990.8 192.533 2
 -6 -2 12 2352.92 198.179 2
 -6 -2 11 1344.06 146.94 2
 -6 -2 10 1457.78 151.009 2
 -6 -2 9 307.766 77.8735 2
 -6 2 8 2087.7 147.153 2
 -6 -2 8 1777.34 150.576 2
 -6 2 7 3191.21 177.99 2
 -6 -2 7 3147.15 192.508 2
 -6 -2 6 3342.49 193.164 2
 -6 -2 5 1512 130.672 2
 -6 -2 4 650.332 84.836 2
 -6 -2 4 326.618 69.5819 16
 -6 -2 3 88.419 45.7408 16
 -6 2 2 10991 290.676 16
 -6 -2 2 11137.9 344.017 16
 -6 2 1 10750.4 291.604 16
 -6 -2 1 10817.8 335.888 16
 -6 2 0 8.48556 25.3814 16
 -6 -2 0 54.7387 38.3086 16
 -6 -2 -1 3332.84 182.543 16
 -6 2 -1 3368.74 168.146 16
 -6 2 -2 1151.31 102.09 16
 -6 -2 -2 1117.51 110.538 16
 -6 2 -3 3311.59 175.342 16
 -6 -2 -3 2898.8 172.15 16
 -6 2 -4 2168.92 146.321 16
 -6 -2 -4 1986.84 142.705 16
 -6 -2 -5 231.454 53.6592 16
 -6 2 -5 499.738 77.7255 16
 -6 2 -6 864.479 102.375 16
 -6 2 -7 501.473 80.4601 16
 -6 2 -8 -20.8752 41.8609 16
 -6 2 -9 994.199 117.483 16
 -6 -2 -10 944.501 49.9827 12
 -6 2 -10 802.159 104.02 16
 -6 2 -10 950.949 48.033 13
 -6 -2 -11 3557.88 92.7385 12
 -6 2 -11 3387.05 201.584 16
 -6 2 -11 3772.17 91.4854 13
 -6 -2 -12 12.5389 17.354 12
 -6 2 -12 5.78882 16.4743 13
 -6 -2 -13 577.146 38.216 12
 -6 2 -13 589.143 38.4918 13
 -6 -2 -14 309.489 28.8757 12
 -6 2 -14 357.595 30.1886 13
 -6 -2 -15 191.683 22.9605 12
 -6 2 -15 176.756 25.1103 13
 -6 2 -16 -4.07915 14.143 13
 -6 2 -17 503.347 34.4796 11
 -6 2 -17 501.009 28.7959 13
 6 -3 -22 145.707 21.1099 14
 6 -3 -21 -4.66699 17.2748 14
 6 -3 -20 197.905 27.8101 14
 6 -3 -19 1725.57 70.2645 14
 6 -3 -18 15.1611 22.9647 14
 6 -3 -17 336.033 37.3216 14
 6 -3 -16 -31.2925 22.6415 14
 -6 -3 15 4089.36 278.701 2
 6 -3 -15 4074.26 242.81 5
 6 -3 -15 4237.26 115.927 14
 6 -3 -14 917.777 57.0582 14
 6 -3 -14 894.27 120.691 5
 -6 -3 13 2809.39 225.526 2
 6 -3 -13 3095 208.645 5
 -6 -3 12 3338.97 238.334 2
 -6 -3 11 3209.43 225.175 2
 -6 -3 10 1072.04 132.814 2
 -6 -3 9 2225.17 175.235 2
 -6 -3 8 584.362 93.0752 2
 -6 -3 8 656.197 106.358 6
 -6 -3 7 11091.9 390.212 6
 -6 -3 7 10609.8 356.696 2
 -6 -3 6 10340.6 367.763 6
 -6 -3 5 10978.6 368.804 6
 -6 -3 3 572.687 86.7981 16
 -6 -3 2 1891.16 150.205 16
 -6 -3 1 -14.5876 42.4407 16
 -6 -3 0 15329.9 408.68 16
 -6 -3 -1 13459.3 376.119 16
 -6 3 -2 953.067 97.1038 16
 -6 3 -3 91.2517 45.9263 16
 -6 3 -4 110.283 50.7331 16
 -6 3 -5 2850.01 174.633 16
 -6 3 -6 408.861 74.4819 16
 -6 3 -7 257.923 66.8313 16
 -6 -3 -8 1825.83 68.21 12
 -6 3 -8 1711.43 142.181 16
 -6 -3 -9 1907.12 70.3028 12
 -6 3 -9 1813.42 151.524 16
 -6 3 -9 1812.65 62.3302 13
 -6 -3 -10 913.571 50.5282 12
 -6 3 -10 806.888 102.679 16
 -6 3 -10 891.957 45.6239 13
 -6 -3 -11 1917.01 69.3471 12
 -6 3 -11 1889.47 63.4296 13
 -6 -3 -12 7.18452 17.832 12
 -6 3 -12 20.4006 17.8409 13
 -6 -3 -13 93.7875 22.0928 12
 -6 3 -13 132.6 20.7382 13
 -6 -3 -14 399.449 32.3521 12
 -6 3 -14 378.212 29.4663 13
 -6 -3 -15 45.9928 16.9718 12
 -6 3 -15 80.0126 19.4331 14
 -6 3 -15 65.0925 16.7012 13
 -6 3 -16 9.4021 12.9043 13
 -6 3 -17 144.004 16.5395 13
 6 -4 -21 82.4502 17.1066 14
 6 -4 -20 419.247 32.1755 14
 6 -4 -20 507.72 34.2781 8
 6 -4 -19 -23.7573 17.7664 8
 6 -4 -19 -12.5127 19.9371 14
 6 -4 -18 321.442 33.2483 14
 6 -4 -18 333.569 33.9342 8
 6 -4 -17 -2.58364 18.0413 8
 6 -4 -17 -15.4523 22.287 14
 6 -4 -16 80.0775 25.1904 8
 6 -4 -16 78.7468 21.7827 14
 6 -4 -15 1340.41 64.9007 14
 6 -4 -15 1316.39 64.9038 8
 -6 -4 14 39.0736 20.6593 10
 6 -4 -14 64.0668 19.7235 8
 6 -4 -14 57.6274 23.5013 14
 -6 -4 13 42.7279 20.6946 10
 6 -4 -13 54.5298 48.1687 5
 6 -4 -13 82.4378 24.0126 8
 6 -4 -13 91.4608 25.9081 14
 -6 -4 12 -27.7063 19.6491 10
 6 -4 -12 -0.65927 20.207 8
 6 -4 -12 -38.2634 50.1073 5
 6 -4 -12 -11.0626 23.856 14
 -6 -4 11 70.006 64.2502 6
 6 -4 -11 3.64079 47.4266 5
 -6 -4 10 4623.31 293.435 6
 6 -4 -10 4344.04 245.044 5
 -6 -4 9 480.713 106.711 6
 6 -4 -9 454.671 85.2482 5
 -6 -4 8 320.595 83.632 6
 -6 -4 7 3466.22 238.024 6
 -6 -4 6 5729.01 298.529 6
 -6 -4 5 295.322 77.8443 6
 -6 -4 4 853.27 112.986 6
 -6 -4 4 904.322 116.848 16
 -6 -4 3 1303.64 136.852 6
 -6 -4 3 1401.07 137.341 16
 -6 -4 2 364.621 75.4114 16
 -6 -4 2 362.986 67.8904 6
 -6 -4 1 1851.11 153.255 6
 -6 -4 0 18.3647 44.2444 6
 -6 -4 -6 270.558 29.4538 12
 -6 4 -6 204.459 59.1921 16
 -6 -4 -7 252.034 29.1671 12
 -6 4 -7 266.493 65.9155 16
 -6 -4 -8 2949.49 87.6373 12
 -6 4 -8 3096.55 184.768 16
 -6 -4 -9 2882.35 86.9936 12
 -6 4 -9 3128.14 187.428 16
 -6 -4 -10 118.731 25.5743 12
 -6 -4 -11 564.674 40.7573 12
 -6 -4 -12 -11.9567 19.5328 12
 -6 -4 -13 162.856 26.0955 12
 -6 4 -13 163.211 20.499 13
 -6 -4 -14 14.5146 16.5292 12
 -6 4 -14 -3.86928 12.4038 13
 -6 4 -15 483.22 31.7582 14
 -6 4 -15 454.62 26.0507 13
 -6 4 -16 250.52 21.9583 14
 6 -5 -20 -5.28055 14.022 8
 6 -5 -19 285.753 27.6661 8
 6 -5 -18 88.2913 21.9127 8
 6 -5 -17 63.8502 21.8327 8
 6 -5 -16 867.844 51.7439 8
 -6 -5 15 1033.89 57.1536 10
 6 -5 -15 1002.53 56.7639 8
 6 -5 -15 1115.21 55.5441 14
 -6 -5 14 94.9836 26.3652 10
 6 -5 -14 90.0152 25.3411 8
 6 -5 -14 66.5236 22.8152 14
 -6 -5 13 75.8783 26.4766 10
 6 -5 -13 51.8035 21.4479 8
 6 -5 -13 87.9935 23.2435 14
 -6 -5 12 1854.79 190.789 6
 -6 -5 12 1636.52 74.2005 10
 6 -5 -12 1680.95 159.772 5
 6 -5 -12 1710.04 74.5696 8
 6 -5 -12 1728.09 71.4189 14
 -6 -5 11 7.19125 18.3832 10
 6 -5 -11 43.0589 21.7709 8
 6 -5 -11 64.607 54.9286 5
 6 -5 -11 -6.7882 17.9971 14
 -6 -5 10 4838.96 304.815 6
 -6 -5 10 4686.93 118.856 10
 6 -5 -10 5079.91 267.914 5
 6 -5 -10 5153.9 121.38 14
 6 -5 -10 4923.84 122.764 8
 -6 -5 9 701.923 125.724 6
 6 -5 -9 707.429 48.4831 8
 6 -5 -9 769.652 106.119 5
 6 -5 -9 675.977 47.0046 14
 6 -5 -8 1491.59 140.285 5
 -6 -5 8 1484.73 168.401 6
 -6 -5 7 1770.56 183.173 6
 -6 -5 6 2068.37 189.099 6
 -6 -5 5 2258.39 199.702 6
 -6 -5 4 7.2587 49.2869 6
 -6 -5 3 4808.93 274.564 6
 -6 -5 2 1693.18 165.164 6
 -6 -5 1 198.268 68.8903 6
 -6 -5 0 237.75 68.4367 6
 -6 -5 -1 3592.72 229.975 6
 -6 -5 -2 3769.75 232.704 6
 -6 -5 -3 5310.87 115.402 12
 -6 -5 -3 5466.1 280.199 6
 6 -5 3 5565.89 126.715 14
 6 -5 3 5586.62 119.464 7
 -6 -5 -4 243.254 29.8691 12
 6 -5 4 239.264 30.3593 14
 6 -5 4 224.93 29.1131 7
 -6 -5 -5 -22.0674 19.5722 12
 6 -5 5 2.75081 20.9573 14
 6 -5 5 -18.6141 19.8635 7
 -6 -5 -6 825.28 48.0644 12
 6 -5 6 704.443 44.6876 7
 -6 -5 -7 1342.31 60.0387 12
 6 -5 7 1399.13 60.147 7
 -6 -5 -8 60.8307 19.1874 12
 -6 -5 -9 30.3609 17.8645 12
 -6 -5 -10 692.275 43.4879 12
 -6 -5 -11 646.557 40.7317 12
 -6 -5 -12 341.25 29.625 12
 -6 -5 -13 0.09116 14.4894 12
 -6 -5 -14 21.2262 14.1948 12
 -6 5 -15 129.374 17.5712 14
 6 -6 -18 141.689 21.2743 8
 6 -6 -17 58.2088 18.0325 8
 6 -6 -16 905.232 47.7281 8
 -6 -6 15 473.285 38.8369 10
 6 -6 -15 401.953 36.0334 8
 -6 -6 14 132.209 25.6421 10
 6 -6 -14 195.543 30.1764 8
 -6 -6 13 247.297 32.1901 10
 6 -6 -13 238.443 32.0842 8
 -6 -6 12 118.167 26.1717 10
 6 -6 -12 49.6775 23.7096 8
 -6 -6 11 1.08144 18.8279 10
 6 -6 -11 -17.0924 23.6818 8
 -6 -6 10 16.6468 17.4627 10
 6 -6 -10 -20.484 21.8269 8
 6 -6 -9 162.072 29.6881 8
 -6 -6 8 1050.28 146.039 6
 6 -6 -8 1082.3 60.895 8
 -6 -6 7 1158.85 149.667 6
 6 -6 -7 1218.94 65.4362 8
 6 -6 -7 1227.36 60.2475 14
 -6 -6 6 17.1823 44.8444 6
 6 -6 -6 14.7081 21.0347 8
 6 -6 -6 15.3013 17.241 14
 -6 -6 5 677.597 125.245 6
 6 -6 -5 644.633 48.9731 8
 6 -6 -5 699.479 45.8735 14
 -6 -6 4 165.127 66.2983 6
 6 -6 -4 170.894 29.2819 8
 6 -6 -4 144.884 27.359 14
 -6 -6 3 1520.13 164.531 6
 6 -6 -3 1358.71 66.3652 8
 6 -6 -3 1391.88 63.2676 14
 -6 -6 2 2064.09 190.014 6
 6 -6 -2 1970.83 79.8349 8
 6 -6 -2 2124.93 78.3901 14
 -6 -6 1 365.608 85.3457 6
 6 -6 -1 336.846 34.396 14
 -6 -6 0 8.02606 41.506 6
 6 -6 0 -7.54289 20.6042 14
 6 -6 0 3.94245 17.8593 7
 -6 -6 -1 94.6987 62.6208 6
 6 -6 1 71.1179 22.9331 14
 6 -6 1 65.2438 22.1679 7
 -6 -6 -2 1231.75 142.953 6
 6 -6 2 1237.65 61.8236 14
 6 -6 2 1174.96 59.1958 7
 6 -6 3 2913.34 91.9812 14
 6 -6 3 2802.05 88.0209 7
 6 -6 4 479 39.9402 7
 6 -6 5 22.0622 19.3972 7
 -6 -6 -6 3577.68 90.5701 12
 6 -6 6 3688.42 97.3495 7
 -6 -6 -7 -17.5885 16.8124 12
 6 -6 7 59.371 23.4204 7
 -6 -6 -8 5.29376 15.4155 12
 6 -6 8 -19.0902 17.0688 7
 -6 -6 -9 309.656 28.7782 12
 6 -6 9 327.849 30.4817 7
 -6 -6 -10 119.886 19.7379 12
 6 -6 10 81.1634 18.1935 7
 -6 -6 -11 35.6579 15.6027 12
 -6 -6 -12 277.198 22.8227 12
 -6 -6 -13 160.451 17.8308 12
 6 -7 -16 24.3936 15.4196 8
 6 -7 -15 240.735 26.4434 8
 -6 -7 14 88.2981 18.8228 10
 6 -7 -14 92.9249 20.4455 8
 -6 -7 13 43.0689 18.9147 10
 6 -7 -13 74.4706 22.9065 8
 -6 -7 12 138.043 23.2724 10
 6 -7 -12 204.18 29.4916 8
 -6 -7 11 578.441 39.9412 10
 6 -7 -11 643.732 45.6674 8
 -6 -7 10 6.83482 17.7603 10
 6 -7 -10 33.379 22.9972 8
 6 -7 -9 257.837 33.5236 8
 6 -7 -8 2064.91 78.9231 8
 6 -7 -7 1626.46 71.3336 8
 6 -7 -6 262.06 34.2846 8
 6 -7 -5 129.16 28.9601 8
 6 -7 -4 326.644 37.2352 8
 6 -7 -4 360.501 34.3395 7
 6 -7 -3 276.209 33.5475 8
 6 -7 -3 296.473 31.4164 7
 6 -7 -2 15.8097 18.3232 7
 6 -7 -1 440.97 37.595 7
 6 -7 0 186.298 27.2149 14
 6 -7 0 181.992 27.3707 7
 6 -7 1 1107.93 55.1707 14
 6 -7 1 1040.22 55.9798 7
 6 -7 2 984.159 53.875 7
 6 -7 3 1141.03 56.4105 7
 6 -7 4 205.271 29.0724 7
 6 -7 5 54.2001 21.5153 7
 6 -7 6 74.7969 23.0862 7
 6 -7 7 171.964 25.3149 7
 6 -7 8 2.89686 15.4092 7
 6 -7 9 75.6606 17.1528 7
 6 -7 10 27.1049 13.6145 7
 6 -8 -13 220.213 23.3605 8
 -6 -8 12 124.039 18.2602 10
 6 -8 -12 133.601 21.6644 8
 -6 -8 11 0.5218 14.9497 10
 6 -8 -11 -1.05398 16.0488 8
 6 -8 -10 184.37 24.4861 8
 6 -8 -9 8.0875 16.8394 8
 6 -8 -8 375.909 33.3333 8
 6 -8 -7 -3.04533 17.9906 8
 6 -8 -6 31.734 20.5949 8
 6 -8 -6 37.4679 20.2827 10
 6 -8 -5 1431.95 58.1074 10
 6 -8 -5 1378.11 53.6578 7
 6 -8 -4 338.393 31.8044 10
 6 -8 -4 306.432 28.1768 7
 6 -8 -3 8.6344 16.3297 10
 6 -8 -3 19.4074 15.3032 7
 6 -8 -2 79.6357 19.8498 10
 6 -8 -2 104.736 20.6501 7
 6 -8 -1 440.96 34.048 7
 6 -8 0 354.608 31.6529 7
 6 -8 1 233.899 27.2818 7
 6 -8 2 8.89385 17.6929 7
 6 -8 3 17.9322 17.2948 7
 6 -8 4 63.0782 18.9321 7
 6 -8 5 96.6768 19.7286 7
 6 -8 6 2517.52 66.0373 7
 6 -8 7 107.892 18.5897 7
 6 -8 8 112.955 17.4641 7
 6 -9 -8 68.2335 15.8961 10
 6 -9 -7 473.272 28.9756 10
 6 -9 -6 26.9161 14.8425 10
 6 -9 -5 -4.52505 13.3999 10
 6 -9 -4 37.527 14.5338 10
 6 -9 -3 288.915 24.1573 10
 6 -9 -2 93.7024 16.2656 10
 6 -9 -1 4.65872 11.5662 7
 6 -9 0 41.0139 12.6007 7
 6 -9 1 95.3659 15.4833 7
 6 -9 2 41.878 13.7423 7
 -7 0 23 151.23 22.144 3
 7 0 -22 -30.9887 17.9417 14
 7 0 -21 130.564 24.1464 14
 7 0 -20 32.6178 22.5816 14
 7 0 -19 1281.87 63.4301 14
 7 0 -18 -22.2987 24.5897 14
 7 0 -17 1057.08 61.1654 14
 -7 0 16 108.612 71.991 2
 7 0 -16 16.1751 20.0489 14
 -7 0 15 -3.4785 54.8459 2
 7 0 -15 -13.4368 20.9862 14
 -7 0 14 38.6943 53.329 2
 7 0 -14 -13.293 20.5233 14
 -7 0 13 401.517 93.9684 2
 -7 0 12 83.4394 69.3312 2
 -7 0 11 1589.64 158.217 2
 -7 0 10 69.3332 63.4604 2
 -7 0 9 357.816 79.5303 2
 -7 0 9 514.202 88.1253 16
 -7 0 8 5.89934 53.4857 2
 -7 0 8 -6.23384 41.8367 16
 -7 0 7 3325.51 209.243 2
 -7 0 7 3214.19 196.902 16
 -7 0 6 -22.1987 40.261 16
 -7 0 6 7.72639 49.1696 2
 -7 0 5 363.764 67.7378 16
 -7 0 4 15.1355 35.1688 16
 -7 0 3 3583.32 201.716 16
 -7 0 2 35.2515 45.2392 16
 -7 0 1 3424.17 200.066 16
 -7 0 0 -18.3555 41.7568 16
 -7 0 -1 42.0787 40.8134 16
 -7 0 -2 65.6451 45.2806 16
 -7 0 -3 284.924 75.6398 16
 -7 0 -4 27.9345 47.4546 16
 -7 0 -5 472.744 85.3759 16
 -7 0 -6 -53.6676 49.5227 16
 -7 0 -7 3370.2 202.762 16
 -7 0 -8 -58.6557 41.6222 16
 -7 0 -8 -0.4278 15.7749 13
 -7 0 -9 2649.35 184.478 16
 -7 0 -9 2621.09 79.2587 13
 -7 0 -10 2.6813 15.8404 13
 -7 0 -11 -9.08722 17.8608 13
 -7 0 -12 -4.94782 15.6674 13
 -7 0 -13 99.1371 20.0679 13
 -7 0 -14 29.8903 16.13 13
 -7 0 -15 726.782 34.6146 13
 -7 0 -16 -6.46697 11.1564 13
 7 -1 -22 26.0537 17.7449 14
 7 1 -22 -37.4795 17.6498 14
 7 -1 -21 20.6334 20.0166 14
 7 1 -21 15.8558 17.8086 14
 7 -1 -20 34.7628 23.583 14
 7 1 -20 71.864 21.8457 14
 7 -1 -19 89.0781 26.6354 14
 7 1 -19 48.5761 21.1223 14
 7 -1 -18 48.0568 23.6015 14
 7 -1 -17 1504.82 71.4831 14
 -7 -1 16 -89.5158 64.3024 2
 7 -1 -16 -32.1188 26.079 14
 -7 1 15 647.152 111.862 2
 -7 -1 15 488.977 106.673 2
 7 -1 -15 538.387 45.4614 14
 -7 -1 14 1515.68 170.981 2
 -7 1 14 1520.55 159.391 2
 7 -1 -14 1483.84 70.5585 14
 -7 1 13 2456.54 199.905 2
 -7 -1 13 2589.17 218.155 2
 -7 1 12 26.2864 49.3447 2
 -7 -1 12 -12.8829 60.3888 2
 -7 1 11 50.6957 51.489 2
 -7 -1 11 34.164 48.7089 2
 -7 1 10 3649.83 222.611 2
 -7 -1 10 3464.29 229.863 2
 -7 1 9 305.064 74.3087 2
 -7 -1 9 372.817 88.9751 2
 -7 -1 9 302.306 75.5467 16
 -7 1 8 15.8575 42.8642 2
 -7 -1 8 58.7027 61.6457 2
 -7 -1 8 36.5011 50.2758 16
 -7 -1 7 693.664 101.788 2
 -7 -1 7 607.466 94.9905 16
 -7 1 7 839.599 109.625 2
 -7 -1 6 86.3695 48.1703 16
 -7 -1 6 49.0797 49.5342 2
 -7 1 5 3947.78 200.675 16
 -7 -1 5 4090.56 225.448 16
 -7 1 4 1165.98 113.396 16
 -7 -1 4 1203.51 127.653 16
 -7 1 3 2171.81 150.523 16
 -7 -1 3 1889.38 153.883 16
 -7 1 2 325.401 66.5706 16
 -7 -1 2 454.09 86.3441 16
 -7 1 1 1160.32 114.032 16
 -7 -1 1 1055.77 117.263 16
 -7 -1 0 -34.484 51.164 16
 -7 1 0 -2.16315 34.0642 16
 -7 1 -1 2909.49 174.948 16
 -7 -1 -1 3014.9 190.259 16
 -7 1 -2 3760.59 200.895 16
 -7 -1 -2 3706.72 208.421 16
 -7 1 -3 70.3891 45.5158 16
 -7 -1 -3 -27.0896 50.0548 16
 -7 1 -4 632.671 91.7964 16
 -7 -1 -4 474.088 81.0178 16
 -7 1 -5 249.987 67.0712 16
 -7 -1 -5 207.337 59.8392 16
 -7 1 -6 1002.2 116.804 16
 -7 -1 -6 1291.16 127.167 16
 -7 1 -7 366.511 74.3818 16
 -7 -1 -7 334.78 68.8264 16
 -7 1 -7 339.225 30.9013 13
 -7 -1 -7 296.265 28.0667 13
 -7 1 -8 338.4 70.2664 16
 -7 -1 -8 279.431 69.1274 16
 -7 1 -8 326.882 31.0294 13
 -7 -1 -8 298.292 29.6973 13
 -7 1 -9 97.8657 20.9674 13
 -7 -1 -9 93.1356 20.2726 13
 -7 1 -10 48.0542 19.6537 13
 -7 -1 -10 70.8384 19.2757 13
 -7 1 -11 492.717 36.9488 13
 -7 -1 -11 478.85 34.1024 13
 -7 1 -12 126.547 21.7105 13
 -7 -1 -12 82.6897 18.3441 13
 -7 1 -13 54.3068 18.6266 13
 -7 -1 -13 55.0022 16.0009 13
 -7 -1 -14 172.329 20.1595 13
 -7 1 -14 133.541 20.4485 13
 -7 1 -15 4.63384 13.952 13
 -7 1 -16 61.5931 14.4274 13
 -7 2 22 130.07 20.5598 3
 -7 -2 22 171.486 22.029 3
 7 -2 -22 141.475 21.2812 14
 7 -2 -21 35.9309 18.0113 14
 7 -2 -20 161.627 28.3691 14
 7 -2 -19 281.786 36.8172 14
 7 -2 -18 1044.27 61.917 14
 7 -2 -17 460.299 43.4161 14
 7 -2 -16 157.008 29.9375 14
 -7 -2 15 1329.71 166.765 2
 7 -2 -15 1294.56 67.1664 14
 -7 -2 14 1896.46 195.354 2
 7 -2 -14 1968.62 82.108 14
 -7 -2 13 3133.44 245.733 2
 7 -2 -13 3396.32 103.505 14
 -7 -2 12 1632.79 175.014 2
 -7 -2 11 853.272 128.176 2
 -7 -2 10 167.067 75.0268 2
 -7 -2 9 4421.33 261.57 2
 -7 -2 8 160.641 61.6592 2
 -7 -2 7 3112.23 209.485 2
 -7 -2 7 3714.57 237.971 16
 -7 -2 6 268.692 70.1582 16
 -7 -2 6 340.747 81.8354 2
 -7 -2 5 -1.00629 47.4046 16
 -7 -2 4 2911.96 198.532 16
 -7 -2 3 2646.91 190.171 16
 -7 2 2 815.937 91.4003 16
 -7 -2 2 756.415 104.644 16
 -7 2 1 69.4729 37.6943 16
 -7 -2 1 131.315 54.687 16
 -7 2 0 12672.1 351.678 16
 -7 -2 0 12495 388.98 16
 -7 2 -1 992.738 104.145 16
 -7 -2 -1 1034.05 117.466 16
 -7 -2 -2 175.512 57.3464 16
 -7 2 -2 228.662 59.5274 16
 -7 -2 -3 492.804 83.1331 16
 -7 2 -3 643.198 90.0383 16
 -7 2 -4 332.899 72.1401 16
 -7 -2 -4 372.712 73.569 16
 -7 2 -5 454.227 80.6012 16
 -7 -2 -5 552.672 86.9769 16
 -7 2 -6 374.002 73.2967 16
 -7 -2 -7 394.66 34.5571 12
 -7 2 -7 394.925 79.6319 16
 -7 2 -7 379.245 32.6546 13
 -7 -2 -8 410.485 35.1768 12
 -7 2 -8 406.278 79.6036 16
 -7 2 -8 395.631 32.5711 13
 -7 -2 -9 262.503 29.5114 12
 -7 2 -9 271.834 62.2583 16
 -7 2 -9 229.632 27.8449 13
 -7 -2 -10 69.5572 20.6033 12
 -7 2 -10 46.8137 19.1973 13
 -7 -2 -11 279.723 28.2568 12
 -7 2 -11 265.128 27.534 13
 -7 -2 -12 49.2012 18.1263 12
 -7 2 -12 36.6595 17.1083 13
 -7 -2 -13 27.0502 16.2036 12
 -7 2 -13 59.5663 17.6146 13
 -7 -2 -14 44.2896 14.8661 12
 -7 2 -14 93.7215 18.9098 13
 -7 2 -15 456.595 28.2622 13
 -7 2 -16 4.74125 11.0921 13
 7 -3 -21 776.465 40.5501 14
 7 -3 -20 38.1801 20.0281 14
 7 -3 -19 507.441 40.0557 14
 7 -3 -18 111.83 26.5146 14
 7 -3 -17 51.2159 22.209 14
 7 -3 -16 108.832 28.484 14
 7 -3 -15 628.031 48.8497 14
 -7 -3 14 61.4077 56.7223 2
 7 -3 -14 -45.1522 59.2459 5
 7 -3 -14 -23.6889 25.8053 14
 -7 -3 13 278.678 84.4587 2
 7 -3 -13 270.881 64.0321 5
 7 -3 -13 288.97 34.5501 14
 -7 -3 12 142.754 60.8427 6
 7 -3 -12 104.565 27.0363 14
 -7 -3 11 606.102 103.282 2
 7 -3 -11 600.059 46.3224 14
 -7 -3 10 904.588 125.068 2
 -7 -3 9 6540.93 317.682 2
 -7 -3 8 76.7102 52.2471 2
 -7 -3 7 4223.28 242.642 2
 -7 -3 6 39.2673 54.496 16
 -7 -3 5 445.499 90.0048 16
 -7 -3 4 2379.05 187.387 16
 -7 -3 3 9227.13 355.556 16
 -7 -3 2 35.4912 55.9822 16
 -7 -3 1 184.561 65.2365 16
 -7 -3 0 1389.2 138.374 16
 -7 -3 -1 218.44 59.5817 16
 -7 3 -2 528.452 80.9577 16
 -7 3 -3 693.62 92.1712 16
 -7 3 -4 1259.37 122.996 16
 -7 -3 -5 -31.6141 19.2488 12
 -7 3 -5 37.5507 44.8747 16
 7 -3 5 5.14575 18.9368 14
 -7 -3 -6 2264.52 77.1216 12
 -7 3 -6 2068.87 159.339 16
 -7 3 -6 2021.35 65.4361 13
 -7 -3 -7 326.643 32.584 12
 -7 3 -7 233.204 62.0894 16
 -7 3 -7 295.663 27.342 13
 -7 -3 -8 211.783 27.4819 12
 -7 3 -8 214.84 63.0117 16
 -7 3 -8 202.264 25.1693 13
 -7 -3 -9 122.093 25.577 12
 -7 3 -9 116.952 22.3425 13
 -7 -3 -10 5483.14 113.488 12
 -7 3 -10 5281.18 102.934 13
 -7 -3 -11 116.405 22.6585 12
 -7 3 -11 136.437 21.8149 13
 -7 -3 -12 158.121 23.445 12
 -7 3 -12 176.471 22.1817 13
 -7 -3 -13 560.256 34.3191 12
 -7 3 -13 525.958 31.6731 13
 -7 -3 -14 126.122 18.7086 12
 -7 3 -14 152.112 18.6004 13
 -7 -3 -15 257.776 20.9145 12
 -7 3 -15 268.026 20.5266 13
 7 -4 -20 -11.8597 14.9086 14
 7 -4 -19 44.3006 18.4964 14
 7 -4 -18 12.3732 18.529 14
 7 -4 -17 105.554 24.6458 14
 7 -4 -16 264.875 32.8137 14
 7 -4 -15 75.2501 23.5936 14
 7 -4 -14 39.0969 20.9012 14
 7 -4 -13 448.678 40.8575 14
 -7 -4 12 0.80313 52.0433 6
 7 -4 -12 24.0154 44.6954 5
 7 -4 -12 4.20385 20.7653 14
 -7 -4 11 779.366 121.56 6
 7 -4 -11 926.83 55.8951 14
 7 -4 -11 920.354 121.801 5
 -7 -4 10 21.9691 60.6022 6
 7 -4 -10 64.3836 22.7537 8
 7 -4 -10 144.44 64.7798 5
 7 -4 -10 101.518 27.512 14
 -7 -4 9 456.631 98.8585 6
 7 -4 -9 368.452 36.677 8
 7 -4 -9 401.163 82.2852 5
 7 -4 -9 369.196 37.9722 14
 -7 -4 8 374.276 88.627 6
 7 -4 -8 346.184 35.7454 14
 -7 -4 7 115.978 60.5619 6
 -7 -4 7 252.84 73.9171 16
 -7 -4 6 5190.67 292.714 16
 -7 -4 5 -49.2366 51.4135 16
 -7 -4 4 4090.85 253.463 16
 -7 -4 3 3910.82 240.922 16
 -7 -4 2 1653.62 156.967 16
 -7 -4 -2 644.254 44.8148 12
 7 -4 2 639.596 45.9518 14
 7 -4 2 626.748 41.8435 7
 -7 -4 -3 461.145 38.3474 12
 7 -4 3 475.14 41.4604 14
 -7 -4 -4 325.282 32.1531 12
 7 -4 4 262.789 31.2526 14
 -7 -4 -5 24.7109 21.7328 12
 7 -4 5 11.4148 23.1686 14
 -7 -4 -6 104.158 21.986 12
 -7 -4 -7 22.7628 21.0075 12
 -7 -4 -8 370.393 34.8592 12
 -7 -4 -9 99.5571 23.6183 12
 -7 -4 -10 57.2847 20.8955 12
 -7 -4 -11 104.331 22.9823 12
 -7 -4 -12 52.9121 18.6056 12
 -7 -4 -13 -18.3192 14.6118 12
 -7 -4 -14 -0.25329 12.825 12
 -7 4 -14 25.4612 13.2445 14
 7 -5 -18 19.1253 15.5339 8
 7 -5 -18 49.8439 16.3585 14
 7 -5 -17 -22.241 16.1206 8
 7 -5 -17 35.1595 16.777 14
 7 -5 -16 556.583 38.6964 8
 7 -5 -16 498.611 36.2798 14
 7 -5 -15 43.5851 20.8233 8
 7 -5 -15 9.20225 18.2489 14
 7 -5 -14 -1.00415 18.9904 8
 7 -5 -14 16.0947 17.415 14
 7 -5 -13 145.409 28.2277 8
 7 -5 -13 192.772 28.5974 14
 -7 -5 12 778.772 50.2035 10
 7 -5 -12 739.364 49.339 8
 7 -5 -12 740.812 49.257 14
 -7 -5 11 389.256 38.3462 10
 7 -5 -11 386.038 38.4221 8
 7 -5 -11 408.672 39.0335 14
 7 -5 -10 1369 66.1695 8
 7 -5 -10 1389.2 65.8737 14
 7 -5 -9 5.49312 19.9489 8
 7 -5 -9 -8.15453 19.1266 14
 -7 -5 8 89.612 68.5017 6
 -7 -5 8 95.0819 46.7648 16
 7 -5 -8 56.6206 20.6206 8
 7 -5 -8 92.6866 26.0909 14
 -7 -5 7 160.443 62.8569 6
 -7 -5 7 18.5095 46.2976 16
 7 -5 -7 123.256 26.182 8
 7 -5 -7 161.231 30.3057 14
 -7 -5 6 3828.58 255.933 6
 -7 -5 6 4057.84 256.591 16
 7 -5 -6 3982.28 109.29 8
 7 -5 -6 3939.83 108.639 14
 -7 -5 5 143.177 71.2088 6
 7 -5 -5 174.467 31.8626 8
 7 -5 -5 168.173 28.484 14
 -7 -5 4 2322.76 195.903 6
 7 -5 -4 2241.51 83.8477 8
 7 -5 -4 2357.58 84.1826 14
 -7 -5 3 -32.0907 21.347 12
 7 -5 -3 -17.9695 23.5811 8
 7 -5 -3 0.52493 19.2906 14
 -7 -5 2 1534.89 65.833 12
 7 -5 -2 1561.11 70.3573 14
 -7 -5 1 392.01 35.4845 12
 7 -5 -1 430.951 39.9739 14
 -7 -5 0 2077.97 75.9459 12
 7 -5 0 2200.51 82.5287 14
 -7 -5 -1 1494.86 64.8581 12
 7 -5 1 1561.74 70.6265 14
 7 -5 1 1576.69 66.2217 7
 -7 -5 -2 67.0215 21.5393 12
 7 -5 2 85.1246 25.2243 14
 7 -5 2 73.6853 23.3444 7
 -7 -5 -3 495.825 40.0167 12
 7 -5 3 457.228 41.4696 14
 7 -5 3 432.846 37.0385 7
 -7 -5 -4 246.532 29.4543 12
 7 -5 4 251.49 32.547 14
 7 -5 4 208.392 27.0059 7
 -7 -5 -5 832.329 48.2378 12
 7 -5 5 776.707 45.4114 7
 -7 -5 -6 407.927 36.1972 12
 -7 -5 -7 1103.9 53.1449 12
 -7 -5 -8 17.4936 18.0414 12
 -7 -5 -9 272.729 29.5366 12
 -7 -5 -10 585.755 36.8781 12
 -7 -5 -11 -7.85258 15.1574 12
 -7 -5 -12 119.472 18.7567 12
 -7 -5 -13 101.45 15.7424 12
 7 -6 -17 5.45414 14.6949 8
 7 -6 -16 559.115 34.8819 8
 7 -6 -15 72.1968 19.1743 8
 7 -6 -14 219.038 28.6804 8
 7 -6 -13 2676.25 82.6892 8
 7 -6 -13 2540.75 75.3996 14
 -7 -6 12 288.363 31.2449 10
 7 -6 -12 285.274 33.1685 8
 7 -6 -12 296.622 30.9833 14
 7 -6 -11 79.7523 25.775 8
 7 -6 -11 123.843 26.669 14
 7 -6 -10 786.516 51.6081 8
 7 -6 -10 796.121 47.6533 14
 7 -6 -9 1756.66 73.3489 8
 7 -6 -9 1665.37 67.1986 14
 7 -6 -8 724.829 50.3314 8
 7 -6 -8 737.418 47.7748 14
 7 -6 -7 678.231 49.2083 8
 7 -6 -7 601.147 44.1132 14
 7 -6 -6 931.616 55.4552 8
 7 -6 -6 797.858 50.5403 14
 7 -6 -5 864.21 55.4811 8
 7 -6 -5 891.005 52.4577 14
 7 -6 -4 927.856 55.9722 8
 7 -6 -4 812.413 50.1542 14
 7 -6 -3 -14.7533 22.693 14
 7 -6 -2 101.082 23.0583 14
 7 -6 -1 2538 85.6445 14
 7 -6 -1 2632.84 84.3115 7
 7 -6 0 2729.04 88.7048 14
 7 -6 0 2797.62 86.5833 7
 7 -6 1 675.137 47.6115 14
 7 -6 1 781.078 48.3034 7
 -7 -6 -2 65.9591 18.1171 12
 7 -6 2 65.6084 22.773 14
 7 -6 2 106.671 23.8177 7
 -7 -6 -3 27.2709 15.8178 12
 7 -6 3 52.5446 21.488 14
 7 -6 3 35.1283 20.0142 7
 -7 -6 -4 58.1634 18.0487 12
 7 -6 4 62.1734 21.2756 7
 -7 -6 -5 10.1254 16.1905 12
 7 -6 5 -14.9924 18.3642 7
 -7 -6 -6 838.798 43.7227 12
 7 -6 6 895.128 47.0044 7
 -7 -6 -7 60.5571 17.8155 12
 7 -6 7 79.9087 18.4934 7
 -7 -6 -8 29.6059 16.0256 12
 -7 -6 -9 138.946 19.5425 12
 -7 -6 -10 -0.30536 12.0853 12
 -7 -6 -11 29.7126 12.3981 12
 7 -7 -14 94.6996 19.8418 8
 7 -7 -13 184.979 25.1254 8
 7 -7 -12 572.795 38.2379 8
 7 -7 -11 258.873 29.5297 8
 7 -7 -10 139.816 26.8896 8
 7 -7 -9 10.4541 19.4667 8
 7 -7 -8 0.02624 19.921 8
 7 -7 -7 719.566 48.2228 8
 7 -7 -6 327.701 36.1967 8
 7 -7 -6 333.337 31.9002 7
 7 -7 -5 164.978 24.0543 14
 7 -7 -5 141.681 24.5583 7
 7 -7 -4 466.669 35.4157 14
 7 -7 -4 527.93 37.691 7
 7 -7 -3 126.361 22.9613 14
 7 -7 -3 171.966 25.8823 7
 7 -7 -2 119.62 22.6137 14
 7 -7 -2 92.8792 23.9483 7
 7 -7 -1 7.24796 17.7818 14
 7 -7 -1 7.40152 18.1709 7
 7 -7 0 590.215 40.2371 14
 7 -7 0 475.951 37.6443 7
 7 -7 1 161.585 26.5887 7
 7 -7 2 129.215 24.1562 7
 7 -7 3 801.436 44.9873 7
 7 -7 4 163.953 25.4553 7
 7 -7 5 964.93 45.5495 7
 7 -7 6 78.5112 17.606 7
 7 -7 7 82.0055 17.1711 7
 7 -7 8 469.138 27.3641 7
 7 -8 -11 46.0353 15.5268 10
 7 -8 -11 28.9433 12.7369 8
 7 -8 -10 590.868 32.5331 10
 7 -8 -10 701.897 35.9087 8
 7 -8 -9 356.545 28.0741 10
 7 -8 -8 7.85756 15.4429 10
 7 -8 -7 91.9696 18.4792 10
 7 -8 -7 89.6661 16.2399 7
 7 -8 -6 642.043 36.0235 10
 7 -8 -6 599.184 32.8596 7
 7 -8 -5 11.3999 14.1526 10
 7 -8 -5 16.7866 14.1155 7
 7 -8 -4 27.1216 15.1568 7
 7 -8 -3 23.1209 15.7798 7
 7 -8 -2 25.9967 15.2128 7
 7 -8 -1 305.755 27.236 7
 7 -8 0 60.9912 16.5531 7
 7 -8 1 8.29748 13.891 7
 7 -8 2 -20.7881 15.5903 7
 7 -8 3 274.201 24.645 7
 7 -8 4 62.2984 16.1087 7
 -8 0 21 26.7387 20.035 3
 8 0 -21 4.9831 15.0419 14
 -8 0 20 196.935 29.6774 3
 8 0 -20 203.448 25.8974 14
 -8 0 19 19.9365 23.5971 3
 8 0 -19 5.82362 18.4717 14
 -8 0 18 393.317 43.2825 3
 8 0 -18 322.759 33.6175 14
 -8 0 17 -45.2774 30.2932 3
 8 0 -17 -17.913 21.9323 14
 -8 0 16 36.8417 27.3953 3
 8 0 -16 -26.1932 23.2293 14
 -8 0 15 -0.04092 26.4692 3
 -8 0 14 17.217 56.5491 2
 -8 0 14 -25.4771 29.4718 3
 -8 0 13 80.1671 64.6119 2
 -8 0 13 -50.7942 29.7412 3
 -8 0 12 1140.77 147.754 2
 -8 0 12 1335.08 73.7338 3
 -8 0 11 72.2234 57.011 2
 -8 0 11 2.39906 24.6021 3
 -8 0 10 983.871 135.092 2
 -8 0 9 38.0828 53.0025 2
 -8 0 8 1602.3 149.491 16
 -8 0 7 -73.859 52.7515 16
 -8 0 6 1529.02 143.811 16
 -8 0 5 -2.03163 40.8909 16
 -8 0 4 989.386 122.507 16
 -8 0 3 -3.60319 49.2769 16
 -8 0 2 3516.33 212.672 16
 -8 0 1 13.8792 44.0372 16
 -8 0 0 62.2398 42.0207 16
 -8 0 -1 -1.44586 44.3071 16
 -8 0 -2 57.2038 48.6233 16
 -8 0 -3 -11.0424 39.448 16
 -8 0 -4 46.7814 41.8557 16
 -8 0 -4 70.7347 19.4133 13
 -8 0 -5 -15.3976 39.1122 16
 -8 0 -5 10.8426 16.6325 13
 -8 0 -6 667.237 96.5893 16
 -8 0 -6 654.327 42.2314 13
 -8 0 -7 28.5934 19.5532 13
 -8 0 -8 732.439 43.9798 13
 -8 0 -9 -20.5327 17.8964 13
 -8 0 -10 -14.7539 17.1052 13
 -8 0 -11 -3.23511 16.7532 13
 -8 0 -12 -16.5942 15.8443 13
 -8 0 -13 12.7287 13.4319 13
 -8 0 -14 1656.53 46.2253 13
 -8 1 21 51.5839 20.7323 3
 -8 -1 21 75.2131 22.6418 3
 8 -1 -21 25.4784 16.7501 14
 -8 1 20 12.6074 20.5194 3
 -8 -1 20 16.3341 20.8908 3
 8 -1 -20 24.4743 18.2324 14
 -8 1 19 145.227 28.0485 3
 -8 -1 19 151.724 30.3568 3
 8 -1 -19 116.316 24.8639 14
 8 -1 -18 673.485 47.4644 14
 -8 1 18 785.232 56.0171 3
 -8 -1 18 749.655 56.3179 3
 -8 1 17 -27.6836 26.0769 3
 -8 -1 17 3.2666 25.1137 3
 8 -1 -17 -7.11966 23.3397 14
 -8 1 16 51.6374 25.7515 3
 -8 -1 16 30.3749 26.1371 3
 8 -1 -16 91.2576 25.7607 14
 -8 1 15 457.631 48.827 3
 -8 -1 15 413.012 47.8509 3
 8 -1 -15 464.379 42.6449 14
 8 -1 -14 2620.94 91.5993 14
 -8 1 14 2838.51 104.747 3
 -8 -1 14 2508.48 102.844 3
 -8 1 13 426.912 88.2121 2
 -8 -1 13 387.618 95.9195 2
 -8 1 13 422.771 45.5146 3
 -8 -1 13 428.964 47.3001 3
 8 -1 -13 397.932 39.452 14
 -8 -1 12 617.616 117.46 2
 -8 -1 12 617.293 106.303 16
 8 -1 -12 553.321 44.4927 14
 -8 1 12 713.774 54.7701 3
 -8 -1 12 604.548 53.6725 3
 -8 1 12 623.141 101.052 2
 -8 -1 11 166.42 75.5136 2
 -8 1 11 176.573 32.8061 3
 -8 -1 11 138.038 30.8318 3
 -8 -1 11 134.47 63.4412 16
 8 -1 -11 175.936 30.2233 14
 -8 1 11 142.333 68.5521 2
 -8 -1 10 443.236 98.5892 2
 -8 -1 10 378.505 89.9586 16
 -8 1 10 559.001 47.0149 3
 -8 -1 10 533.899 47.4464 3
 -8 -1 9 463.962 91.7815 16
 -8 -1 9 511.185 103.443 2
 -8 -1 8 1486.12 154.368 16
 -8 -1 7 995.307 126.053 16
 -8 -1 6 2011 176.803 16
 -8 1 5 306.678 60.1381 16
 -8 -1 5 363.468 82.9798 16
 -8 1 4 4695.7 234.581 16
 -8 -1 4 4520.92 250.661 16
 -8 1 3 145.287 57.3285 16
 -8 -1 3 69.8193 54.4222 16
 -8 1 2 2137.01 162.119 16
 -8 -1 2 2244.19 177.565 16
 -8 1 1 1889.96 153.024 16
 -8 -1 1 1996.42 166.094 16
 -8 1 0 -8.19073 44.0293 16
 -8 -1 0 -20.4491 49.614 16
 -8 1 -1 223.454 59.0717 16
 -8 -1 -1 174.568 62.6467 16
 -8 1 -2 -15.1152 50.0266 16
 -8 -1 -2 -68.7223 51.6922 16
 -8 1 -3 -43.2135 51.0181 16
 -8 -1 -3 38.671 44.8015 16
 -8 1 -3 -4.26809 15.4598 13
 -8 -1 -3 3.20152 16.1635 13
 -8 1 -4 1078.82 120.065 16
 -8 -1 -4 996.941 118.005 16
 -8 1 -4 1095.44 50.8562 13
 -8 -1 -4 936.566 47.7571 13
 -8 1 -5 124.409 46.679 16
 -8 -1 -5 85.6123 53.4771 16
 -8 1 -5 154.956 24.012 13
 -8 -1 -5 161.313 23.9985 13
 -8 1 -6 1982.55 164.064 16
 -8 -1 -6 2047.7 161.833 16
 -8 1 -6 2160.48 71.654 13
 -8 -1 -6 2206.37 71.9207 13
 -8 1 -7 618.018 40.7716 13
 -8 -1 -7 569.099 39.4371 13
 -8 1 -8 736.684 43.7195 13
 -8 -1 -8 724.855 42.2186 13
 -8 1 -9 35.1014 17.1229 13
 -8 -1 -9 17.4811 15.3992 13
 -8 1 -10 125.994 22.6536 13
 -8 -1 -10 168.978 22.4089 13
 -8 1 -11 463.933 33.1519 13
 -8 -1 -11 422.831 29.9323 13
 -8 1 -12 -11.2073 14.8848 13
 -8 -1 -12 12.2997 12.5407 13
 -8 -1 -13 106.534 15.7339 13
 -8 1 -13 142.535 19.5334 13
 -8 1 -14 30.1391 12.5065 13
 8 -2 -21 24.7551 16.6938 14
 -8 2 20 -21.981 15.9852 3
 -8 -2 20 -13.9853 17.5241 3
 8 -2 -20 10.9849 17.3746 14
 8 -2 -19 1096.92 53.3991 14
 -8 2 19 1231.06 56.7833 3
 -8 -2 19 1205.67 58.1506 3
 -8 2 18 160.642 27.7403 3
 -8 -2 18 156.932 29.2412 3
 8 -2 -18 123.673 27.5082 14
 8 -2 -17 2028.87 76.7807 14
 -8 2 17 2235.89 82.5911 3
 -8 -2 17 2177.54 86.5525 3
 -8 -2 16 468.827 45.5632 3
 8 -2 -16 468.075 42.796 14
 8 -2 -15 541.329 45.1148 14
 -8 2 15 566.344 46.9894 3
 -8 -2 15 565.714 50.7398 3
 -8 2 14 150.673 30.7114 3
 -8 -2 14 134.888 33.0229 3
 8 -2 -14 123.961 27.4668 14
 -8 -2 13 2589.57 222.841 2
 -8 -2 13 2575.88 216.939 16
 8 -2 -13 2634.97 92.8063 14
 -8 2 13 2835.92 97.7002 3
 -8 -2 13 2561.67 99.0922 3
 -8 -2 12 1287.53 160.763 2
 -8 -2 12 1375.71 167.686 16
 8 -2 -12 1319.93 66.0187 14
 -8 2 12 1452.36 71.3226 3
 -8 -2 12 1275.62 71.4605 3
 -8 -2 11 1218.33 152.49 2
 -8 -2 11 1370.41 161.936 16
 8 -2 -11 1357.47 66.8672 14
 -8 2 11 1422.64 69.9715 3
 -8 -2 11 1484.9 74.7648 3
 -8 -2 10 2585.66 210.167 2
 -8 -2 10 2683.84 218.616 16
 8 -2 -10 3147.16 98.9033 14
 -8 2 10 3151.85 101.229 3
 -8 -2 10 3286.11 108.037 3
 -8 -2 9 2773.05 216.911 2
 -8 -2 9 2816.64 221.608 16
 8 -2 -9 2891.62 93.7685 14
 -8 2 9 2900.85 96.3342 3
 -8 -2 9 3138.21 103.637 3
 -8 -2 8 9.70354 55.2548 16
 -8 -2 7 82.1429 51.8635 16
 -8 -2 6 5442.43 294.368 16
 -8 -2 5 8747.26 364.864 16
 -8 -2 4 1751.8 169.143 16
 -8 -2 3 5111.94 271.848 16
 -8 -2 2 -51.8194 58.0707 16
 -8 2 1 90.8737 46.8215 16
 -8 -2 1 133.408 63.3237 16
 -8 2 0 3565.74 200.582 16
 -8 -2 0 3683.35 228.325 16
 -8 2 -1 311.328 66.0696 16
 -8 -2 -1 287.848 76.2772 16
 -8 -2 -2 322.874 33.2912 12
 -8 2 -2 264.968 63.1637 16
 -8 -2 -2 275.191 68.1159 16
 -8 2 -2 259.387 25.9561 13
 -8 -2 -3 98.0327 23.3083 12
 -8 2 -3 192.92 63.6879 16
 -8 -2 -3 95.9043 52.2999 16
 -8 2 -3 92.5252 19.5129 13
 -8 -2 -3 90.6552 18.8867 13
 -8 -2 -4 31.9567 19.393 12
 -8 2 -4 6.06058 42.5117 16
 -8 -2 -4 39.8161 44.6741 16
 -8 2 -4 27.9033 15.5091 13
 -8 -2 -4 29.4332 14.7105 13
 -8 -2 -5 528.128 39.4504 12
 -8 2 -5 500.509 84.0434 16
 -8 -2 -5 591.639 91.9007 16
 -8 2 -5 525.827 37.2997 13
 -8 -2 -5 446.051 33.7866 13
 -8 -2 -6 13.7237 18.161 12
 -8 2 -6 -5.8415 15.7028 13
 -8 -2 -6 12.9089 16.717 13
 -8 -2 -7 579.383 40.0888 12
 -8 2 -7 519.585 36.3766 13
 -8 -2 -8 19.697 18.5949 12
 -8 2 -8 10.1684 16.8444 13
 -8 -2 -9 1044.73 48.911 12
 -8 2 -9 979.368 47.4738 13
 -8 -2 -10 426.132 31.5424 12
 -8 2 -10 406.074 31.6405 13
 -8 -2 -11 30.1227 14.8115 12
 -8 2 -11 -4.48265 15.247 13
 -8 2 -12 182.432 22.8307 13
 -8 2 -13 37.2041 14.0548 13
 -8 2 -14 1172.83 37.7796 13
 8 -3 -20 65.6277 18.7387 14
 8 -3 -19 189.108 26.4255 14
 8 -3 -18 37.7118 21.0777 14
 8 -3 -17 39.4794 23.0316 14
 8 -3 -16 -14.9871 23.9469 14
 8 -3 -15 26.0003 22.9946 14
 8 -3 -14 791.326 53.1889 14
 8 -3 -13 1043.02 59.4586 14
 8 -3 -12 143.09 27.7778 14
 -8 -3 11 37.0619 44.9881 2
 8 -3 -11 67.4807 24.3039 14
 -8 -3 10 690.709 123.799 16
 8 -3 -10 668.804 48.894 14
 -8 -3 10 621.027 115.462 2
 -8 -3 9 3.61246 59.7762 16
 8 -3 -9 58.6881 23.3469 14
 -8 -3 9 78.4619 52.8037 2
 -8 -3 8 9.6033 59.4094 16
 8 -3 -8 -0.56942 22.4045 14
 -8 -3 7 755.721 112.046 16
 8 -3 -7 429.553 39.0962 14
 -8 -3 6 1273.05 148.737 16
 8 -3 -6 1098.88 59.0518 14
 -8 -3 5 179.86 68.038 16
 8 -3 -5 102.362 21.0442 14
 -8 -3 4 3005.74 217.987 16
 8 -3 -4 3068.84 95.233 14
 -8 -3 3 2472.42 194.303 16
 8 -3 -3 2506.85 85.7965 14
 -8 -3 2 1.99554 47.9362 16
 8 -3 -2 53.0053 18.9664 14
 -8 -3 1 1004.24 55.7919 12
 -8 -3 1 1021.89 123.532 16
 8 -3 -1 1101.68 58.0176 14
 -8 -3 0 34.0624 20.6901 12
 -8 -3 0 15.1063 46.3161 16
 8 -3 0 -22.9645 19.5206 14
 -8 -3 -1 14.7495 19.7238 12
 -8 -3 -1 -23.1674 45.7727 16
 8 -3 1 17.2889 21.4066 14
 -8 -3 -2 1197.87 59.3013 12
 8 -3 2 1138.64 58.0538 14
 -8 -3 -3 183.057 29.4347 12
 -8 3 -3 202.219 52.8756 16
 8 -3 3 145.204 25.7169 14
 -8 -3 -4 992.936 53.7657 12
 -8 3 -4 861.811 103.511 16
 8 -3 4 964.225 53.9551 14
 -8 -3 -5 472.522 38.3016 12
 -8 3 -5 514.932 34.241 13
 -8 -3 -6 34.2806 19.0484 12
 -8 3 -6 27.3397 15.4849 13
 -8 -3 -7 -41.7176 21.8709 12
 -8 3 -7 2.26397 15.5896 13
 -8 -3 -8 26.322 17.7391 12
 -8 3 -8 56.0515 17.7036 13
 -8 -3 -9 450.026 34.7005 12
 -8 3 -9 460.009 31.075 13
 -8 -3 -10 -21.7208 15.7317 12
 -8 3 -10 15.1688 14.1888 13
 -8 -3 -11 170.475 21.5076 12
 -8 3 -11 171.711 20.064 13
 -8 -3 -12 145.114 18.8521 12
 -8 3 -12 126.957 17.9657 13
 -8 -3 -13 195.686 18.3033 12
 -8 3 -13 220.786 18.6227 13
 8 -4 -19 427.249 29.9933 14
 8 -4 -18 -0.14095 16.6762 14
 8 -4 -17 49.7507 20.1969 14
 8 -4 -16 296.507 31.4328 14
 8 -4 -15 1101.23 55.7959 14
 8 -4 -14 304.673 34.4157 14
 8 -4 -13 330.734 36.2069 14
 8 -4 -12 119.861 28.8743 14
 8 -4 -11 1499.27 69.1803 14
 8 -4 -10 2050.44 81.2418 14
 8 -4 -9 968.859 57.1612 14
 -8 -4 8 -36.5584 55.8557 16
 8 -4 -8 -16.9196 25.6907 14
 -8 -4 7 1794.67 180.98 16
 8 -4 -7 1814.96 76.536 14
 -8 -4 6 994.823 135.032 16
 8 -4 -6 975.067 57.7823 14
 -8 -4 5 436.421 86.0368 16
 8 -4 -5 524.211 43.1088 14
 -8 -4 4 618.438 107.341 16
 8 -4 -4 663.369 48.6483 14
 -8 -4 3 195.249 64.4893 16
 8 -4 -3 156.358 27.4061 14
 -8 -4 2 112.778 22.5913 12
 8 -4 -2 166.297 30.2113 14
 -8 -4 1 -12.5468 21.653 12
 8 -4 -1 6.16803 21.135 14
 -8 -4 0 3243.04 96.5214 12
 8 -4 0 3335.17 100.671 14
 -8 -4 -1 9433.89 161.671 12
 8 -4 1 9679.65 169.372 14
 -8 -4 -2 283.003 35.3681 12
 8 -4 2 232.262 34.3448 14
 -8 -4 -3 6398.51 129.156 12
 8 -4 3 6004.35 130.868 14
 -8 -4 -4 487.024 41.9986 12
 8 -4 4 444.091 40.694 14
 -8 -4 -5 24.6625 22.2121 12
 -8 -4 -6 13.1803 20.0146 12
 -8 -4 -7 948.102 50.513 12
 -8 -4 -8 17.9291 19.6211 12
 -8 -4 -9 845.051 42.4523 12
 -8 -4 -10 62.4655 18.8647 12
 -8 -4 -11 240.885 22.9784 12
 -8 -4 -12 163.105 18.0196 12
 8 -5 -17 16.0511 14.0787 14
 8 -5 -16 275.466 26.4156 14
 8 -5 -15 29.0577 18.0201 14
 8 -5 -14 -8.12569 18.0376 14
 8 -5 -13 -53.1741 23.0064 14
 8 -5 -12 19.4487 19.0321 8
 8 -5 -12 25.4916 20.3085 14
 8 -5 -11 19.3093 18.521 8
 8 -5 -11 3.40676 20.0332 14
 8 -5 -10 905.251 52.2929 8
 8 -5 -10 921.167 53.2673 14
 8 -5 -9 492.337 40.222 8
 8 -5 -9 510.148 43.4488 14
 8 -5 -8 220.096 31.1655 8
 8 -5 -8 207.676 31.3525 14
 8 -5 -7 256.668 30.7164 8
 8 -5 -7 285.394 34.4773 14
 8 -5 -6 666.743 47.0043 8
 8 -5 -6 666.563 47.197 14
 -8 -5 5 1058.53 56.5131 12
 8 -5 -5 1268.23 62.7113 8
 8 -5 -5 1247.69 63.6071 14
 -8 -5 4 2025.04 75.8899 12
 8 -5 -4 2134.98 81.4017 14
 -8 -5 3 6.39804 19.332 12
 8 -5 -3 14.8676 21.1678 14
 -8 -5 2 -27.9131 18.6793 12
 8 -5 -2 9.40219 21.7165 14
 -8 -5 1 951.669 52.8922 12
 8 -5 -1 1047.47 58.2636 14
 -8 -5 0 35.5385 19.5784 12
 8 -5 0 37.2366 25.1248 14
 8 -5 0 100.133 25.5164 7
 -8 -5 -1 1381 61.5653 12
 8 -5 1 1353.76 64.8557 14
 8 -5 1 1333.47 59.5326 7
 -8 -5 -2 21.5839 22.5176 12
 8 -5 2 10.7119 21.1805 14
 8 -5 2 -21.4156 17.5218 7
 -8 -5 -3 1710.54 65.2122 12
 8 -5 3 1596.72 69.3648 14
 8 -5 3 1676.25 62.9547 7
 -8 -5 -4 183.41 26.5796 12
 -8 -5 -5 -20.3621 19.0288 12
 -8 -5 -6 472.385 35.7383 12
 -8 -5 -7 43.0087 17.1452 12
 -8 -5 -8 1.84656 14.8689 12
 -8 -5 -9 251.326 24.0517 12
 -8 -5 -10 167.486 19.4511 12
 8 -6 -15 169.964 21.4076 8
 8 -6 -15 156.046 18.4493 14
 8 -6 -14 6.32545 15.7246 8
 8 -6 -14 29.4672 15.4218 14
 8 -6 -13 182.556 24.2159 8
 8 -6 -13 152.977 22.1005 14
 8 -6 -12 135.626 22.7486 8
 8 -6 -12 102.136 20.6981 14
 8 -6 -11 190.973 27.1169 8
 8 -6 -11 188.77 25.5486 14
 8 -6 -10 432.619 37.0764 8
 8 -6 -10 355.649 32.7538 14
 8 -6 -9 25.8637 18.7092 8
 8 -6 -9 12.9405 18.045 14
 8 -6 -8 1085.41 54.7675 8
 8 -6 -8 941.404 50.6912 14
 8 -6 -7 861.84 50.2203 8
 8 -6 -7 876.332 50.0347 14
 8 -6 -6 193.318 27.6264 14
 8 -6 -5 -5.2425 21.5939 14
 8 -6 -4 -19.4321 22.3906 14
 8 -6 -3 719.163 46.7082 14
 8 -6 -3 790.501 46.425 7
 8 -6 -2 7.11572 20.5021 14
 8 -6 -2 -0.83795 19.0047 7
 -8 -6 1 200.601 25.9011 12
 8 -6 -1 225.432 28.8406 14
 8 -6 -1 288.115 30.7623 7
 -8 -6 0 99.1077 21.2587 12
 8 -6 0 63.8834 23.8211 14
 8 -6 0 67.0302 21.6109 7
 -8 -6 -1 487.224 35.13 12
 8 -6 1 509.218 41.4241 14
 8 -6 1 467.18 36.1485 7
 -8 -6 -2 147.197 23.2413 12
 8 -6 2 91.2683 21.1519 7
 -8 -6 -3 509.464 34.4448 12
 8 -6 3 471.605 33.3179 7
 -8 -6 -4 57.8331 17.9012 12
 8 -6 4 10.231 14.8589 7
 -8 -6 -5 301.794 26.7129 12
 8 -6 5 322.456 26.9796 7
 -8 -6 -6 21.258 13.3278 12
 -8 -6 -7 123.508 17.6976 12
 -8 -6 -8 33.3671 13.0678 12
 8 -7 -12 -23.6818 15.7541 8
 8 -7 -11 224.071 24.3319 8
 8 -7 -11 217.726 20.2976 7
 8 -7 -10 14.6227 15.2408 8
 8 -7 -10 18.2067 12.5658 7
 8 -7 -9 23.6165 14.2276 14
 8 -7 -9 36.6851 14.4741 7
 8 -7 -8 43.2945 15.2758 14
 8 -7 -8 110.232 19.7588 7
 8 -7 -7 94.652 18.885 14
 8 -7 -7 113.147 19.3177 7
 8 -7 -6 -9.78121 14.6661 14
 8 -7 -6 26.5708 16.4852 7
 8 -7 -5 506.138 34.7741 14
 8 -7 -5 578.186 36.3453 7
 8 -7 -4 622.322 38.215 14
 8 -7 -4 665.342 39.0612 7
 8 -7 -3 13.4949 15.1971 14
 8 -7 -3 -17.9474 16.6182 7
 8 -7 -2 97.7907 19.4091 14
 8 -7 -2 72.3585 19.3142 7
 8 -7 -1 33.2551 17.4647 14
 8 -7 -1 60.6771 19.3528 7
 8 -7 0 5.95118 15.5743 7
 8 -7 1 74.8801 18.5345 7
 8 -7 2 34.4851 15.1446 7
 8 -7 3 55.341 16.4904 7
 8 -7 4 -0.76246 12.6391 7
 8 -8 -4 122.241 16.1037 7
 8 -8 -3 205.012 19.5187 7
 8 -8 -2 26.686 12.044 7
 -9 0 20 -4.0963 17.8606 3
 -9 0 19 522.159 39.3699 3
 -9 0 18 -25.1617 24.2512 3
 -9 0 17 -37.3826 27.3148 3
 -9 0 16 14.8532 26.7308 3
 -9 0 15 144.587 34.4389 3
 -9 0 14 34.2583 27.4734 3
 -9 0 13 1248.52 71.4425 3
 -9 0 12 41.6753 32.2747 3
 -9 0 11 346.775 41.5459 3
 -9 0 10 3.84656 24.6501 3
 -9 0 9 115.273 27.4136 3
 -9 0 8 -0.4032 21.7783 3
 -9 0 8 -3.65901 43.5834 16
 -9 0 7 949.317 119.132 16
 -9 0 7 1207.53 66.9232 3
 -9 0 6 -8.55573 25.4065 3
 -9 0 6 -85.1779 61.7006 16
 -9 0 5 4154.88 240.421 16
 -9 0 5 4421.3 122.409 3
 -9 0 4 -9.05911 22.22 3
 -9 0 4 55.781 47.098 16
 -9 0 3 3913.56 233.731 16
 -9 0 3 4435.53 120.35 3
 -9 0 2 15.1535 21.5333 3
 -9 0 2 -7.53314 40.0771 16
 -9 0 1 680.523 100.532 16
 -9 0 1 832.057 54.8884 3
 -9 0 0 -21.8377 23.851 3
 -9 0 0 26.0109 45.1797 16
 -9 0 -1 2196.5 173.603 16
 -9 0 -1 2036.85 80.9261 3
 -9 0 -2 17.9285 42.2957 16
 -9 0 -2 -9.6014 18.8382 13
 -9 0 -3 729.004 44.3651 13
 -9 0 -4 -4.68074 17.4305 13
 -9 0 -5 -3.69192 17.3499 13
 -9 0 -6 16.4564 17.7628 13
 -9 0 -7 369.068 32.4781 13
 -9 0 -8 -7.59313 16.2616 13
 -9 0 -9 106.187 19.9643 13
 -9 0 -10 0.8889 13.7926 13
 -9 0 -11 266.816 22.2174 13
 -9 0 -12 9.65004 11.3685 13
 -9 1 20 -27.5374 16.9216 3
 -9 -1 20 9.87293 16.3471 3
 -9 1 19 38.6725 20.2005 3
 -9 -1 19 33.0646 18.7277 3
 9 -1 -19 29.3728 17.5104 14
 -9 1 18 92.0084 23.7798 3
 -9 -1 18 106.758 25.3631 3
 9 -1 -18 33.1225 17.6415 14
 -9 1 17 -21.0641 24.7639 3
 -9 -1 17 -52.2597 27.1821 3
 9 -1 -17 -6.68095 18.8093 14
 -9 1 16 4.08319 23.4094 3
 -9 -1 16 1.8214 23.9354 3
 9 -1 -16 17.8135 18.45 14
 9 -1 -15 1236 59.336 14
 -9 -1 15 1286.85 71.4507 3
 -9 1 14 19.0166 25.2136 3
 -9 -1 14 34.8288 26.5728 3
 9 -1 -14 -7.19508 18.6739 14
 -9 1 13 1258.74 69.5657 3
 -9 -1 13 1055.73 66.6563 3
 -9 1 12 65.8516 27.8367 3
 -9 -1 12 78.2121 29.4317 3
 -9 1 11 630.289 51.0528 3
 -9 -1 11 687.179 53.7293 3
 -9 -1 10 970.743 127.853 16
 -9 1 10 941.745 60.1515 3
 -9 -1 10 862.727 60.0693 3
 -9 1 9 179.696 30.0743 3
 -9 -1 9 153.108 31.4495 3
 -9 -1 9 128.087 47.7184 16
 -9 1 8 323.021 36.5877 3
 -9 -1 8 300.565 39.162 3
 -9 -1 8 287.777 78.817 16
 -9 1 7 342.987 39.1913 3
 -9 -1 7 345.977 39.4487 3
 -9 -1 7 403.086 86.5322 16
 -9 1 6 66.5113 22.2429 3
 -9 -1 6 51.0673 21.6523 3
 -9 -1 5 1977.25 178.525 16
 -9 1 5 2007.15 83.1686 3
 -9 -1 5 1833.04 81.0518 3
 -9 1 4 7.53684 23.0067 3
 -9 -1 4 3.71675 20.8999 3
 -9 1 4 -21.2655 40.5763 16
 -9 -1 4 5.41721 53.8379 16
 -9 1 3 3108.32 199.027 16
 -9 -1 3 3151.16 217.258 16
 -9 -1 3 3473.36 106.69 3
 -9 1 2 79.5684 21.6186 3
 -9 -1 2 44.8245 21.187 3
 -9 -1 2 43.6697 19.9948 12
 -9 1 2 71.3748 39.7089 16
 -9 -1 2 118.777 60.253 16
 -9 -1 1 720.2 45.9564 12
 -9 1 1 716.044 97.942 16
 -9 -1 1 657.764 106.598 16
 -9 1 1 790.526 52.4444 3
 -9 -1 1 744.684 50.7209 3
 -9 1 0 24.7663 42.2488 16
 -9 -1 0 -21.9134 50.3415 16
 -9 1 0 72.0315 25.0712 3
 -9 -1 0 60.4286 21.1295 3
 -9 1 -1 15.1656 46.8187 16
 -9 -1 -1 5.24325 45.6299 16
 -9 1 -1 13.7852 20.7133 3
 -9 -1 -1 2.57581 23.9815 3
 -9 1 -1 44.2016 18.6791 13
 -9 1 -2 120.047 22.3688 13
 -9 -1 -2 104.573 21.0522 13
 -9 1 -3 98.2145 21.0939 13
 -9 -1 -3 116.68 21.4889 13
 -9 1 -4 -8.78701 16.9 13
 -9 -1 -4 -3.3929 17.2251 13
 -9 1 -5 404.609 34.2322 13
 -9 -1 -5 448.71 34.9348 13
 -9 1 -6 20.4209 20.1288 13
 -9 -1 -6 23.0938 17.5024 13
 -9 1 -7 167.465 25.9579 13
 -9 -1 -7 178.616 25.1026 13
 -9 1 -8 365.224 31.6294 13
 -9 -1 -8 330.174 28.1665 13
 -9 1 -9 62.0934 18.3591 13
 -9 -1 -9 45.072 16.0936 13
 -9 1 -10 43.3539 15.5335 13
 -9 -1 -10 49.3525 13.9284 13
 -9 1 -11 72.9388 15.3501 13
 -9 -1 -11 61.3407 13.2992 13
 -9 1 -12 133.755 15.8874 13
 -9 2 19 94.9676 20.1845 3
 -9 -2 19 67.9907 18.1069 3
 9 -2 -19 73.0734 19.7252 14
 -9 2 18 -13.9562 16.5583 3
 -9 -2 18 5.3483 17.6173 3
 9 -2 -18 20.6827 18.6408 14
 -9 2 17 -4.39135 20.1191 3
 -9 -2 17 -21.0616 22.2374 3
 9 -2 -17 18.5714 19.4646 14
 -9 2 16 30.7504 19.8243 3
 -9 -2 16 -21.2568 21.891 3
 9 -2 -16 10.4707 20.2131 14
 -9 2 15 10.6222 20.1417 3
 -9 -2 15 -17.3208 23.3759 3
 9 -2 -15 -6.54665 20.7908 14
 -9 2 14 131.216 28.0214 3
 -9 -2 14 102.369 27.4182 3
 9 -2 -14 117.766 26.7777 14
 -9 2 13 65.2658 24.762 3
 -9 -2 13 48.5963 24.195 3
 9 -2 -13 69.7866 23.0762 14
 -9 2 12 313.447 36.1994 3
 -9 -2 12 317.489 39.0826 3
 9 -2 -12 286.421 33.0203 14
 -9 2 11 51.3154 21.3969 3
 -9 -2 11 14.1351 22.012 3
 9 -2 -11 11.2626 21.2729 14
 -9 2 10 71.4573 25.0167 3
 -9 -2 10 61.2513 22.3906 3
 9 -2 -10 21.2546 20.3098 14
 -9 2 9 61.4791 23.4121 3
 -9 -2 9 65.5583 24.7919 3
 9 -2 -9 53.4162 20.5808 14
 -9 2 8 197.712 30.3219 3
 -9 -2 8 159.186 30.3581 3
 9 -2 -8 183.357 30.0087 14
 -9 2 7 483.507 41.5708 3
 -9 -2 7 411.089 40.3944 3
 -9 -2 7 339.353 86.4283 16
 9 -2 -7 406.264 38.1965 14
 -9 2 6 18.27 19.3015 3
 -9 -2 6 -26.8953 23.7441 3
 -9 -2 6 46.8681 49.1202 16
 -9 -2 5 486.731 97.8969 16
 -9 2 5 542.602 42.8941 3
 -9 -2 5 519.993 43.9739 3
 -9 2 4 76.3793 22.0107 3
 -9 -2 4 34.5227 21.2213 3
 -9 -2 4 66.233 49.4631 16
 -9 -2 3 716.814 111.431 16
 -9 2 3 697.316 48.4353 3
 -9 -2 3 687.302 48.7316 3
 -9 2 2 118.404 25.6877 3
 -9 -2 2 95.4804 21.0165 3
 -9 -2 2 103.761 24.2465 12
 -9 -2 2 97.6085 52.5348 16
 -9 2 1 69.1579 17.0364 13
 -9 2 1 155.711 28.2503 3
 -9 -2 1 135.522 27.4671 3
 -9 -2 1 103.53 24.5995 12
 -9 -2 1 159.522 62.9067 16
 -9 -2 0 446.749 38.9731 12
 -9 2 0 436.072 77.7361 16
 -9 -2 0 343.653 83.0044 16
 -9 2 0 370.269 35.9404 3
 -9 -2 0 372.701 37.4335 3
 -9 2 0 291.239 28.5043 13
 -9 -2 -1 3.60557 20.7412 12
 -9 2 -1 -5.3854 14.8201 13
 -9 -2 -2 26.1953 18.7292 12
 -9 2 -2 54.8957 18.5221 13
 -9 -2 -2 28.7652 17.3202 13
 -9 -2 -3 121.725 25.4628 12
 -9 2 -3 118.099 21.2341 13
 -9 -2 -3 83.5519 18.0438 13
 -9 -2 -4 88.2734 21.8949 12
 -9 2 -4 61.2776 19.1215 13
 -9 -2 -4 63.2872 18.1142 13
 -9 -2 -5 24.1529 16.5924 12
 -9 2 -5 -9.10787 16.0929 13
 -9 -2 -5 7.70993 13.9828 13
 -9 -2 -6 111.338 21.6692 12
 -9 2 -6 92.6296 18.8561 13
 -9 -2 -6 71.5473 17.2701 13
 -9 -2 -7 504.294 34.1292 12
 -9 2 -7 423.345 32.0869 13
 -9 -2 -8 57.7113 17.0863 12
 -9 2 -8 44.904 16.0062 13
 -9 2 -9 75.3624 17.4462 13
 -9 2 -10 278.765 23.4552 13
 -9 2 -11 228.745 20.6186 13
 9 -3 -18 121.384 21.6511 14
 9 -3 -17 64.8023 19.2787 14
 9 -3 -16 9.28129 20.0918 14
 9 -3 -15 264.261 31.4448 14
 9 -3 -14 298.23 34.22 14
 9 -3 -13 5.30209 20.1755 14
 9 -3 -12 39.8656 24.4295 14
 9 -3 -11 7.17539 23.849 14
 9 -3 -10 14.3509 22.0938 14
 9 -3 -9 184.951 31.6617 14
 9 -3 -8 -10.2872 23.861 14
 9 -3 -7 1095.38 59.5992 14
 9 -3 -6 4039.76 109.161 14
 9 -3 -5 190.363 31.4469 14
 9 -3 -4 155.424 27.9156 14
 -9 -3 3 141.046 26.6933 12
 9 -3 -3 197.364 29.6983 14
 -9 -3 2 750.294 49.4162 12
 9 -3 -2 745.364 48.6028 14
 -9 -3 1 2249.36 80.9563 12
 9 -3 -1 2301.92 80.4314 14
 -9 -3 0 3992.43 104.565 12
 9 -3 0 3869.04 102.615 14
 -9 -3 -1 588.869 44.1103 12
 9 -3 1 585.516 43.2127 14
 -9 -3 -2 293.922 32.8015 12
 9 -3 2 278.93 32.2891 14
 -9 -3 -3 88.6519 24.1356 12
 -9 -3 -4 -22.4221 19.5636 12
 -9 -3 -5 686.848 40.6872 12
 -9 3 -5 684.762 36.9815 13
 -9 -3 -6 -10.5171 18.2402 12
 -9 3 -6 17.5509 14.0044 13
 -9 -3 -7 158.449 23.0507 12
 -9 3 -7 219.249 22.0995 13
 -9 -3 -8 51.1954 17.4453 12
 -9 3 -8 98.4739 16.0281 13
 -9 -3 -9 347.369 26.4576 12
 -9 3 -9 334.521 23.2592 13
 -9 -3 -10 17.3305 13.3513 12
 -9 3 -10 16.3499 10.8892 13
 9 -4 -17 19.7027 15.0729 14
 9 -4 -16 -7.8789 17.106 14
 9 -4 -15 184.01 25.6055 14
 9 -4 -14 4.01436 19.2701 14
 9 -4 -13 8.56335 20.566 14
 9 -4 -12 128.738 27.5202 14
 9 -4 -11 -17.204 24.6955 14
 9 -4 -10 122.83 26.9351 14
 9 -4 -9 77.2428 25.1852 14
 9 -4 -8 818.455 52.3004 14
 9 -4 -7 411.566 39.9682 14
 9 -4 -6 182.508 29.2659 14
 -9 -4 5 -95.3189 29.4709 12
 9 -4 -5 25.2789 20.8881 14
 -9 -4 4 96.4501 21.2947 12
 9 -4 -4 169.948 29.6303 14
 -9 -4 3 62.2599 24.0429 12
 9 -4 -3 139.5 28.0651 14
 -9 -4 2 379.208 36.2924 12
 9 -4 -2 428.461 39.3876 14
 -9 -4 1 317.694 34.9859 12
 9 -4 -1 357.249 37.1626 14
 -9 -4 0 22.6934 24.5027 12
 9 -4 0 34.7528 21.327 14
 -9 -4 -1 57.8121 23.6395 12
 9 -4 1 57.8397 20.7051 14
 -9 -4 -2 28.2514 25.3116 12
 9 -4 2 47.7627 22.9898 14
 -9 -4 -3 2437.02 76.1856 12
 -9 -4 -4 628.963 41.9245 12
 -9 -4 -5 41.6327 18.3073 12
 -9 -4 -6 484.076 34.5897 12
 -9 -4 -7 213.823 23.6893 12
 -9 -4 -8 10.796 13.5002 12
 -9 -4 -9 294.834 22.982 12
 9 -5 -15 4.58368 14.4268 14
 9 -5 -14 -36.2724 18.2116 14
 9 -5 -13 292.165 28.5101 14
 9 -5 -12 141.701 24.0813 14
 9 -5 -11 25.7605 20.6152 14
 9 -5 -10 901.732 49.0779 14
 9 -5 -9 452.706 38.6409 14
 -9 -5 8 131.366 23.7472 12
 9 -5 -8 115.216 25.5029 14
 -9 -5 7 68.6044 20.8129 12
 9 -5 -7 90.2225 25.4343 14
 -9 -5 6 -40.2147 21.2045 12
 9 -5 -6 41.6983 23.0586 14
 -9 -5 5 90.3207 22.0609 12
 9 -5 -5 131.778 25.5557 14
 -9 -5 4 145.143 23.8959 12
 9 -5 -4 214.933 31.1967 14
 -9 -5 3 83.7402 20.849 12
 9 -5 -3 94.0452 25.5187 14
 -9 -5 2 58.7489 20.6072 12
 9 -5 -2 49.1663 22.8071 14
 9 -5 -2 20.341 17.1023 7
 -9 -5 1 12.2991 19.2165 12
 9 -5 -1 -1.22223 22.8237 14
 9 -5 -1 14.2418 16.1421 7
 -9 -5 0 3698.45 90.8049 12
 9 -5 0 3684 95.9778 14
 9 -5 0 3584.7 86.3095 7
 -9 -5 -1 537.926 38.3248 12
 9 -5 1 497.71 41.2709 14
 -9 -5 -2 386.359 32.9868 12
 -9 -5 -3 -6.34123 16.7664 12
 -9 -5 -4 3.66095 15.8237 12
 -9 -5 -5 328.577 26.6317 12
 -9 -5 -6 34.4838 14.7083 12
 -9 -5 -7 176.639 19.3151 12
 9 -6 -12 366.951 26.3048 14
 9 -6 -11 58.2925 17.3996 14
 9 -6 -10 284.742 26.764 14
 9 -6 -9 118.681 21.6322 14
 9 -6 -8 87.7696 20.0057 14
 9 -6 -7 26.0862 17.3428 14
 9 -6 -6 110.708 23.0945 14
 9 -6 -6 114.704 22.2398 7
 9 -6 -5 58.4245 20.3434 14
 9 -6 -5 24.648 16.7043 7
 -9 -6 4 55.1635 17.1089 12
 9 -6 -4 36.9185 17.9922 14
 9 -6 -4 78.0799 20.2051 7
 -9 -6 3 185.937 22.4399 12
 9 -6 -3 184.483 25.2718 14
 9 -6 -3 170.21 23.0207 7
 -9 -6 2 138.792 19.8459 12
 9 -6 -2 112.575 22.6965 14
 9 -6 -2 163.248 23.3184 7
 -9 -6 1 12.3049 13.8856 12
 9 -6 -1 4.03143 17.5131 14
 9 -6 -1 3.04098 15.1238 7
 -9 -6 0 463.361 30.121 12
 9 -6 0 505.166 32.8798 7
 -9 -6 -1 102.403 18.5469 12
 9 -6 1 100.237 17.7815 7
 -9 -6 -2 9.47886 13.4018 12
 9 -6 2 16.3987 12.9223 7
 -9 -6 -3 14.1517 12.6919 12
 -9 -6 -4 32.3839 12.6924 12
 9 -7 -7 20.3057 13.2231 7
 9 -7 -6 132.389 18.0362 14
 9 -7 -6 141.633 18.595 7
 9 -7 -5 28.2703 13.3049 14
 9 -7 -5 30.6265 13.7961 7
 9 -7 -4 94.7653 17.2955 14
 9 -7 -4 114.693 17.4033 7
 9 -7 -3 23.4974 13.0104 14
 9 -7 -3 40.3307 15.25 7
 9 -7 -2 29.2823 13.4489 7
 9 -7 -1 185.679 19.3881 7
 -10 0 18 259.172 27.2011 3
 -10 0 17 -7.19308 18.8962 3
 -10 0 16 293.334 32.6572 3
 -10 0 15 12.4115 22.247 3
 -10 0 14 965.027 58.4093 3
 -10 0 13 -22.9031 26.7028 3
 -10 0 12 502.811 45.9488 3
 -10 0 11 2.90717 25.0679 3
 -10 0 10 572.506 49.9611 3
 -10 0 9 -66.4239 29.1949 3
 -10 0 8 -54.8211 29.2594 3
 -10 0 7 -47.0847 30.7689 3
 -10 0 6 288.652 36.1572 3
 -10 0 5 15.8932 26.6655 3
 -10 0 4 1896.9 80.9831 3
 -10 0 3 7.68603 22.8682 3
 -10 0 2 381.829 41.2052 3
 -10 0 1 -27.8253 25.274 3
 -10 0 0 34.7122 17.3458 13
 -10 0 -1 -3.63908 17.2392 13
 -10 0 -2 58.8639 20.4836 13
 -10 0 -3 4.02332 16.1899 13
 -10 0 -4 281.961 29.8675 13
 -10 0 -5 4.76629 15.9557 13
 -10 0 -6 365.098 28.9005 13
 -10 0 -7 45.8866 15.9573 13
 -10 0 -8 246.108 22.0068 13
 -10 0 -9 9.08596 10.5298 13
 -10 1 17 70.2352 19.4904 3
 -10 -1 17 93.6687 21.6178 3
 -10 1 16 78.9572 21.402 3
 -10 -1 16 121.23 26.5209 3
 -10 1 15 205.493 29.4999 3
 -10 -1 15 190.074 31.3377 3
 -10 1 14 243.973 33.4487 3
 -10 -1 14 163.21 31.327 3
 -10 1 13 20.4595 22.07 3
 -10 -1 13 8.14524 24.9938 3
 -10 1 12 338.83 37.3039 3
 -10 -1 12 391.125 42.3993 3
 -10 1 11 40.7521 23.1109 3
 -10 -1 11 -20.1009 25.0502 3
 -10 1 10 383.919 39.7872 3
 -10 -1 10 297.271 37.6822 3
 -10 1 9 -12.5929 23.9285 3
 -10 -1 9 -82.5385 30.8046 3
 -10 1 8 303.286 36.8843 3
 -10 -1 8 213.135 30.9369 3
 -10 1 7 76.0086 23.8488 3
 -10 -1 7 44.2926 22.3834 3
 -10 1 6 375.15 39.2214 3
 -10 -1 6 383.323 38.9902 3
 -10 1 5 42.5428 24.4759 3
 -10 -1 5 34.2071 23.9531 3
 -10 -1 4 1014.49 53.2331 12
 -10 1 4 1127.08 62.0397 3
 -10 -1 4 1104.32 62.1466 3
 -10 1 3 -6.25504 22.3981 3
 -10 -1 3 4.71782 20.9243 3
 -10 -1 3 23.1959 21.5608 12
 -10 1 2 637.367 47.7386 3
 -10 -1 2 615.115 47.0061 3
 -10 1 1 -41.1542 24.7677 3
 -10 -1 1 -15.1201 24.0536 3
 -10 1 1 16.6932 16.5458 13
 -10 1 0 37.212 16.1086 13
 -10 -1 0 55.0311 17.3781 13
 -10 1 -1 82.118 20.6479 13
 -10 -1 -1 74.9942 21.0544 13
 -10 1 -2 37.5998 16.8871 13
 -10 -1 -2 29.3511 17.6438 13
 -10 1 -3 66.4832 19.38 13
 -10 -1 -3 55.0748 18.2819 13
 -10 1 -4 42.7162 17.0934 13
 -10 -1 -4 46.8476 17.504 13
 -10 1 -5 17.7352 16.4603 13
 -10 -1 -5 23.4197 15.0185 13
 -10 1 -6 13.6145 15.8896 13
 -10 -1 -6 14.0201 14.7398 13
 -10 1 -7 7.49145 13.6279 13
 -10 -1 -7 38.0529 13.9894 13
 -10 1 -8 12.9043 13.4708 13
 -10 -1 -8 -9.78838 11.7478 13
 -10 1 -9 -2.84026 10.7331 13
 -10 2 16 22.6193 15.2482 3
 -10 -2 16 -0.94682 16.4708 3
 10 -2 -16 -13.6026 16.3988 14
 -10 2 15 76.8374 20.1673 3
 -10 -2 15 78.2752 21.156 3
 10 -2 -15 30.9845 17.7479 14
 10 -2 -14 900.122 46.2388 14
 -10 2 14 1053.9 51.6554 3
 -10 -2 14 921.714 51.7009 3
 10 -2 -13 632.967 41.1257 14
 -10 -2 13 555.9 42.4555 3
 -10 2 12 -1.86483 20.8253 3
 -10 -2 12 -3.57703 22.4123 3
 10 -2 -12 -27.5438 19.5003 14
 -10 2 11 222.38 29.7976 3
 -10 -2 11 223.787 31.7753 3
 10 -2 -11 194.244 26.4282 14
 -10 2 10 681.048 46.3628 3
 -10 -2 10 667.554 48.6463 3
 -10 2 9 54.0204 21.3618 3
 -10 -2 9 1.58719 19.8014 3
 -10 2 8 -23.1162 22.1052 3
 -10 -2 8 -33.3224 25.3794 3
 -10 2 7 146.985 25.3021 3
 -10 -2 7 124.335 28.8898 3
 -10 2 6 3113.58 94.1502 3
 -10 -2 6 3203.28 98.7776 3
 -10 2 5 66.8503 23.9175 3
 -10 -2 5 17.2992 19.8942 3
 -10 2 4 311.163 34.588 3
 -10 -2 4 342.439 35.5782 3
 -10 -2 4 259.615 31.7326 12
 -10 -2 3 181.704 27.3176 3
 -10 -2 3 162.165 25.8988 12
 -10 2 3 190.858 27.4246 3
 -10 2 3 166.382 22.1304 13
 -10 -2 2 3.64989 18.6535 12
 -10 2 2 -13.7544 21.4203 3
 -10 -2 2 0.87727 20.79 3
 -10 2 2 11.7648 14.8924 13
 -10 -2 1 -17.4333 18.6667 12
 -10 2 1 15.0338 14.9296 13
 -10 -2 0 77.5897 19.4015 12
 -10 2 0 91.7091 18.4304 13
 -10 -2 0 74.1629 19.0117 13
 -10 -2 -1 19.9089 16.5563 12
 -10 2 -1 27.7827 14.584 13
 -10 -2 -1 21.5286 14.7876 13
 -10 -2 -2 185.059 23.5912 12
 -10 2 -2 194.679 23.3073 13
 -10 -2 -2 168.594 22.325 13
 -10 -2 -3 298.835 27.6565 12
 -10 2 -3 305.368 26.6524 13
 -10 -2 -3 254.185 25.6065 13
 -10 -2 -4 56.2086 17.1401 12
 -10 2 -4 48.7684 16.6094 13
 -10 -2 -4 55.5191 16.0865 13
 -10 2 -5 -17.0811 14.8709 13
 -10 -2 -5 9.75566 13.6932 13
 -10 2 -6 213.034 21.6189 13
 -10 -2 -6 196.951 19.9206 13
 -10 2 -7 75.9951 15.3887 13
 -10 2 -8 -27.9906 12.5337 13
 10 -3 -16 130.574 20.0342 14
 10 -3 -15 39.987 16.5297 14
 10 -3 -14 49.7702 18.0796 14
 10 -3 -13 476.543 35.4111 14
 10 -3 -12 62.9259 21.8621 14
 10 -3 -11 56.8035 21.3711 14
 10 -3 -10 120.033 23.913 14
 10 -3 -9 389.389 35.5809 14
 10 -3 -8 48.5072 21.7828 14
 10 -3 -7 1482.18 62.3318 14
 -10 -3 6 200.095 31.2366 12
 10 -3 -6 247.488 31.3118 14
 -10 -3 5 -11.5012 21.829 12
 10 -3 -5 -12.7975 19.078 14
 -10 -3 4 -8.38989 22.4724 12
 10 -3 -4 -22.0307 19.7143 14
 -10 -3 3 58.5389 21.6906 12
 10 -3 -3 76.2759 21.8284 14
 -10 -3 2 75.8521 22.4318 12
 -10 -3 1 39.4808 20.5714 12
 -10 -3 0 46.4224 21.3741 12
 -10 -3 -1 738.746 43.0086 12
 -10 -3 -2 609.931 38.7825 12
 -10 -3 -3 893.792 43.5964 12
 -10 -3 -4 1521.93 52.8092 12
 -10 -3 -5 11.6791 14.2568 12
 -10 -3 -6 -11.0227 12.5275 12
 10 -4 -14 15.0275 15.6236 14
 10 -4 -13 -17.1202 17.44 14
 10 -4 -12 -31.9315 18.862 14
 10 -4 -11 10.6577 17.9097 14
 10 -4 -10 56.3932 21.5894 14
 10 -4 -9 395.262 34.8058 14
 -10 -4 8 363.749 33.8049 12
 10 -4 -8 374.116 33.7072 14
 -10 -4 7 -12.379 20.7793 12
 10 -4 -7 -0.69609 17.9004 14
 -10 -4 6 -34.056 23.7571 12
 10 -4 -6 52.8989 21.654 14
 -10 -4 5 650.561 42.6543 12
 10 -4 -5 658.571 42.9336 14
 -10 -4 4 460.458 37.3637 12
 10 -4 -4 438.941 35.6851 14
 -10 -4 3 180.619 26.4231 12
 10 -4 -3 198.964 26.0144 14
 -10 -4 2 231.829 27.7246 12
 10 -4 -2 221.425 27.5084 14
 -10 -4 1 234.562 28.2166 12
 10 -4 -1 196.425 25.8297 14
 -10 -4 0 129.254 24.0956 12
 10 -4 0 73.6153 19.4996 14
 -10 -4 -1 357.323 30.7164 12
 -10 -4 -2 44.6061 17.9535 12
 -10 -4 -3 17.9355 15.2883 12
 -10 -4 -4 51.3185 16.1858 12
 -10 -4 -5 160.728 19.4652 12
 10 -5 -12 6.00302 14.3055 14
 -10 -5 11 82.1491 16.1365 12
 10 -5 -11 98.5463 19.457 14
 -10 -5 10 2.33206 12.9471 12
 10 -5 -10 0.89502 15.1618 14
 -10 -5 9 59.61 16.257 12
 10 -5 -9 80.7497 20.0124 14
 -10 -5 8 29.0699 15.3073 12
 10 -5 -8 26.2038 18.0471 14
 -10 -5 7 595.465 35.0462 12
 10 -5 -7 697.075 40.2249 14
 -10 -5 6 50.3613 17.7295 12
 10 -5 -6 42.7592 18.3431 14
 -10 -5 5 -27.4139 15.928 12
 10 -5 -5 -24.8674 18.2431 14
 10 -5 -5 13.0483 13.9771 7
 -10 -5 4 196.944 24.2679 12
 10 -5 -4 183.357 24.5568 14
 10 -5 -4 205.72 22.6174 7
 -10 -5 3 -12.0047 14.6963 12
 10 -5 -3 -2.83847 16.0656 14
 10 -5 -3 -21.9611 15.174 7
 -10 -5 2 211.792 23.784 12
 10 -5 -2 187.778 24.6841 14
 -10 -5 1 726.822 38.231 12
 10 -5 -1 576.16 35.2483 14
 -10 -5 0 21.045 15.9179 12
 -10 -5 -1 953.148 39.8017 12
 -10 -5 -2 480.969 28.8092 12
 -10 -5 -3 15.2749 12.4863 12
 10 -6 -6 23.0146 13.9961 14
 10 -6 -5 131.508 18.6985 14
 10 -6 -4 47.499 15.4458 14
 10 -6 -3 254.8 22.4445 14
 -11 0 15 688.03 38.9485 3
 -11 0 14 19.9843 18.6161 3
 -11 0 13 196.788 27.5698 3
 -11 0 12 21.6713 20.5 3
 -11 0 11 407.221 35.8984 3
 -11 0 10 1.0403 22.3705 3
 -11 0 9 133.492 27.4908 3
 -11 0 8 -45.0693 24.3241 3
 -11 0 7 -14.6884 23.3317 3
 -11 0 6 6.95664 21.8405 3
 -11 0 5 696.549 46.7919 3
 -11 0 4 24.5456 23.5547 3
 -11 0 3 -17.7088 17.6689 13
 -11 0 2 5.75166 16.0184 13
 -11 0 1 78.8623 19.7769 13
 -11 0 0 1.52394 15.5846 13
 -11 0 -1 133.586 20.6565 13
 -11 0 -2 51.535 16.9526 13
 -11 0 -3 147.241 19.5261 13
 -11 0 -4 -8.81016 12.3967 13
 -11 0 -5 323.787 21.6636 13
 -11 1 14 -16.4408 17.3879 3
 -11 -1 14 12.6245 18.0081 3
 -11 1 13 70.1074 19.0443 3
 -11 -1 13 51.4673 19.2288 3
 -11 1 12 10.8496 18.3239 3
 -11 -1 12 -11.795 20.1704 3
 -11 1 11 143.976 24.605 3
 -11 -1 11 120.448 24.5367 3
 -11 1 10 23.3253 18.4706 3
 -11 -1 10 46.7247 20.8332 3
 -11 1 9 31.5131 19.5926 3
 -11 -1 9 29.1722 20.2441 3
 -11 1 8 61.4463 22.3121 3
 -11 -1 8 56.4574 22.296 3
 -11 -1 8 69.2838 18.6298 12
 -11 1 7 -4.58889 20.389 3
 -11 -1 7 10.2337 19.6195 3
 -11 -1 7 -28.0038 16.8365 12
 -11 1 6 574.522 43.0457 3
 -11 -1 6 558.923 44.4552 3
 -11 1 5 528.194 40.7898 3
 -11 -1 5 424.874 38.0017 3
 -11 1 4 15.554 18.9876 3
 -11 -1 4 31.8742 22.2771 3
 -11 1 4 15.5465 14.851 13
 -11 -1 3 367.825 30.2974 13
 -11 1 3 329.305 27.1983 13
 -11 1 2 276.171 26.277 13
 -11 -1 2 254.181 25.6309 13
 -11 1 1 206.841 23.2676 13
 -11 -1 1 193.973 23.1011 13
 -11 1 0 113.797 19.7524 13
 -11 -1 0 128.262 20.4201 13
 -11 1 -1 128.189 18.9694 13
 -11 -1 -1 134.283 19.4225 13
 -11 1 -2 60.5103 16.1359 13
 -11 -1 -2 49.9016 15.8835 13
 -11 1 -3 -2.53668 13.1273 13
 -11 -1 -3 18.8178 14.1835 13
 -11 1 -4 44.972 13.9662 13
 -11 -1 -4 72.5398 13.6095 13
 -11 2 13 271.006 25.3694 3
 -11 -2 13 232.768 24.7207 3
 -11 2 12 23.9257 15.9649 3
 -11 -2 12 -37.5487 18.3606 3
 -11 2 11 31.2545 15.2581 3
 -11 -2 11 45.8955 17.1457 3
 -11 2 10 7.17699 16.0858 3
 -11 -2 10 -5.58225 16.2811 3
 -11 2 9 32.634 16.1096 3
 -11 -2 9 30.5907 19.4425 3
 -11 2 8 194.862 26.1559 3
 -11 -2 8 162.404 25.2106 3
 -11 -2 8 129.689 24.3932 12
 -11 2 7 73.2706 20.6517 3
 -11 -2 7 51.0561 19.8629 3
 -11 -2 7 42.3356 18.9179 12
 -11 -2 6 533.327 37.0439 12
 -11 2 6 548.329 36.9739 3
 -11 -2 6 547.946 38.9684 3
 -11 -2 5 16.6765 17.9397 12
 -11 2 5 26.2207 16.4786 3
 -11 -2 5 -4.6814 16.723 3
 -11 -2 4 -8.1275 15.82 12
 -11 -2 3 27.0561 15.2317 12
 -11 2 3 31.626 13.1608 13
 -11 -2 3 3.84 14.5557 13
 -11 -2 2 4.96862 13.9576 12
 -11 2 2 6.32211 12.0726 13
 -11 -2 2 -6.52468 13.7628 13
 -11 -2 1 16.7877 13.9225 12
 -11 2 1 0.24047 12.0014 13
 -11 -2 1 6.41998 13.2375 13
 -11 -2 0 92.562 17.3387 12
 -11 2 0 66.6628 14.4869 13
 -11 -2 0 74.8591 15.5226 13
 -11 2 -1 269.217 22.0907 13
 -11 -2 -1 236.107 21.2316 13
 -11 2 -2 253.586 20.6064 13
 -11 -2 -2 240.369 20.1662 13
 -11 2 -3 -2.22247 10.6908 13
 -11 -2 -3 -1.29408 9.98377 13
 -11 -3 11 -1.17176 16.9154 12
 11 -3 -11 7.56409 13.6653 14
 -11 -3 10 41.6268 16.4032 12
 11 -3 -10 46.0292 16.3587 14
 -11 -3 9 123.817 21.7688 12
 -11 -3 8 9.38817 17.3995 12
 -11 -3 7 5.4009 17.0136 12
 -11 -3 6 20.8906 16.8762 12
 -11 -3 5 35.4908 17.8083 12
 -11 -3 4 25.6823 15.8426 12
 -11 -3 4 39.632 13.3576 13
 -11 -3 3 11.739 16.0161 12
 -11 -3 3 -8.24472 12.207 13
 -11 -3 2 31.2409 15.9762 12
 -11 -3 1 107.776 19.2395 12
 -11 -3 0 14.402 13.9023 12
 -11 -3 -1 29.3362 13.92 12
 -11 -4 9 107.905 17.446 12
 -11 -4 8 78.2432 17.512 12
 11 -4 -8 39.0839 15.2969 14
 -11 -4 7 80.6191 17.8644 12
 11 -4 -7 105.559 18.2404 14
 -11 -4 6 354.589 27.8901 12
 11 -4 -6 314.839 25.4914 14
 -11 -4 5 -11.833 15.0254 12
 11 -4 -5 -17.3917 14.3161 14
 -11 -4 4 -1.21956 14.7681 12
 11 -4 -4 12.4652 12.9904 14
 -11 -4 3 11.5271 14.8184 12
 -11 -4 2 25.8049 13.5675 12
 -11 -4 1 -11.0206 13.1691 12
 -12 0 8 6.34607 14.903 3
 -12 0 7 -13.7403 12.7921 13
 -12 0 6 111.546 16.2514 13
 -12 0 5 -10.1923 12.7311 13
 -12 0 4 96.1842 14.7761 13
 -12 0 3 9.21056 11.8882 13
 -12 -1 7 2.81064 12.1962 13
 -12 -1 6 34.8113 13.2314 13
 -12 -1 5 91.5129 15.119 13
 -12 -1 4 52.2115 13.2055 13
